# Supplementary material
Source: PubMed Central journal article supplement (PMC4056992)
Supplement: ml400175d_si_001.pdf [file ml400175d_si_001.pdf]

## SUPPORTING INFORMATION

### Development of a chimeric c-Src kinase and HDAC inhibitor

Kristin S. Ko, Michael E. Steffey, Kristoffer R. Brandvold, and Matthew B. Soellner\*

#### TABLE OF CONTENTS

|       |                                                 |     |
|-------|-------------------------------------------------|-----|
| I.    | General synthetic methods                       | S2  |
| II.   | Synthesis of compounds 3-10                     | S2  |
| III.  | Spectral data for compounds 3-10                | S8  |
| IV.   | Biochemical characterization for compounds 3-10 | S22 |
| V.    | Analytical HPLC for compounds 3-10              | S29 |
| VI.   | Stability of compound 4 in cell lysate          | S37 |
| VII.  | ATP $K_m$ curves                                | S38 |
| VIII. | $K_m$ curve for HDAC1 peptide substrate         | S39 |
| IX.   | HDAC profiling                                  | S40 |
| X.    | Cellular characterization                       | S43 |
| XI.   | NCI-60 cellular profile data                    | S48 |
| XII.  | CellMiner profile data                          | S56 |
| XIII. | References                                      | S57 |

## I. GENERAL SYNTHETIC METHODS.

Unless otherwise noted, all reagents were obtained from commercial suppliers and used without further purification. All  $^1\text{H}$  and  $^{13}\text{C}$  NMR spectra were measured with a Varian MR400 and Inova 500 spectrometer. Mass spectrometry (HRMS) was carried out at the University of Michigan Ann Arbor Mass Spectrometry Facility (J. Windak, Director). Azido alkyl esters of 5–7 methylene length were synthesized adapting literature procedure.<sup>1</sup> 3-(4-chlorophenyl)-1-(4-ethynylphenyl)-1H-pyrazolo [3,4-d]pyrimidin-4-amine (PP2~alkyne) was prepared as described previously.<sup>2</sup> (E)-ethyl 3-(4-(azidomethyl)phenyl)acrylate was synthesized by adapting literature protocol.<sup>2,3</sup> Flash column chromatography was performed using a Biotage Isolera 1 Flash Purification System using KP-Sil SNAP cartridges. In all cases, ethyl acetate was used to transfer the crude reaction material onto the silica gel samplet. A gradient elution using hexane and ethyl acetate was performed, based on the recommendation from the Biotage TLC Wizard.

## II. SYNTHESIS OF COMPOUNDS 3-10

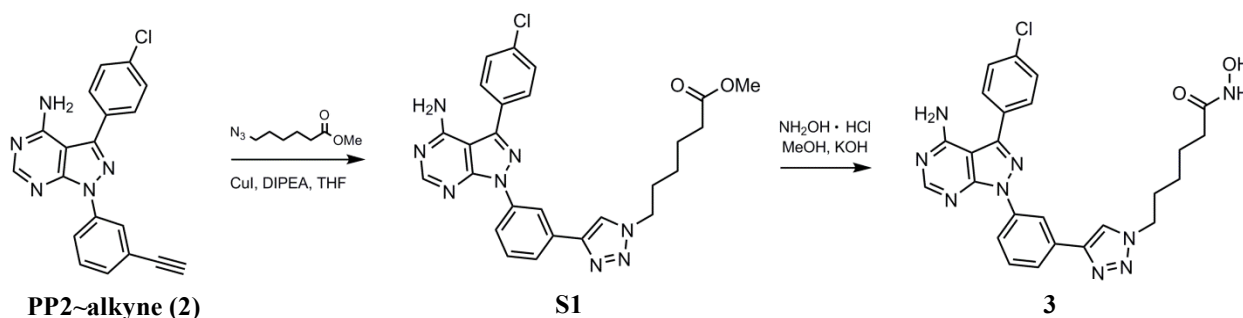

Scheme S1. Synthesis of Compound 3

**Synthesis of S1:** PP2~alkyne (0.14 mmol) and methyl 6-azidohexanoate (0.318 mmol) were dissolved in THF (1 mL) and stirred under nitrogen at room temperature. Copper (I) iodide (0.011 mmol) and Hunig's base (0.038 mL) were added to the reaction mixture which was stirred under nitrogen overnight. The reaction mixture was diluted with dichloromethane (8 mL) and washed with 1:4  $\text{NH}_4\text{OH}$ /saturated  $\text{NH}_4\text{Cl}$  (3x 12 mL) and saturated  $\text{NH}_4\text{Cl}$  (12 mL). The organic layer was dried over  $\text{MgSO}_4$ , filtered, and concentrated *in vacuo*. The crude product was purified by Biotage Isolera 1 Flash Purification System to give 20 mg (27% yield) of **S1** as a white solid. **Spectral Data.**  $^1\text{H}$  NMR (500 MHz,  $\text{CDCl}_3$ ):  $\delta$  8.65 (s, 1 H), 8.52 (s, 1 H), 8.26-8.24 (m, 1H), 7.89 (s, 2 H), 7.77 (d,  $J = 10.0$  Hz, 2 H), 7.62-7.56 (m, 3 H), 5.59 (s, 2H), 4.44 (t,  $J = 8.0$  Hz, 2 H), 3.67 (s, 3 H), 2.34 (t,  $J = 8$  Hz, 2 H), 2.02-1.97 (m, 2 H), 1.72-1.68 (m, 2 H), 1.43-1.39 (m, 2H);  $^{13}\text{C}$  NMR (100 MHz,  $\text{CDCl}_3$ ):  $\delta$  173.77, 157.97, 156.53, 154.68, 147.14, 144.41, 139.23, 135.59, 131.73, 131.15, 129.90, 129.62, 123.79, 121.12, 120.0, 118.76, 99.69, 51.56, 50.12, 33.62, 29.99, 25.91, 24.17; HRMS-ESI ( $m/z$ ):  $[\text{M} + \text{H}]^+$  calcd for  $\text{C}_{26}\text{H}_{25}\text{ClN}_8\text{O}_2$ , 517.1862; found, 517.1863.

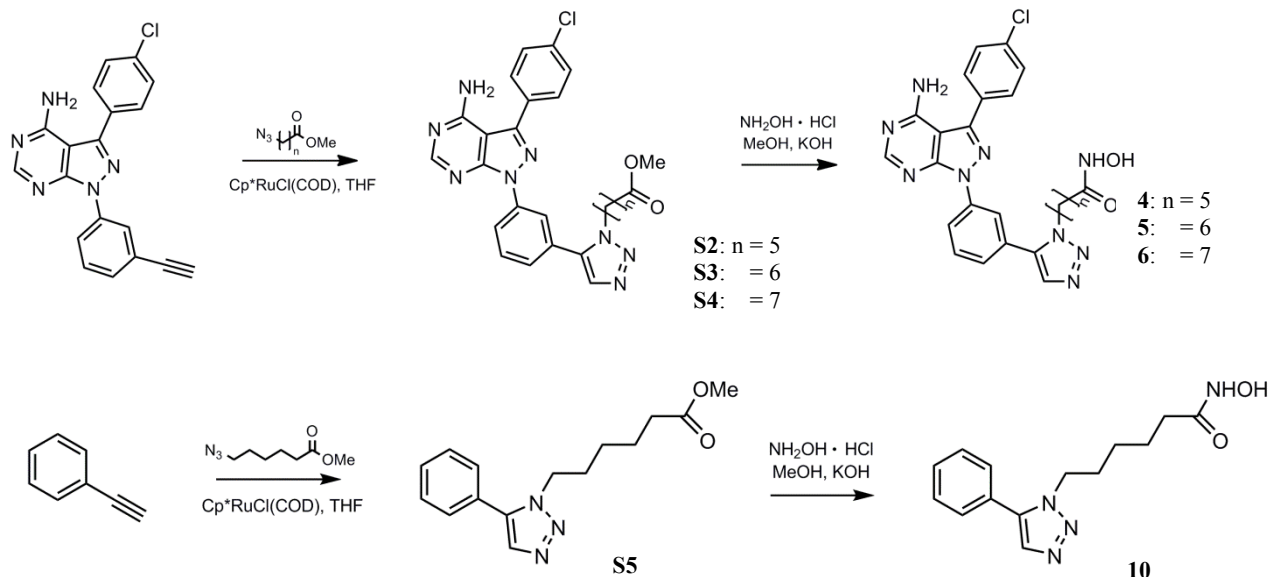

## Scheme S2. Synthesis of Compound 4-6, and 10

### Procedure of Cp\*RuCl(COD) catalyzed cycloaddition reaction.

**Synthesis of S2:** PP2~alkyne (50 mg, 0.14 mmol) and Cp\*RuCl(COD) (5.3 mg, 0.014 mmol) were added into a flame-dried round bottom flask and subsequently purged with nitrogen gas for 5 min. THF (1mL) and methyl 6-azidohexanoate (50 mL, 0.43 mmol) were then added. The reaction was allowed to stir under nitrogen at room temperature overnight. The reaction mixture was diluted with ethyl acetate (10mL) and washed with water and brine, dried over MgSO<sub>4</sub>, filtered, and concentrated in vacuo. The crude product was purified by Biotage Isolera 1 Flash Purification System to give a 28 mg (37% yield) of compound **S2** as a yellow solid. **Spectral Data.** <sup>1</sup>H NMR (400 MHz, CDCl<sub>3</sub>): δ 8.47 (s, 1 H), 8.42 (s, 2 H), 7.77 (s, 1 H), 7.72 (s,  $J = 7.2$  Hz, 2 H), 7.63 (t,  $J = 8.0$  Hz, 1 H), 7.56 (d,  $J = 8.4$  Hz, 2 H), 7.33 (d,  $J = 8.0$  Hz, 1 H), 5.67 (s, 1H), 4.44 (t,  $J = 8$  Hz, 2 H), 3.59 (s, 3 H), 2.21 (t,  $J = 8.0$  Hz, 2 H), 1.94-1.86 (m, 2 H), 1.61-1.53 (m, 2 H), 1.35-1.27 (m, 2 H); <sup>13</sup>C NMR (100 MHz, CDCl<sub>3</sub>): δ 173.71, 157.94, 156.72, 154.98, 144.89, 139.52, 137.09, 135.92, 133.26, 130.96, 129.99, 129.61, 128.11, 126.49, 121.90, 121.19, 99.93, 51.49, 48.27, 33.64, 29.82, 25.99, 24.23; HRMS-ESI ( $m/z$ ):  $[M + H]^+$  calcd for C<sub>26</sub>H<sub>25</sub>ClN<sub>8</sub>O<sub>2</sub>, 517.1862; found, 517.1861.

**Synthesis of S3:** Reaction of PP2~alkyne (50 mg, 0.14 mmol) and methyl 7-azidohexanoate (40 mL, 0.28 mmol) was prepared as described for the synthesis of **S2**. The crude product was purified by Biotage Isolera 1 Flash Purification System to give a 36 mg (47% yield) of compound **S3** as a yellow solid. **Spectral Data.** <sup>1</sup>H NMR (500 MHz, CDCl<sub>3</sub>): 8.48 (s, 1H), 8.43 (s, 2H), 7.77 (s, 1H), 7.72 (d,  $J = 6.8$ , 2H), 7.64 (t,  $J = 8$  Hz, 1H), 7.58-7.53 (m, 2H), 7.34 (d,  $J = 8.0$  Hz, 1H), 4.44 (t,  $J = 7.2$  Hz, 2H), 3.61 (s, 3H), 2.19 (t,  $J = 7.6$  Hz, 2H), 1.92-1.85 (m, 2H), 1.56-1.48 (m, 2H), 1.28-1.23 (m, 4H); <sup>13</sup>C NMR (100 MHz, CDCl<sub>3</sub>): 173.93, 158.07, 156.63, 154.94, 144.92, 139.50, 137.07, 135.86, 133.20, 130.95, 129.83, 128.12, 126.46, 121.86, 121.17,

99.88, 51.43, 48.37, 33.76, 29.96, 28.42, 26.14, 24.57 HRMS-ESI ( $m/z$ ):  $[M + H]^+$  calcd for  $C_{27}H_{27}ClN_8O_2$ , 531.2018; found, 531.2022.

**Synthesis of S4:** Reaction of PP2~alkyne (50 mg, 0.14 mmol) and methyl 8-azidohexanoate (40 mL, 0.28 mmol) was prepared as described for the synthesis of **S2**. The crude product was purified by Biotage Isolera 1 Flash Purification System to give a 36 mg (45% yield) of compound **S4** as a yellow solid. **Spectral Data.**  $^1H$  NMR (500 MHz,  $CDCl_3$ ):  $\delta$  8.52 (s, 1 H), 8.46 (s, 2 H), 7.81 (s, 1 H), 7.77-7.73 (m, 2 H), 7.70-7.64 (m, 1 H), 7.61-7.58 (m, 2 H), 7.37 (d,  $J = 7.5$  Hz, 1 H), 5.52 (s, 2H), 4.46 (t,  $J = 10$  Hz, 2 H), 3.65 (s, 3 H), 2.24 (t,  $J = 7.5$  Hz, 2 H), 1.94-1.88 (m, 2 H), 1.57-1.51 (m, 2 H), 1.32-1.23 (m, 6 H);  $^{13}C$  NMR (100 MHz,  $CDCl_3$ ): 174.08, 158.03, 156.65, 154.94, 144.91, 139.49, 137.06, 135.87, 133.22, 130.95, 129.84, 128.17, 126.49, 121.86, 121.21, 99.89, 51.44, 48.44, 33.88, 30.08, 28.8, 28.58, 26.27, 24.69; HRMS-ESI ( $m/z$ ):  $[M + H]^+$  calcd for  $C_{28}H_{29}ClN_8O_2$ , 545.2180; found, 545.2180.

**Synthesis of S5:** Reaction of phenylacetylene (54 mL, 0.49 mmol) and methyl 6-azidohexanoate (69 mL, 0.59 mmol) was prepared as described for the synthesis of **S2**. The crude product was purified by Biotage Isolera 1 Flash Purification System to give 70 mg (52% yield) of compound **S5** as light brown oil. **Spectral Data.**  $^1H$  NMR (500 MHz,  $CDCl_3$ ):  $\delta$  7.69 (s, 1 H), 7.51-7.49 (m, 3 H), 7.39-7.38 (m, 2 H), 4.36 (t,  $J = 10$  Hz, 2 H), 3.65 (s, 3 H), 2.29-2.22 (m, 2 H), 1.85 (m, 2 H), 1.59-1.55 (m, 2 H), 1.32-1.26 (m, 2 H);  $^{13}C$  NMR (100 MHz,  $CDCl_3$ ):  $\delta$  173.68, 137.64, 132.98, 129.41, 129.07, 128.66, 127.14, 51.45, 47.96, 33.57, 29.64, 25.84, 24.12; HRMS-ESI ( $m/z$ ):  $[M + H]^+$  calcd for  $C_{15}H_{19}N_3O_2$ , 274.2550; found, 274.1553.

### Procedure for conversion of methyl esters to hydroxamic acid

**Synthesis of 3:** A solution of hydroxylamine hydrochloride (271 mg, 3.9 mmol) in 10 mL of MeOH, KOH (219 mg, 3.9 mmol) was added and stirred at 40 °C for 10 min. The reaction mixture was cooled to 0 °C and filtered. Compound **S1** (10 mg, 0.02 mmol) was added to the filtrate followed by KOH (0.04 mmol) at room temperature for 3 hours. The reaction mixture was extracted with EtOAc. The organic layer was washed with saturated  $NH_4Cl$  solution and brine, and dried over  $MgSO_4$ , filtered and concentrated. The residue was purified by reverse-phase preparative HPLC (linear gradient of **5**  $\rightarrow$  95% acetonitrile and water) to give 7.3 mg of compound **3** (73%) as a white powder. **Spectral Data.**  $^1H$  NMR (500 MHz,  $CD_3OD$ ):  $\delta$  8.64 (s, 1H), 8.47 (s, 2H), 8.16 (d,  $J = 5$  Hz, 1H), 7.92-7.86 (m, 1H), 7.86-7.79 (m, 2H), 7.67-7.63 (m, 3H), 4.49 (t,  $J = 7$  Hz, 2H), 2.12 (t,  $J = 7.5$  Hz, 2H), 2.03-1.99 (m, 2H), 1.74-1.68 (m, 2H), 1.44-1.34 (m, 2H);  $^{13}C$  NMR (100 MHz,  $DMSO-d_6$ ): 169.32, 157.08, 155.06, 146.32, 145.06, 139.62, 134.36, 132.31, 131.47, 130.75, 130.20, 129.64, 123.52, 122.22, 120.81, 117.85, 99.19, 49.89, 32.47, 29.77, 25.89, 24.93; HRMS-ESI ( $m/z$ ):  $[M + H]^+$  calcd for  $C_{25}H_{24}ClN_9O_2$ , 518.1814; found, 518.1822.

**Synthesis of 4:** Compound **S2** (8.9 mg, 0.02 mmol) was added to the hydroxylamine hydrochloride solution as described for the synthesis of **3** to give 7.2 mg of compound **4** (82%) as a white powder. **Spectral Data.**  $^1H$  NMR (500 MHz,  $CD_3OD$ ):  $\delta$  8.49 – 8.43 (m, 2H), 8.34 (d,  $J = 10$  Hz, 1 H), 7.92 (s, 1 H), 7.83-7.80 (m, 2 H), 7.77 (t,  $J = 8.0$  Hz, 1 H), 7.65-7.63 (m, 2 H), 7.59 (d,  $J = 8.0$  Hz, 1 H), 4.57 (t,  $J = 7.0$  Hz, 2 H), 2.01 (t,  $J = 7.0$  Hz, 2 H), 1.93-1.87 (m, 2 H), 1.60-1.54 (m, 2 H), 1.35-1.28 (m, 2 H);  $^{13}C$  NMR (100 MHz,  $DMSO-d_6$ ):  $\delta$  169.26, 157.77, 155.76, 154.74, 145.69, 139.26, 137.05, 134.58, 133.46, 131.07, 130.74, 129.69, 128.16, 127.04,

122.16, 121.26, 99.27, 48.35, 32.44, 29.62, 25.96, 24.94; HRMS-ESI ( $m/z$ ):  $[M + H]^+$  calcd for  $C_{25}H_{24}ClN_9O_2$ , 518.1814; found, 518.1811.

**Synthesis of 5:** Compound **S3** (36 mg, 0.07 mmol) was added to the hydroxylamine hydrochloride solution as described for the synthesis of **3** to give 19 mg of compound **5** (53%) as a white powder. **Spectral Data.**  $^1H$  NMR (500 MHz, DMSO- $d_6$ ):  $\delta$  8.42 (s, 2 H), 8.34 (d,  $J = 7.4$  Hz, 1 H), 7.98 (d,  $J = 0.9$  Hz, 1 H), 7.81 – 7.77 (m, 2 H), 7.74 (t,  $J = 8.0$  Hz, 1 H), 7.65 (d,  $J = 8.5$  Hz, 2 H), 7.56 (d,  $J = 7.8$  Hz, 1 H), 4.46 (t,  $J = 7.2$  Hz, 2 H), 1.85 (t,  $J = 7.4$  Hz, 2 H), 1.79-1.75 (m, 2 H), 1.41-1.37 (m, 2 H), 1.20-1.16 (m, 4 H);  $^{13}C$  NMR (100 MHz, DMSO- $d_6$ ):  $\delta$  169.59, 158.63, 156.05, 154.86, 145.39, 139.33, 137.06, 134.52, 133.44, 131.13, 130.71, 129.67, 128.16, 126.92, 122.05, 121.11, 99.31, 48.43, 32.51, 29.77, 28.34, 26.00, 25.29; HRMS-ESI ( $m/z$ ):  $[M + H]^+$  calcd for  $C_{26}H_{26}ClN_9O_2$ , 532.1971; found, 532.1978.

**Synthesis of 6:** Compound **S4** (35 mg, 0.06 mmol) was added to the hydroxylamine hydrochloride solution as described for the synthesis of **3** to give 5.4 mg of compound **6** (15%) as a white powder. **Spectral Data.**  $^1H$  NMR (500 MHz,  $CD_3OD$ ):  $\delta$  8.49 (s, 1 H), 8.43 (s, 1 H), 8.36 (d,  $J = 7.5$  Hz, 1 H), 7.92 (s, 1 H), 7.84-7.80 (m, 2 H), 7.78 (t,  $J = 8.0$  Hz, 1 H), 7.67-7.63 (m, 2 H), 7.60 (d,  $J = 7.7$  Hz, 1 H), 4.56 (t,  $J = 7.5$  Hz, 2 H), 1.99 (t,  $J = 7.3$  Hz, 2 H), 1.89-1.84 (m, 2H), 1.51-1.46 (m, 2H), 1.29-1.20 (m, 6H);  $^{13}C$  NMR (100 MHz, DMSO- $d_6$ ):  $\delta$  169.43, 158.21, 156.29, 154.90, 145.56, 139.36, 137.06, 134.52, 133.41, 131.16, 130.72, 129.67, 128.19, 126.92, 122.03, 121.08, 99.30, 48.34, 32.57, 29.83, 28.76, 28.43, 26.14, 25.37; HRMS-ESI ( $m/z$ ):  $[M + H]^+$  calcd for  $C_{27}H_{28}ClN_9O_2$ , 546.2127; found, 546.2129.

**Synthesis of 10:** Compound **S5** (30 mg, 0.11 mmol) was added to the hydroxylamine hydrochloride solution as described for the synthesis of **3** to give 15 mg of compound **10** (50%) as an oil. **Spectral Data.**  $^1H$  NMR (500 MHz,  $CD_3OD$ ):  $\delta$  7.79 (s, 1 H), 7.58-7.50 (m, 5 H), 4.49 (t,  $J = 7.0$  Hz, 2 H), 2.01 (t,  $J = 7.4$  Hz, 2 H), 1.84-1.78 (m, 2 H), 1.57-1.51 (m, 2 H), 1.27-1.20 (m, 2 H);  $^{13}C$  NMR (100 MHz, DMSO- $d_6$ ):  $\delta$  169.28, 137.69, 133.70, 129.75, 129.55, 128.97, 127.30, 48.13, 32.39, 29.40, 25.85, 24.85; HRMS-ESI ( $m/z$ ):  $[M + H]^+$  calcd for  $C_{14}H_{18}N_4O_2$ , 275.1503; found, 275.1508.

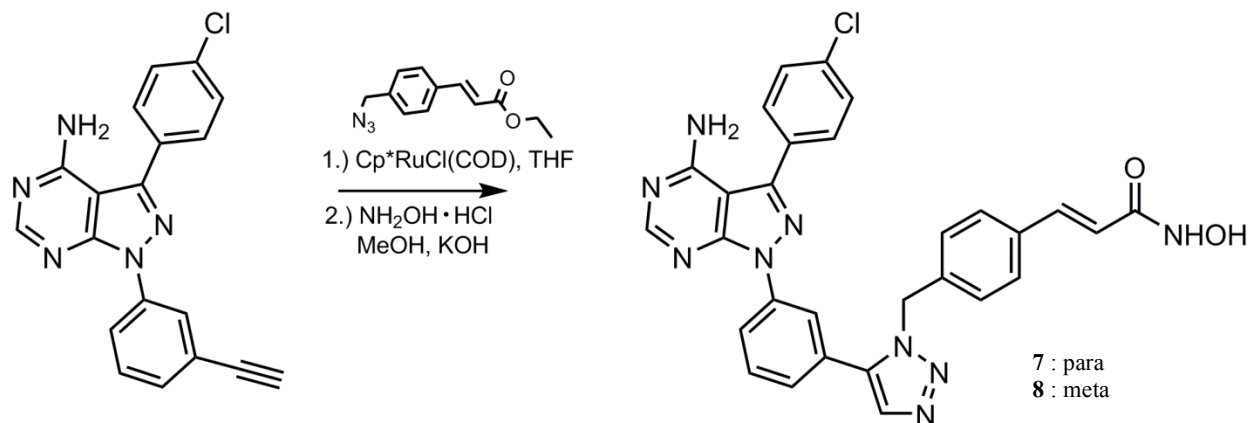

### Scheme S3. Synthesis of Compound 7 and 8

**Synthesis of 7:** Reaction of PP2~alkyne (20 mg, 0.06 mmol) and (E)-ethyl 3-(4-(azidomethyl)phenyl)acrylate (16 mg, 0.07 mmol) was prepared as described for the synthesis of **S2**. The crude product was carried on without further purification and was added to the hydroxylamine hydrochloride solution as described for the synthesis of **3** to give 1.3 mg of compound **7** (20%) as a white powder. **Spectral Data.**  $^1\text{H}$  NMR (500 MHz,  $\text{DMSO-d}_6$ ):  $\delta$  8.35 (s, 3 H), 8.10 (s, 1 H), 7.75-7.63 (m, 5 H), 7.47 (t,  $J = 8.1$  Hz, 3 H), 7.37 (d,  $J = 15.72$  Hz, 1 H), 7.09 (d,  $J = 7.5$  Hz, 2 H), 6.40 (d,  $J = 15.84$  Hz, 1 H), 5.79 (s, 2 H);  $^{13}\text{C}$  NMR (100 MHz,  $\text{DMSO-d}_6$ ): 158.79, 157.05, 155.12, 145.33, 139.43, 138.16, 137.69, 137.15, 135.64, 134.44, 133.83, 131.30, 130.71, 130.54, 129.79, 129.65, 128.39, 127.76, 126.84, 126.02, 122.08, 121, 120.02, 99.23, 51.51; HRMS-ESI ( $m/z$ ):  $[\text{M} - \text{H}]^-$  calcd for  $\text{C}_{29}\text{H}_{22}\text{ClN}_9\text{O}_2$ , 562.1512; found, 562.1502.

**Synthesis of 8:** Reaction of PP2~alkyne (10 mg, 0.03 mmol) and (E)-ethyl 3-(4-(azidomethyl)phenyl)acrylate (8 mg, 0.04 mmol) was prepared as described for the synthesis of **S2**. The crude product was carried on without further purification and was added to the hydroxylamine hydrochloride solution as described for the synthesis of **3** to give 1.4 mg of compound **8** (74%) as a white powder. **Spectral Data.**  $^1\text{H}$  NMR (500 MHz,  $\text{DMSO-d}_6$ ):  $\delta$  8.38 – 8.28 (m, 2 H), 8.09 (s, 1 H), 7.74 - 7.64 (m, 6 H), 7.49 (d,  $J = 7.75$  Hz, 1 H), 7.42 (d,  $J = 7.9$  Hz, 1 H), 7.37 – 7.24 (m, 3 H), 7.05 (d,  $J = 7.8$  Hz, 1 H), 6.35 (d,  $J = 15.8$  Hz, 1 H), 5.78 (s, 2 H);  $^{13}\text{C}$  NMR (100 MHz,  $\text{DMSO-d}_6$ ):  $\delta$  158.80, 157.06, 145.34, 139.44, 138.18, 137.69, 137.16, 134.45, 133.84, 131.31, 130.71, 130.55, 129.79, 129.66, 128.40, 127.77, 126.85, 126.04, 122.09, 120.03, 99.23, 51.51; HRMS-ESI ( $m/z$ ):  $[\text{M} - \text{H}]^-$  calcd for  $\text{C}_{29}\text{H}_{22}\text{ClN}_9\text{O}_2$ , 562.1512; found, 562.1496.

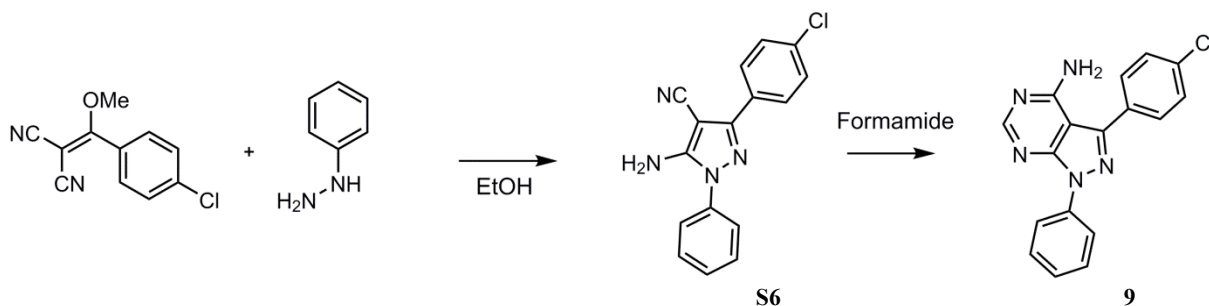

### Scheme S3. Synthesis of Compound 9

**Synthesis of S6:** To an oven-dried round bottom flask was added 2-((4-chlorophenyl)(methoxy)methylene)malononitrile<sup>2</sup> (500 mg, 2.29 mmol). Ethanol (11.4 mL) was added, followed by phenylhydrazine (247 mg, 2.29 mmol). The reaction mixture was then heated to 85 °C for 1 hour. The reaction was then allowed to cool to room temperature. During the cooling process visible precipitation began to occur. After sufficient cooling the reaction mixture was filtered to provide the product **S6** as a fluffy light pink solid (290 mg, 43% yield). **Spectral data.** <sup>1</sup>H NMR (500 MHz, DMSO-*d*<sub>6</sub>): δ 7.89-7.85 (m, 2 H), 7.60-7.53 (m, 2 H), 7.49-7.44 (m, 1 H), 6.88 (s, 2 H); <sup>13</sup>C NMR (100 MHz, DMSO-*d*<sub>6</sub>): δ 153.44, 149.50, 137.70, 134.18, 130.49, 129.95, 129.36, 128.56, 128.05, 124.79, 115.83; HRMS-APCI (*m/z*): [M + H]<sup>+</sup> calcd for C<sub>79</sub>H<sub>95</sub>ClN<sub>20</sub>O<sub>22</sub>, 295.0746; found 295.0746.

**Synthesis of 9:** To an oven-dried round bottom flask was added **S6** (205 mg, 0.7 mmol). Formamide (2 mL) was then added. The reaction mixture was heated to 220 °C for 5 hours. The reaction was then allowed to cool to room temperature. After sufficient cooling, water (6 mL) was added to precipitate the reaction. The reaction was then filtered, and the resulting solid was rinsed with water (2 mL x 3). After drying the product **9** was obtained as a light brown solid (190 mg, 85% yield). **Spectral data.** <sup>1</sup>H NMR (500 MHz, DMSO-*d*<sub>6</sub>): δ 8.38 (s, 1 H), 8.23-8.20 (m, 2 H), 7.79-7.76 (m, 2 H), 7.66-7.62 (m, 2 H), 7.59-7.54 (m, 2 H), 7.39-7.34 (m, 1 H); <sup>13</sup>C NMR (100 MHz, DMSO-*d*<sub>6</sub>): δ 158.84, 157.02, 154.91, 144.88, 139.03, 134.31, 131.53, 130.70, 129.64, 129.59, 129.83, 121.55, 99.13; HRMS-APCI (*m/z*): [M + H]<sup>+</sup> calcd for C<sub>79</sub>H<sub>95</sub>ClN<sub>20</sub>O<sub>22</sub>, 322.0854; found 322.0864.

### III. SPECTRAL DATA FOR COMPOUNDS 3-10

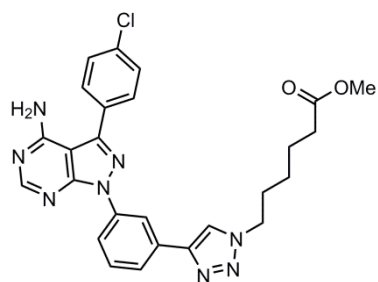

**S1**

Compound **S1** <sup>1</sup>H:

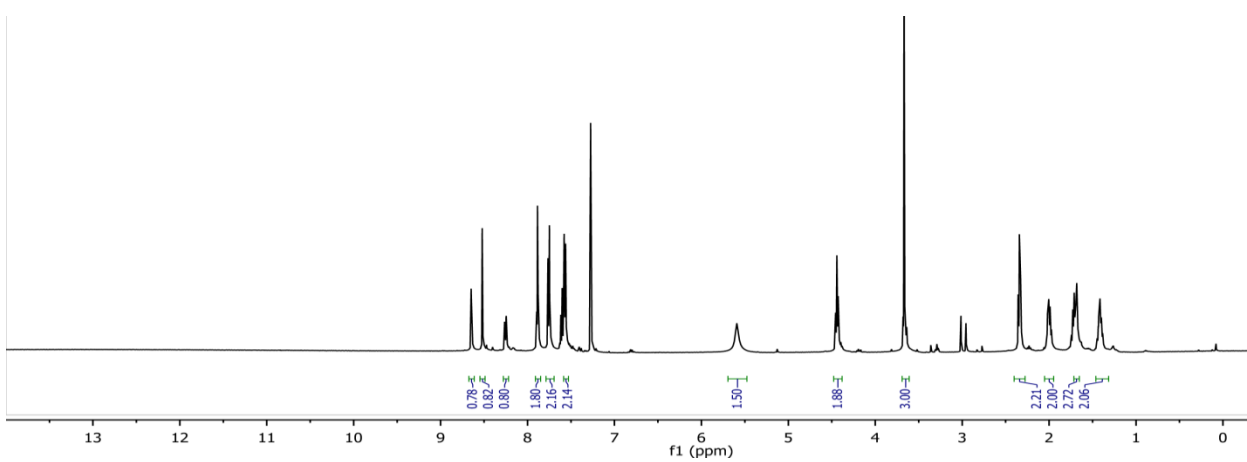

Compound **S1** <sup>13</sup>C:

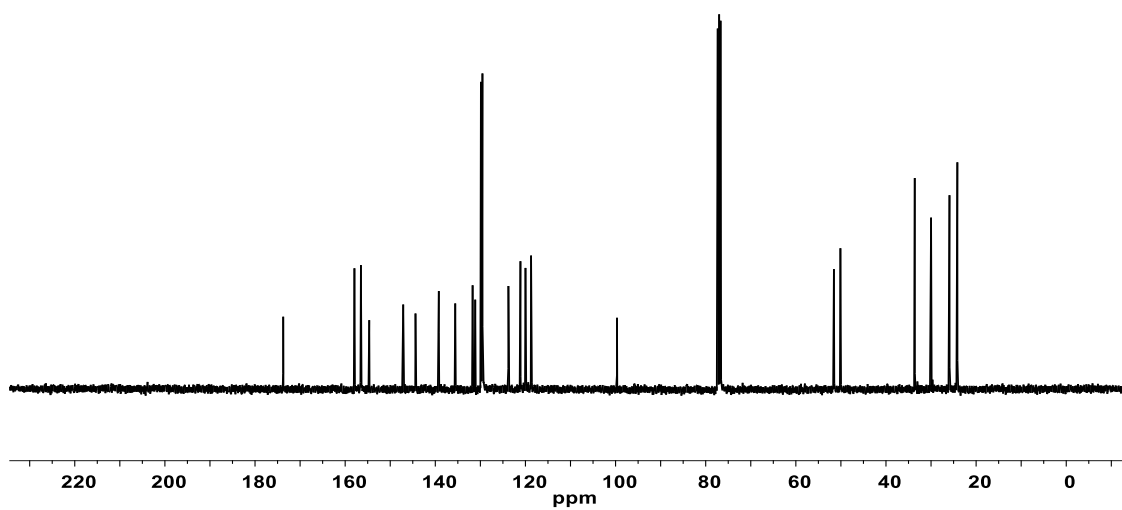



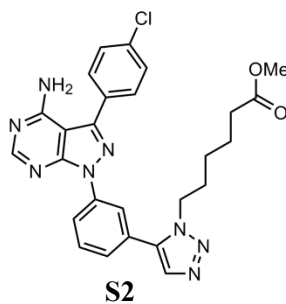

Compound **S2**  $^1\text{H}$ :

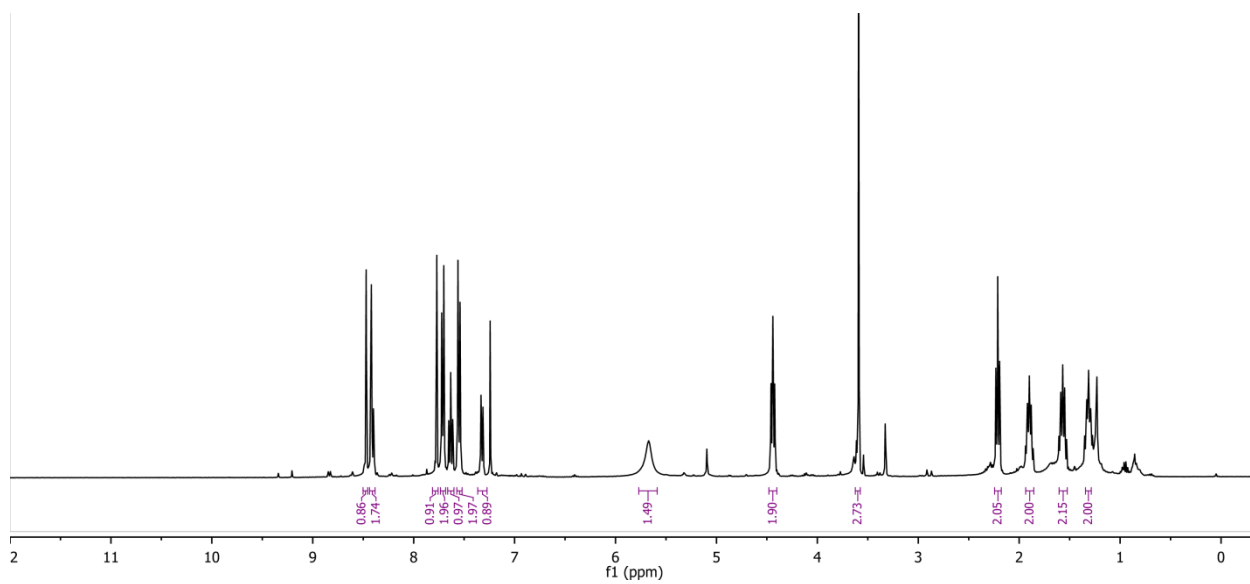

Compound **S2**  $^{13}\text{C}$ :

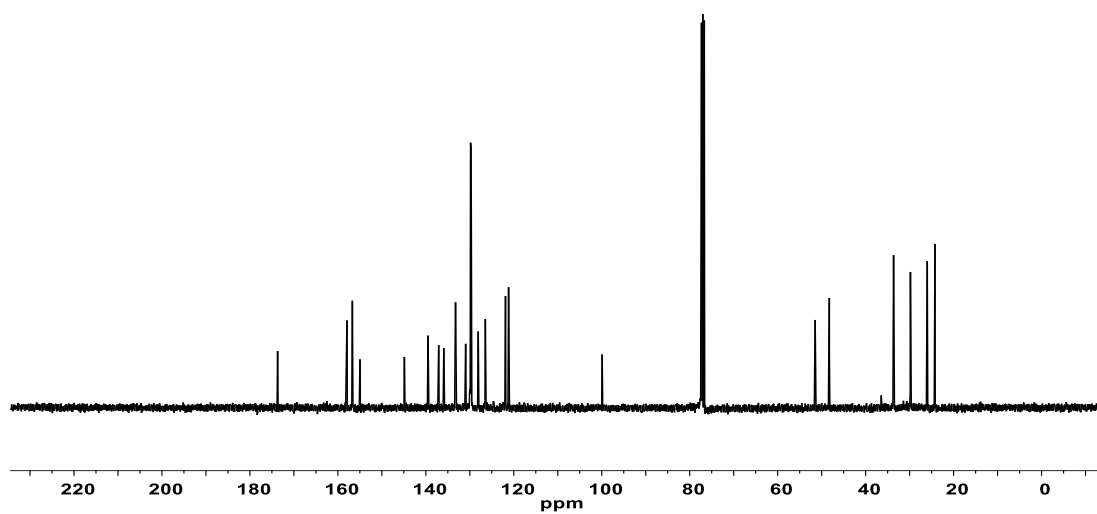

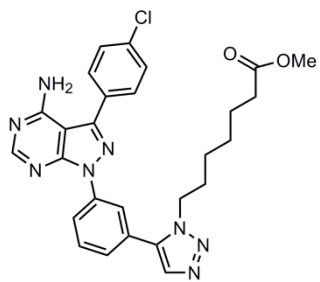

**S3**

Compound **S3**  $^1\text{H}$ :

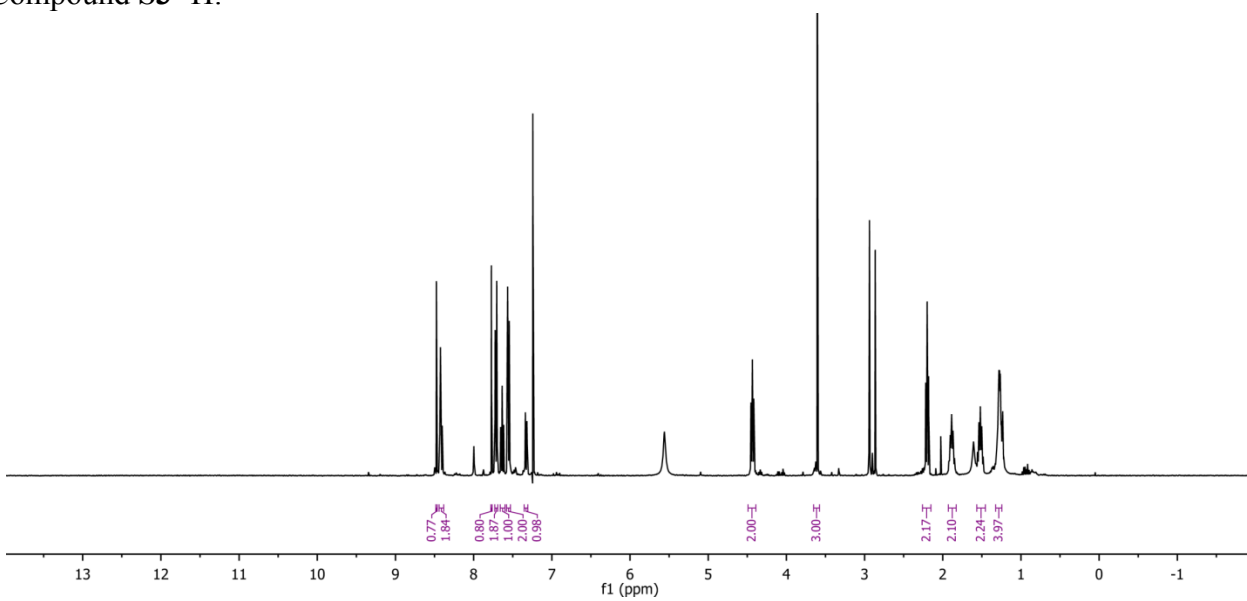

Compound **S3**  $^{13}\text{C}$ :

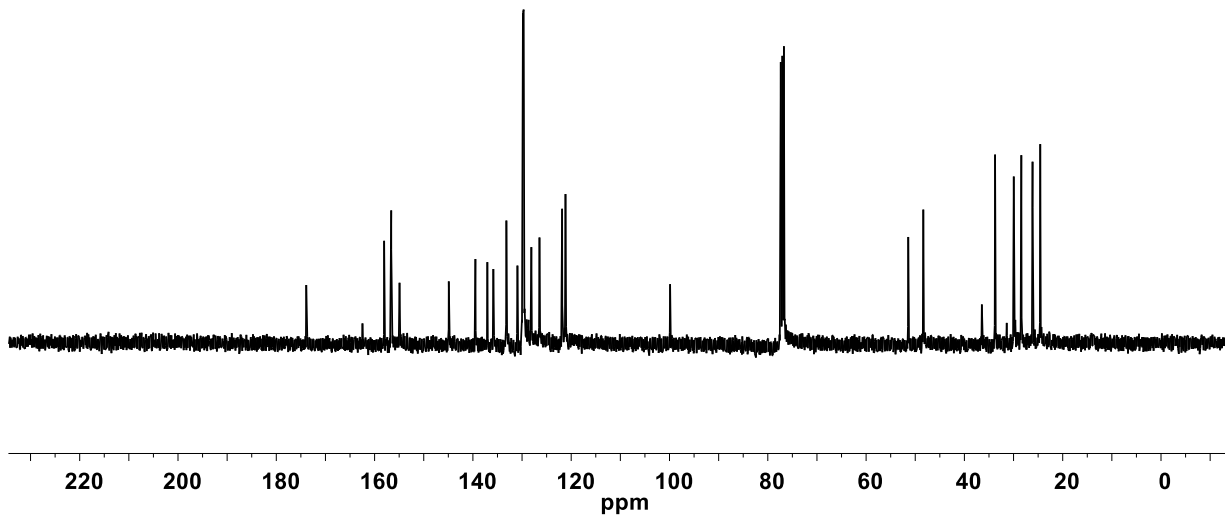

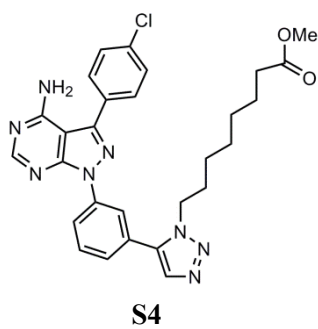

Compound **S4**  $^1\text{H}$ :

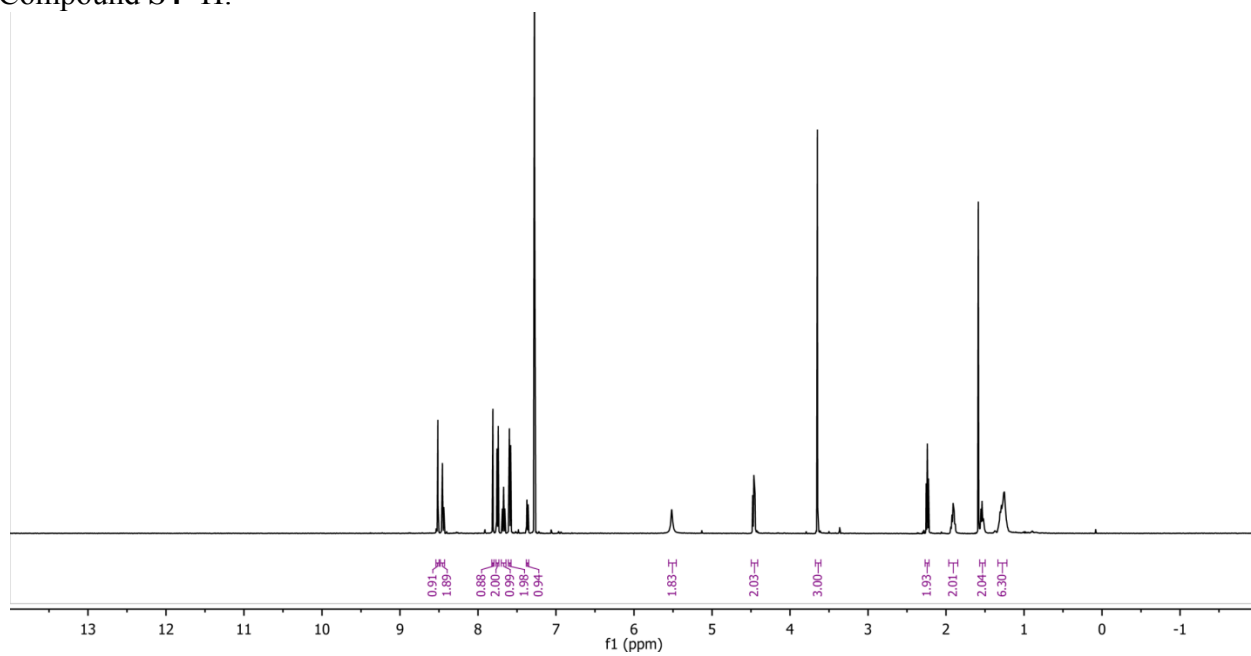

Compound **S4**  $^{13}\text{C}$ :

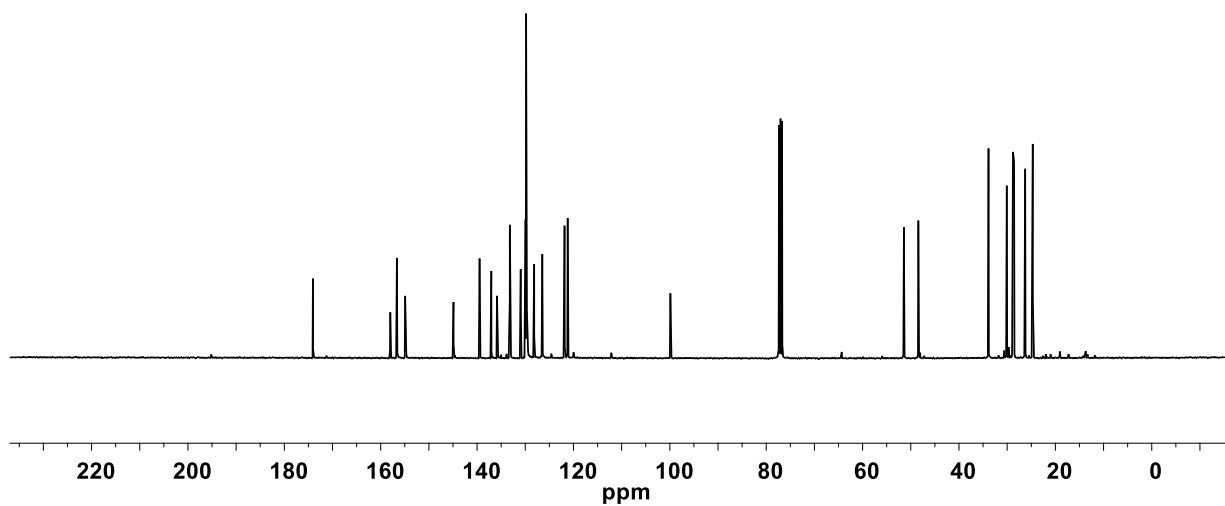

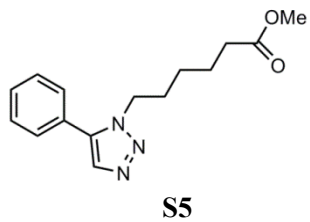

Compound **S5**  $^1\text{H}$ :

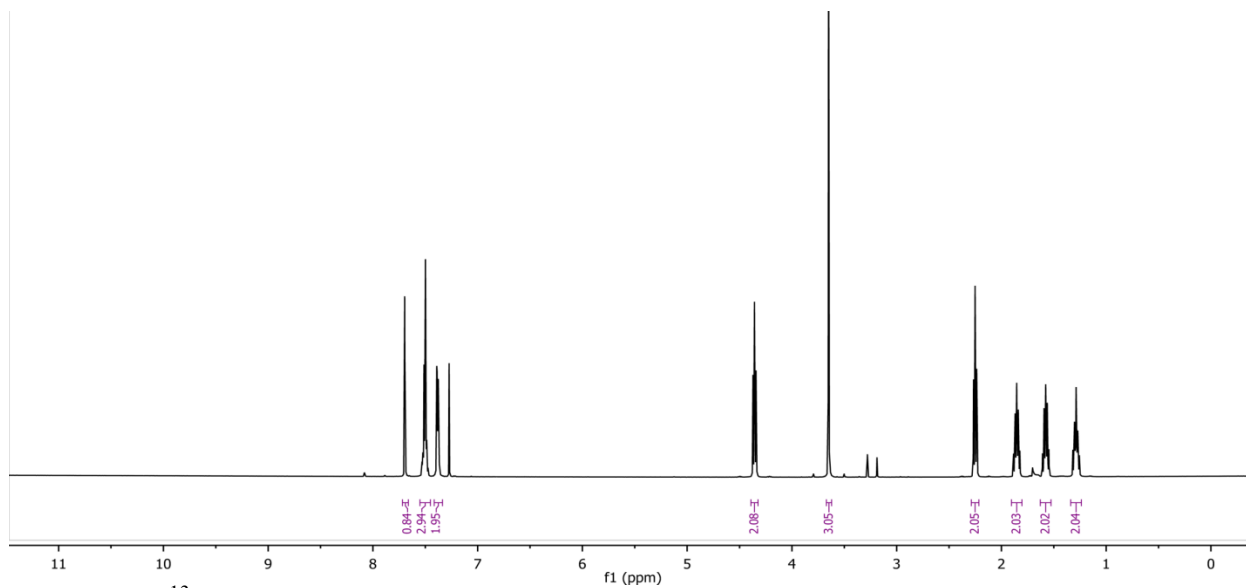

Compound **S5**  $^{13}\text{C}$ :

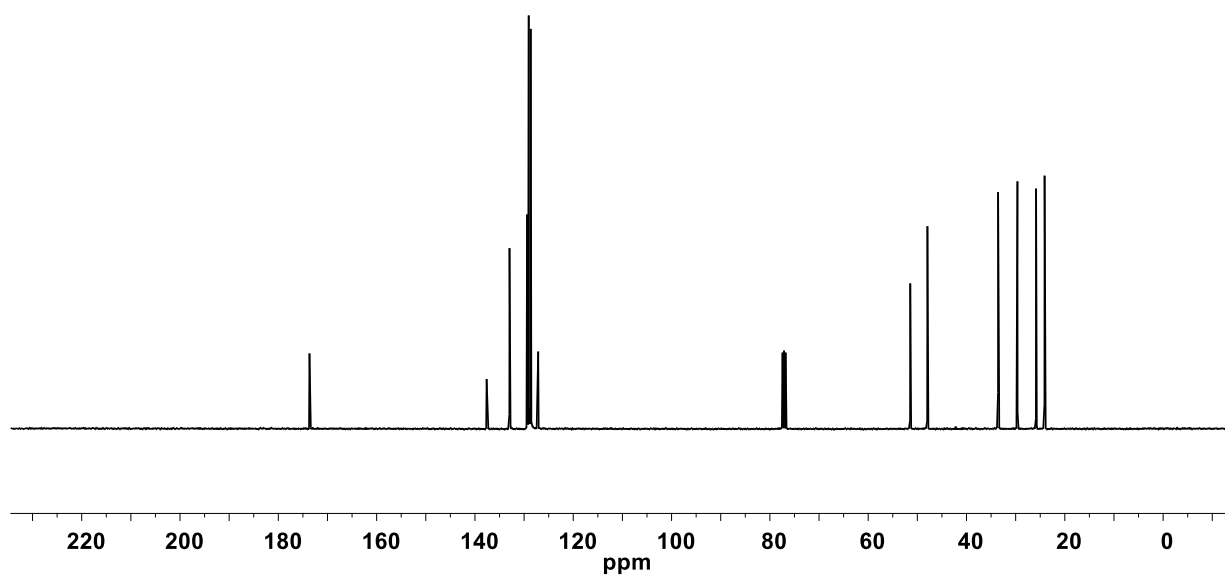

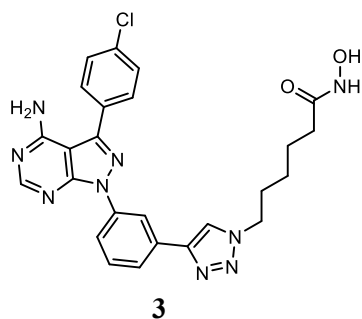

Compound **3**  $^1\text{H}$ :

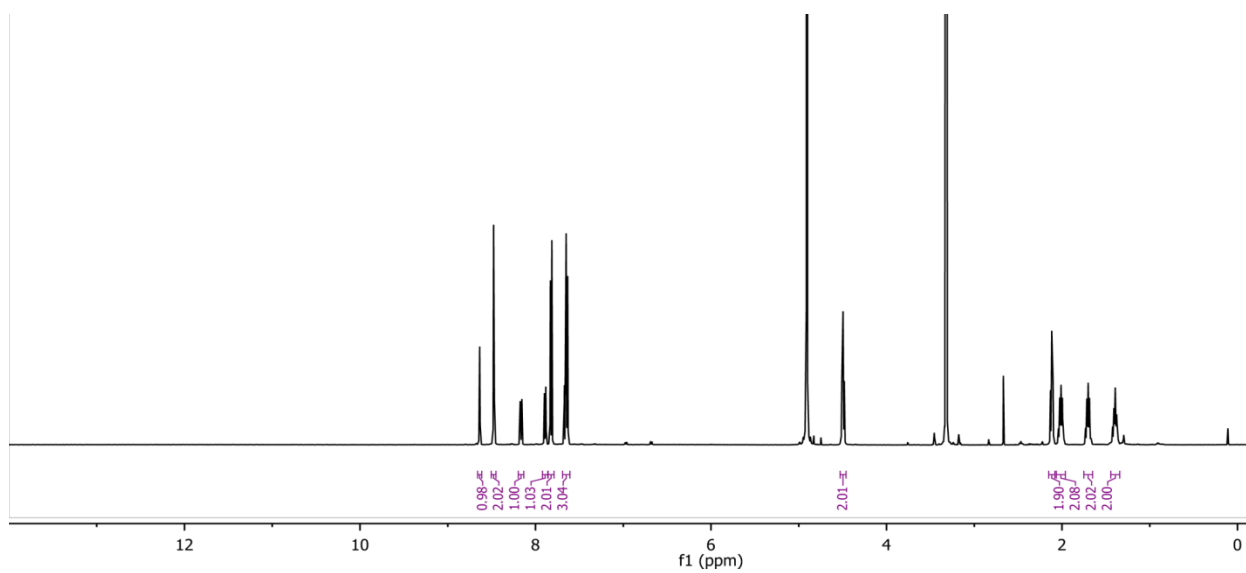

Compound **3**  $^{13}\text{C}$ :

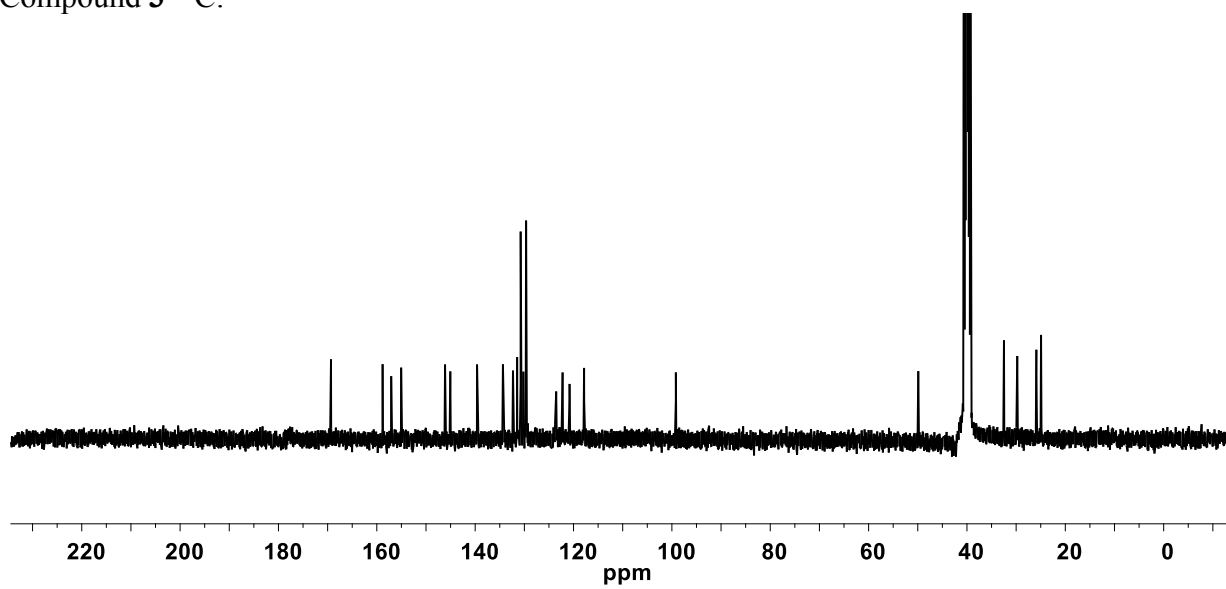

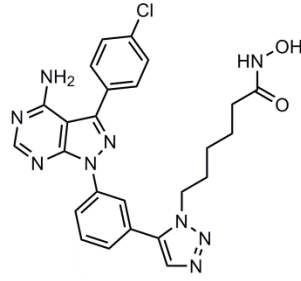

4

Compound 4  $^1\text{H}$ :

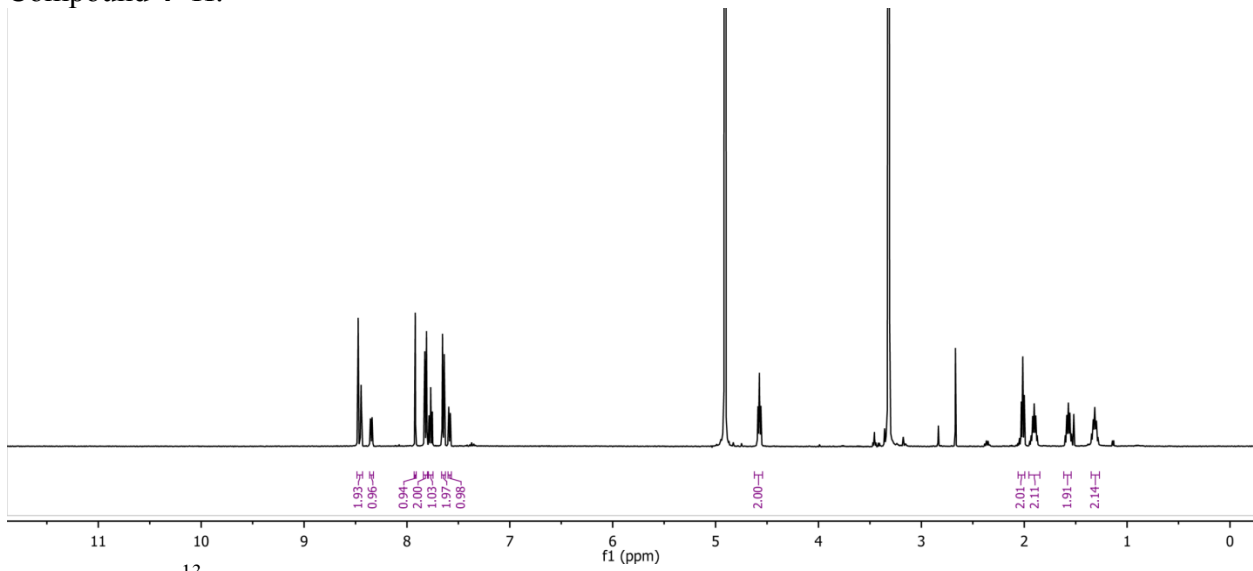

Compound 4  $^{13}\text{C}$ :

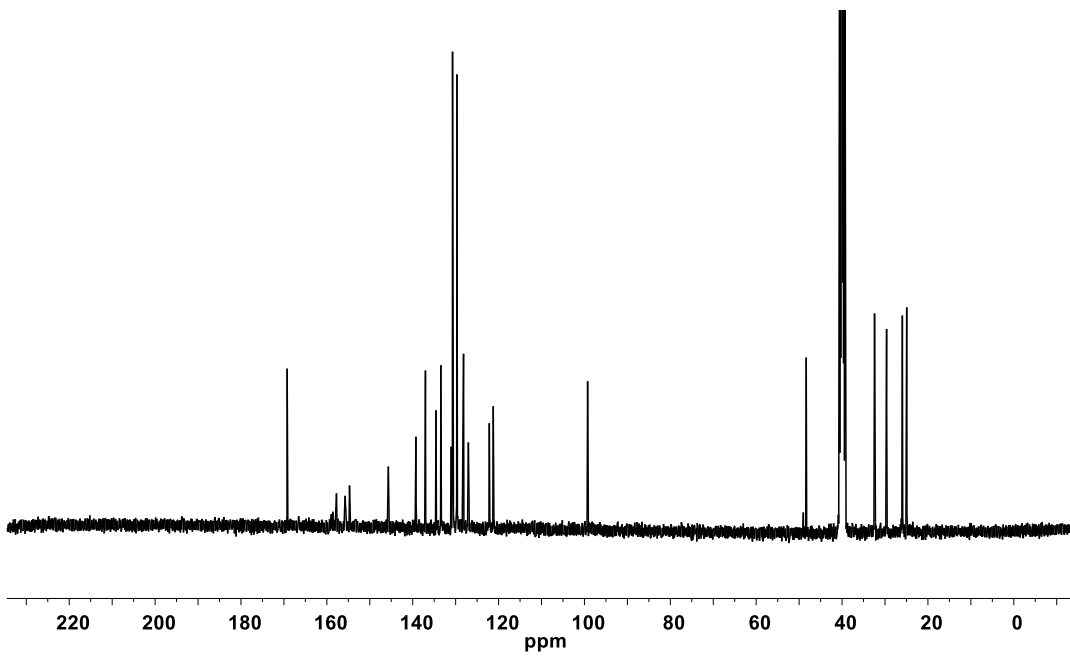

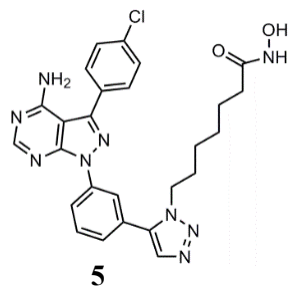

Compound **5**  $^1\text{H}$ :

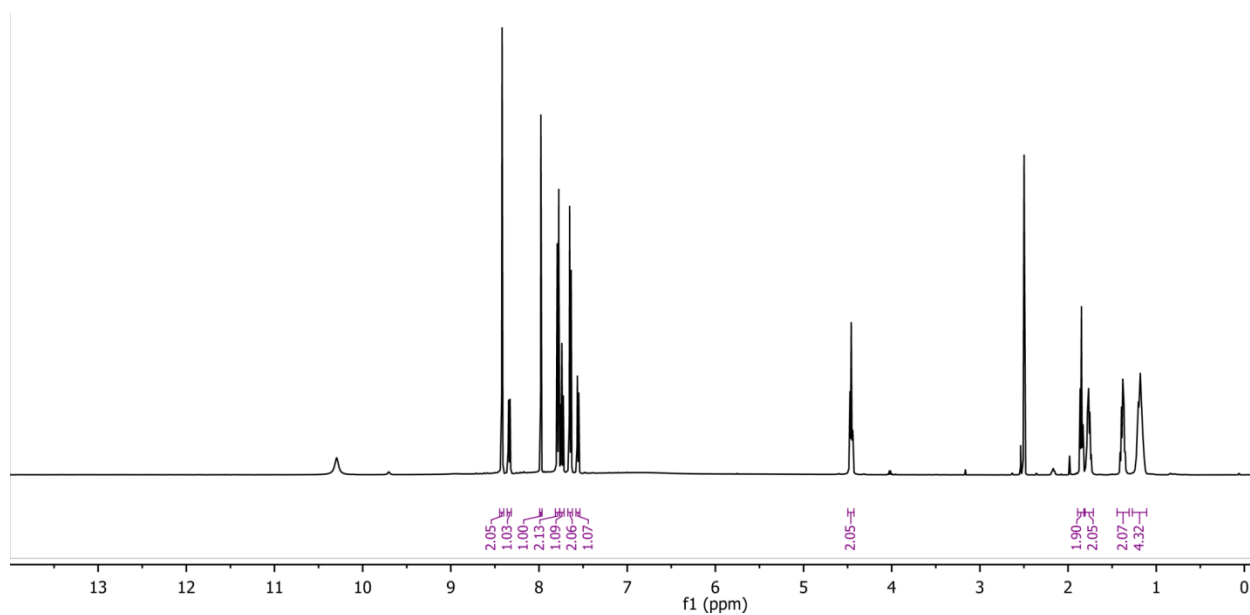

Compound **5**  $^{13}\text{C}$

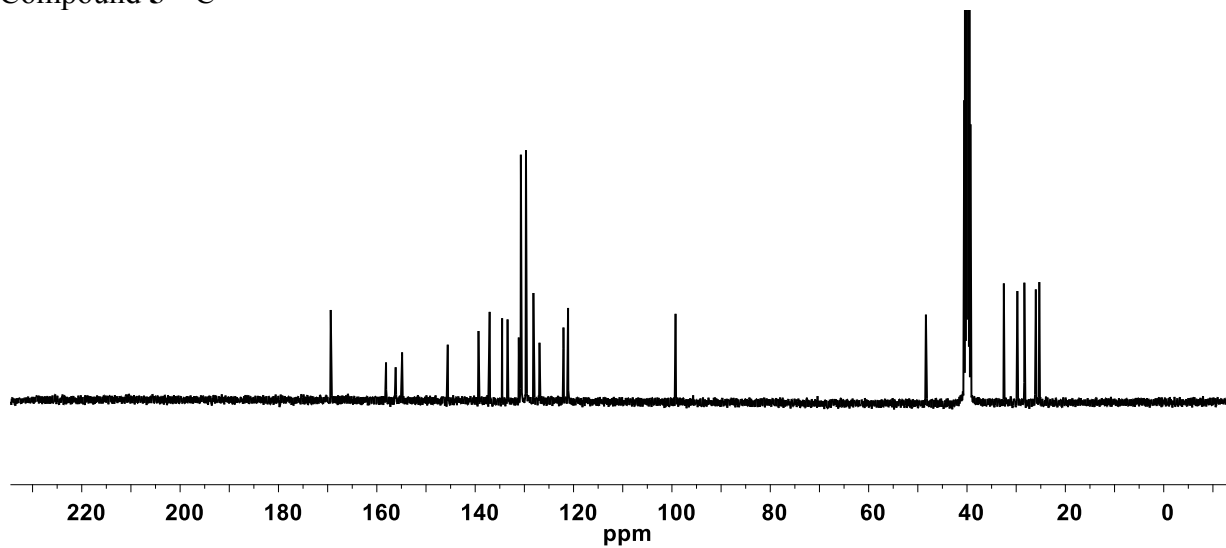

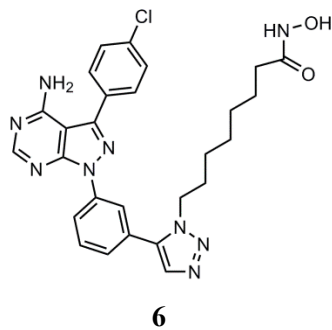

Compound **6**  $^1\text{H}$ :

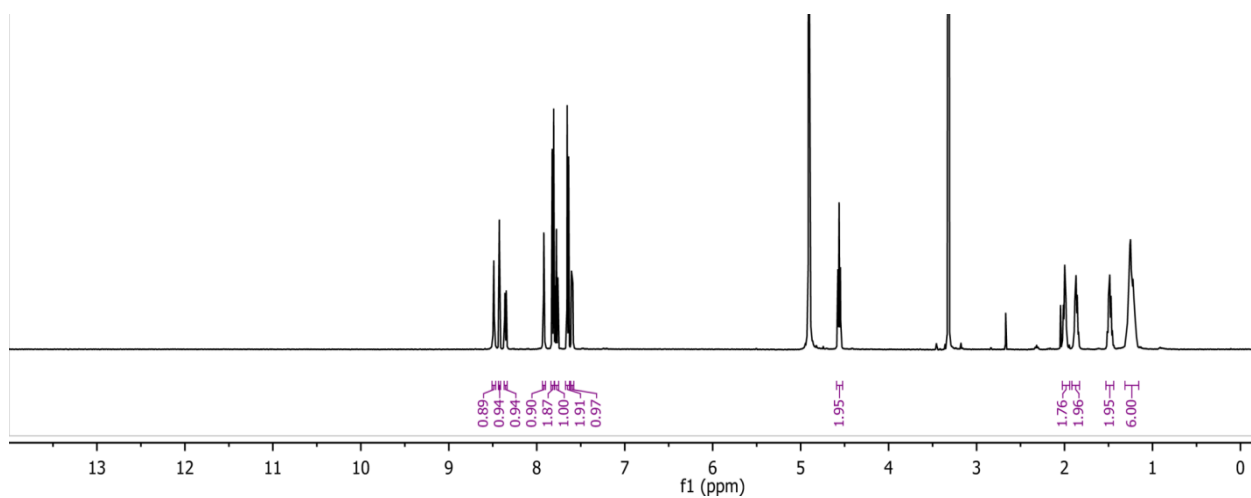

Compound **6**  $^{13}\text{C}$

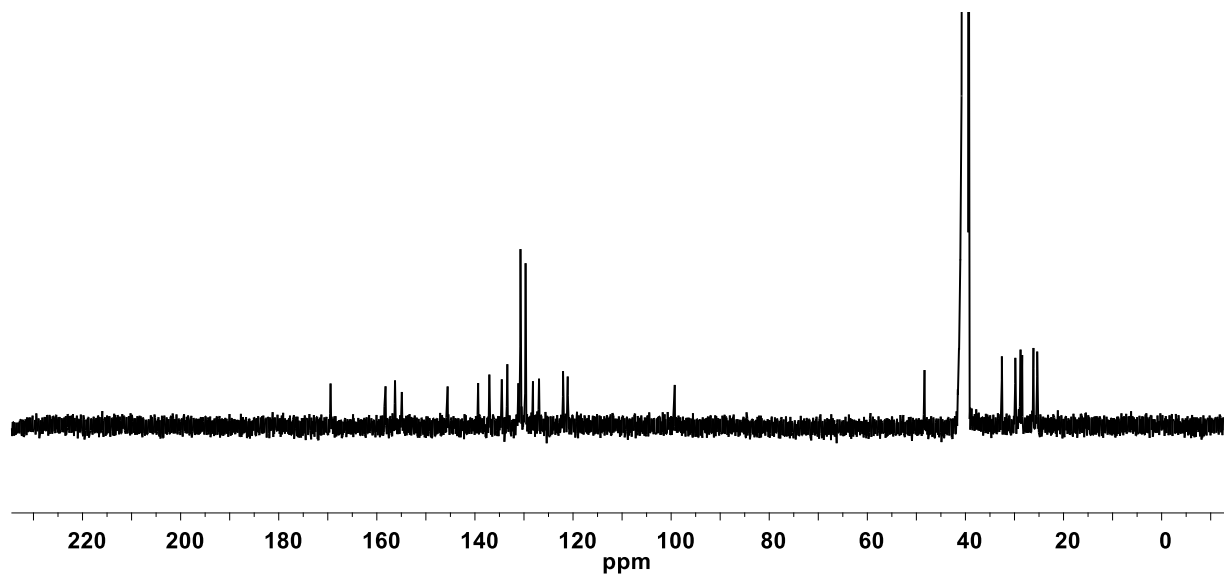



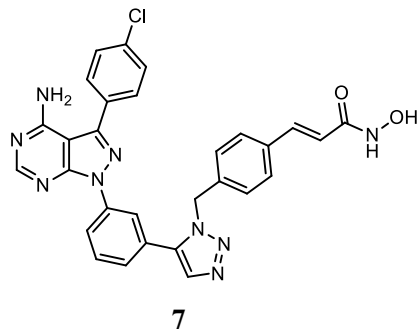

Compound 7 <sup>1</sup>H:

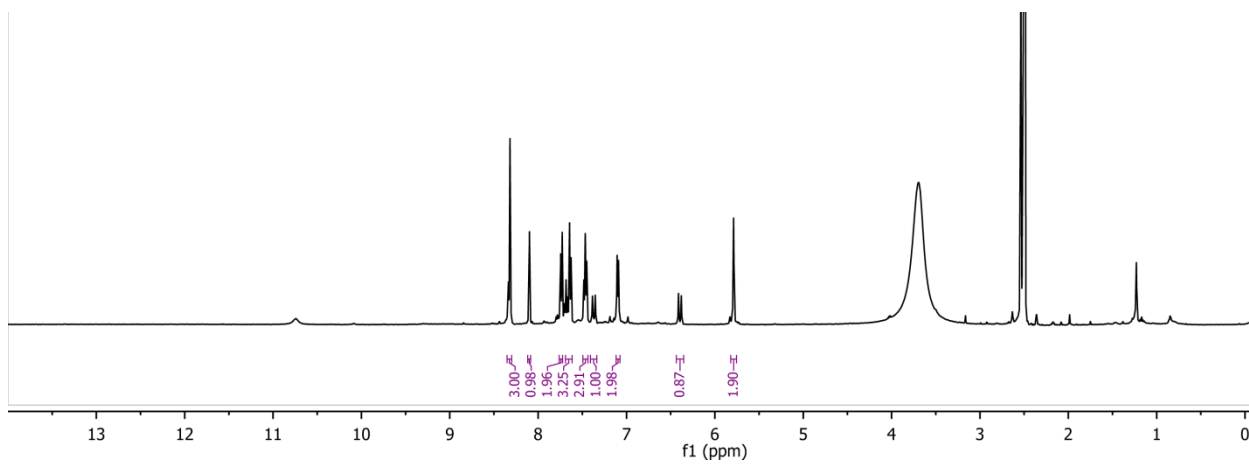

Compound 7 <sup>13</sup>C:

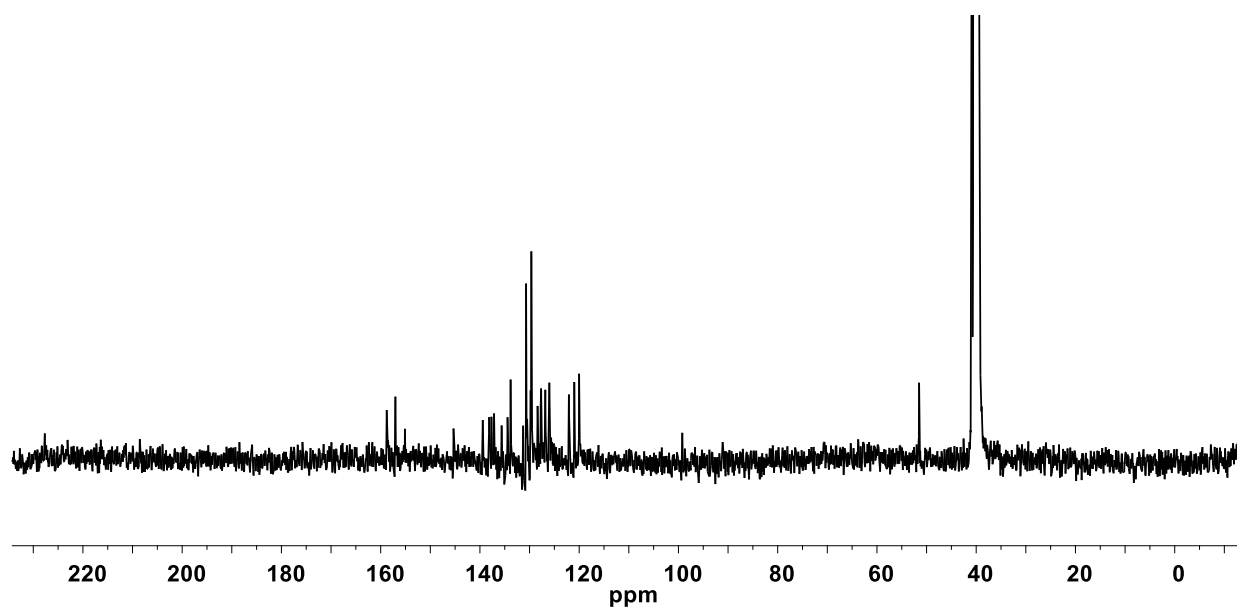

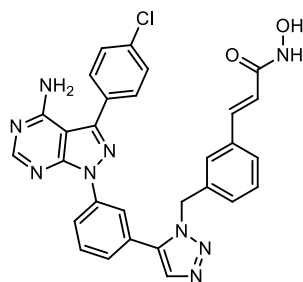

**8**

Compound **8**  $^1\text{H}$ :

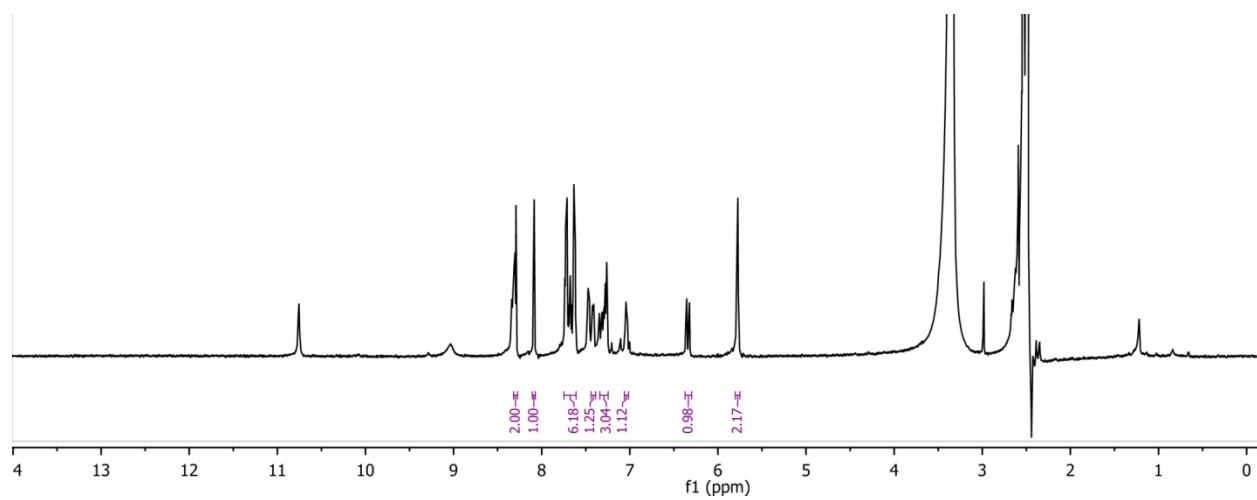

Compound **8**  $^{13}\text{C}$ :

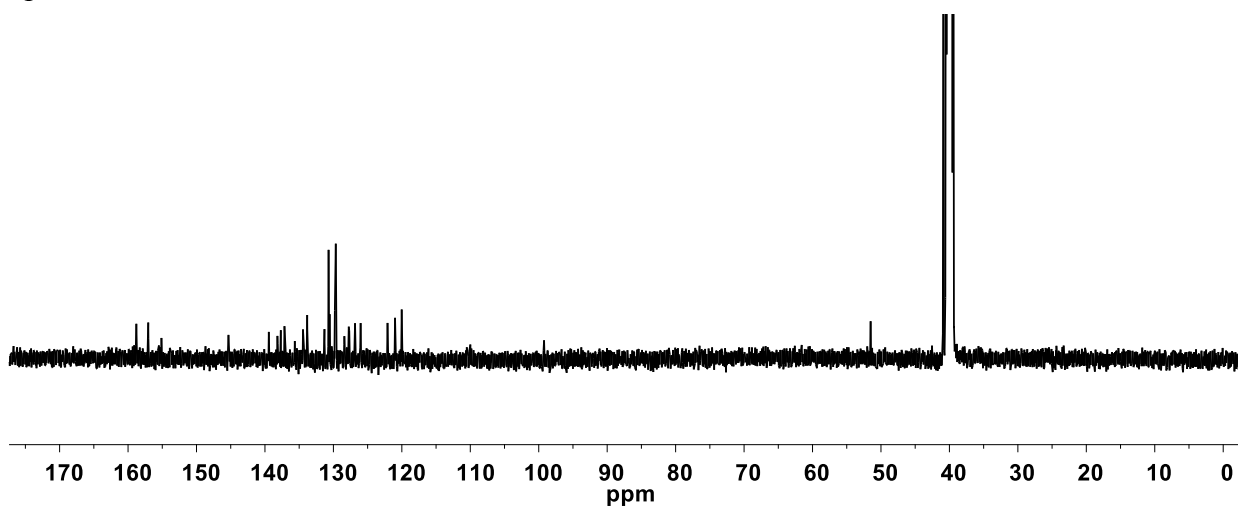

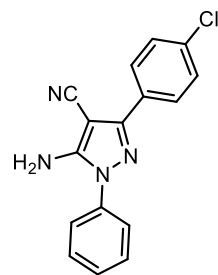

S6

Compound S6  $^1\text{H}$ :

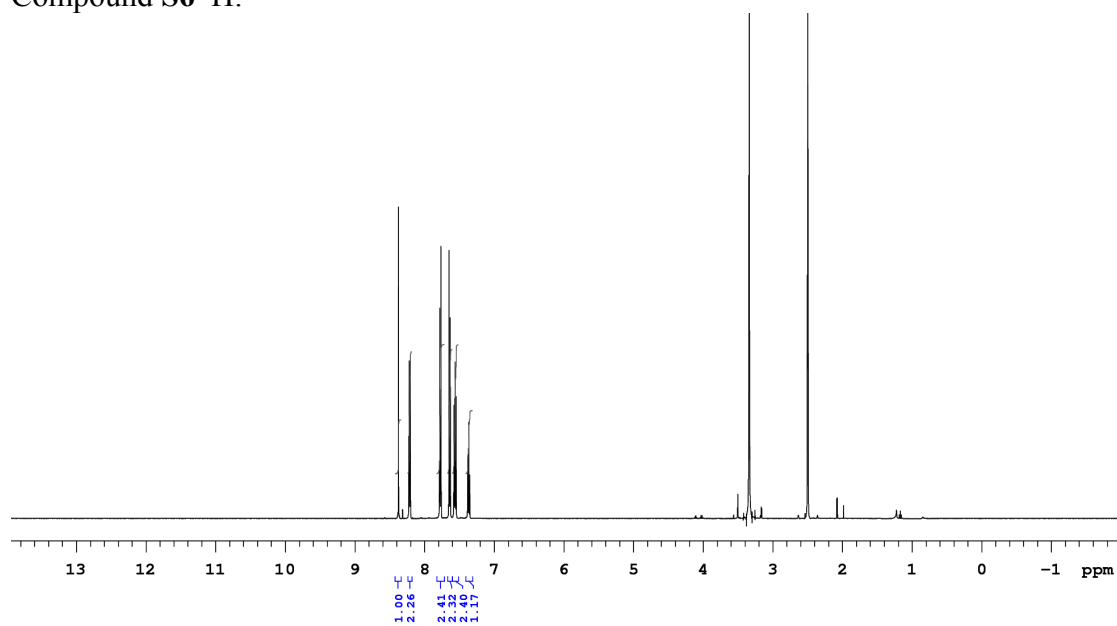

Compound S6  $^{13}\text{C}$ :

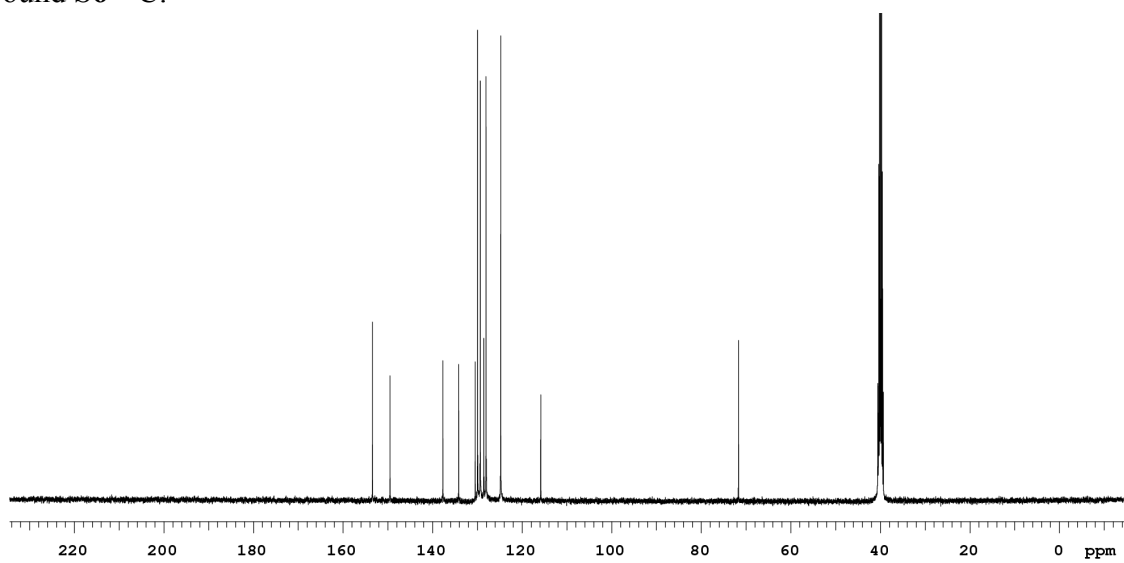

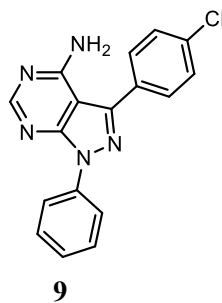

Compound **9**  $^1\text{H}$ :

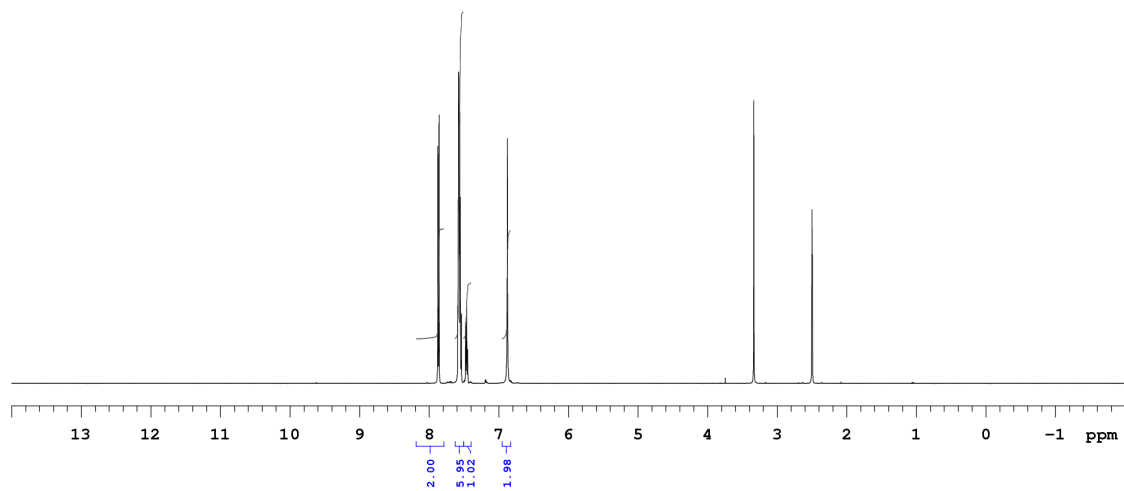

Compound **9**  $^{13}\text{C}$ :

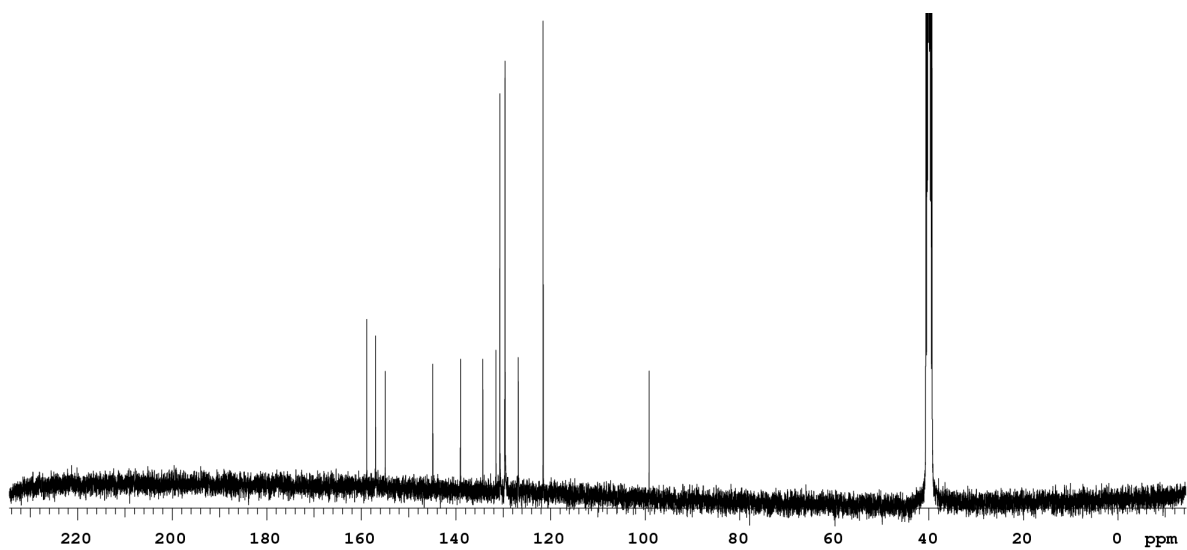

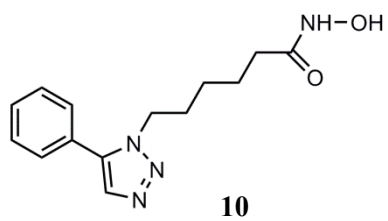

Compound **10**  $^1\text{H}$ :

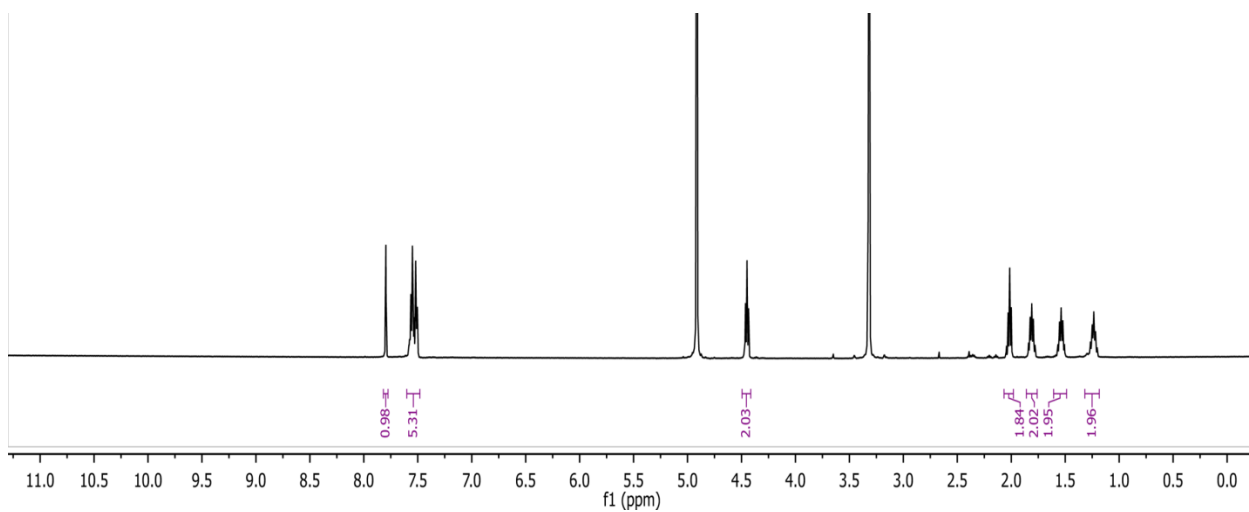

Compound **10**  $^{13}\text{C}$ :

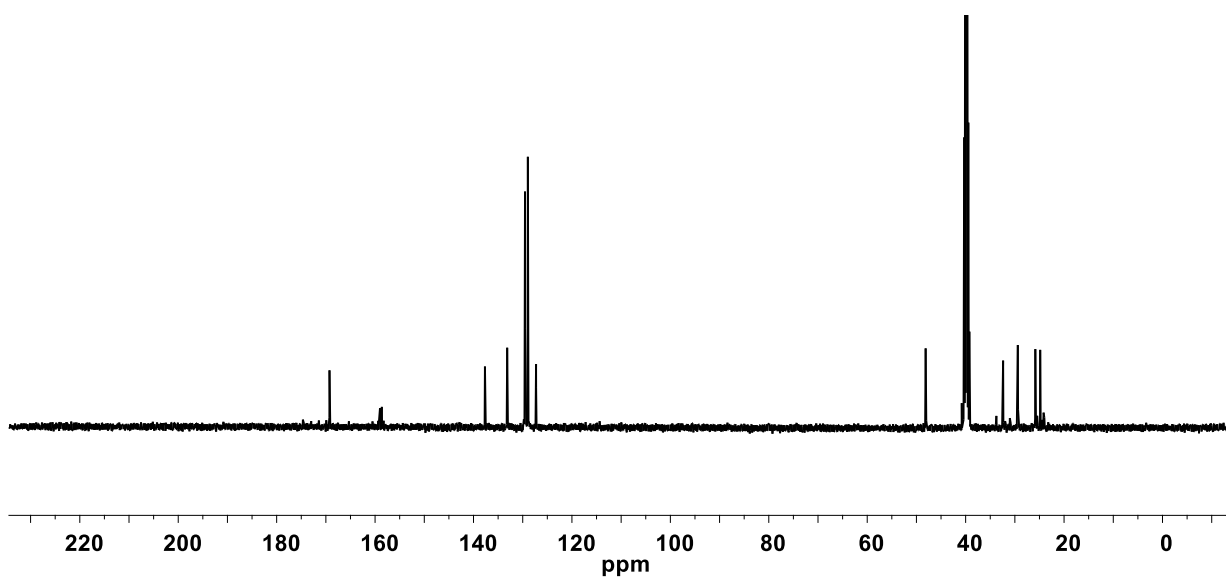

#### IV. BIOCHEMICAL CHARACTERIZATION

Recombinant, human histone deacetylase 1 (HDAC1) was obtained from Cayman Chemicals (Ann Arbor, MI). Trypsin was purchased from Sigma-Aldrich. Black, opaque-bottom 96 well plates were purchased from Nunc. c-Src, c-Abl, and c-Hck were expressed in *E. coli* using previously published procedures.<sup>9</sup>

**General procedure for determination of inhibitor  $K_i$  for c-Src:** c-Src inhibition assay was performed using a continuous, fluorimetric assay as previously described.<sup>4</sup> Reaction volumes of 100  $\mu$ L were used in 96-well plates. To each well was added 85  $\mu$ L of buffer + enzyme. 2.5  $\mu$ L of varying concentrations of inhibitor was then added (typically 10000, 2500, 625, 156, 39, 10, 2.4, 0.61, 0.15, 0  $\mu$ M in DMSO). 2.5  $\mu$ L of peptide substrate (“compound 3” as described in Wang et. al.)<sup>4</sup> solution (1.8 mM in DMSO) was added. 10  $\mu$ L of ATP (1 mM in water) was added to initiate the reaction and was immediately monitored at 405 nm (ex. 340 nm) for 10 minutes. Final concentrations in the reaction are 30 nM enzyme, 45  $\mu$ M peptide substrate, 100  $\mu$ M ATP, 100  $\mu$ M  $\text{Na}_3\text{VO}_4$ , 100 mM Tris buffer (pH 8), 10 mM  $\text{MgCl}_2$ , 0.01% Triton X-100. The initial rate of the reaction was used to determine  $K_i$  values. For  $K_i$  determination, the kinetic values were obtained directly from nonlinear regression of substrate-velocity curves in the presence of various concentrations of the inhibitor. The equation  $Y = \text{Bottom} + (\text{Top} - \text{Bottom}) / (1 + 10^{\text{X} - \text{LogIC}_{50}})$ ,  $X = \log(\text{concentration})$  and  $Y = \% \text{ activity}$ ; was used in the nonlinear regression.

**General procedure for determination of inhibitor  $K_i$  for HDAC1:** HDAC1 assay was performed in a fluorescence assay in 96-well plates with a reaction volume of 100  $\mu$ L as was previously described.<sup>5</sup> To each well was added buffer (75  $\mu$ L), trypsin (10  $\mu$ L), and HDAC1 enzyme (10  $\mu$ L). 2.5  $\mu$ L of varying concentrations of inhibitor was then added (typically 781, 195, 49, 12, 3, 0.76, 0.19, 0.05, 0.01, 0.003, 0 nM in DMSO). 2.5  $\mu$ L of peptide substrate (Ac-Leu-Gly-Lys(Ac)AMCA) solution (2 mM in DMSO) was added to initiate the reaction and was monitored at 370 nm (ex. 455 nm) for 30 min. after a 30 min. lag phase. Final concentrations in the reaction are 400 pM HDAC 1, 1 mM trypsin, 50 mM peptide substrate ( $K_M = 39.5$   $\mu$ M), 15 mM Tris buffer (pH 8.1), 250 mM EDTA, 250 mM NaCl, 10% glycerol, and 0.01% Triton X-100. The initial rate of the reaction was used to determine  $K_i$  values. For  $K_i$  determination, the kinetic values were obtained directly from nonlinear regression of substrate-velocity curves in the presence of various concentrations of the inhibitor. The equation  $Y = \text{Bottom} + (\text{Top} - \text{Bottom}) / (1 + 10^{\text{X} - \text{LogIC}_{50}})$ ,  $X = \log(\text{concentration})$  and  $Y = \% \text{ activity}$ ; was used in the nonlinear regression.

**Analytical data for  $K_i$  determination.** Each inhibitor  $K_i$  value was determined using at least 3 independent measurements. An example curve is provided for each inhibitor along with average  $K_i \pm$  standard deviation.

**c-Src Assay Data:**

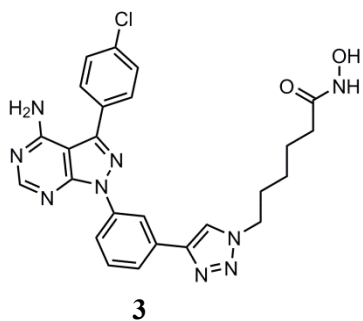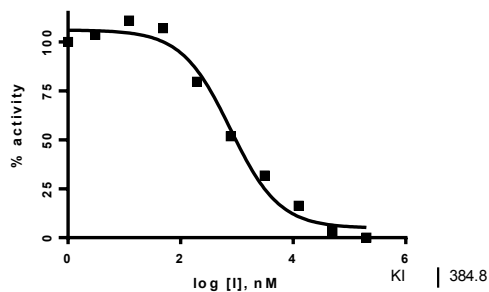

Avg  $K_i = 371 \pm 12.0$  nM

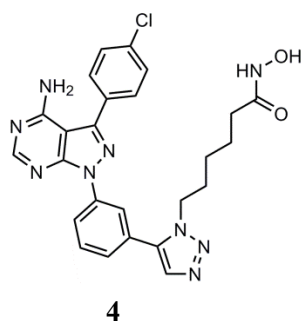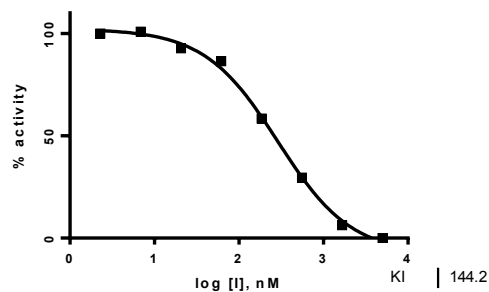

Avg  $K_i = 138 \pm 14.6$  nM

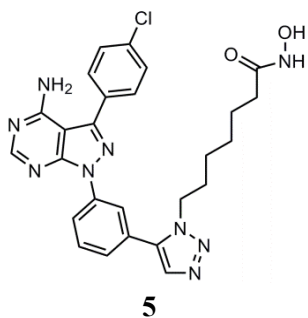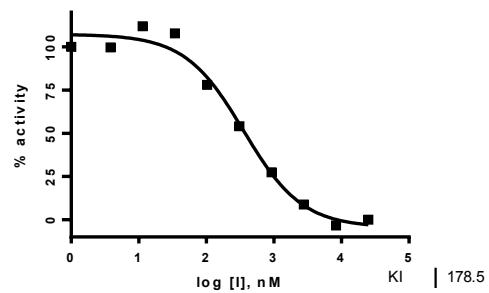

Avg  $K_i = 190 \pm 23.0$  nM

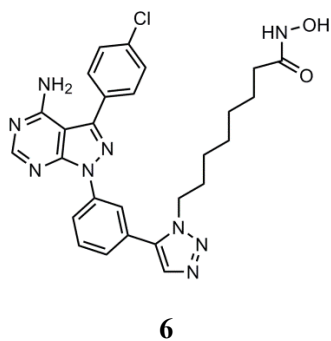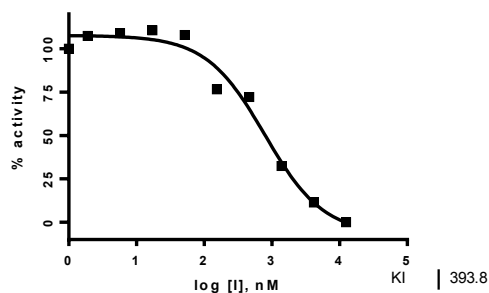

Avg  $K_i = 407 \pm 46.0$  nM

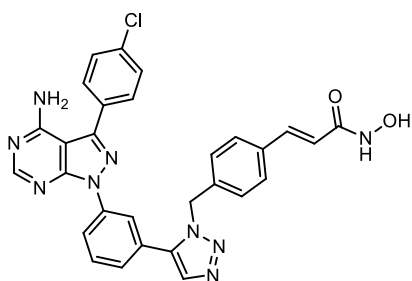

7

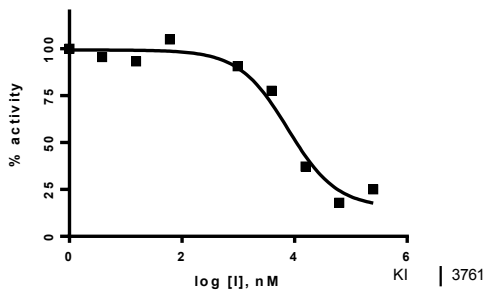

Avg  $K_i = 4305 \pm 444$  nM

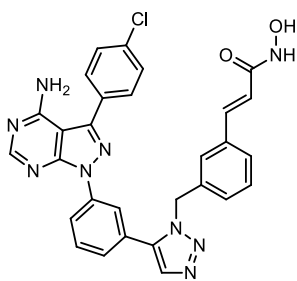

8

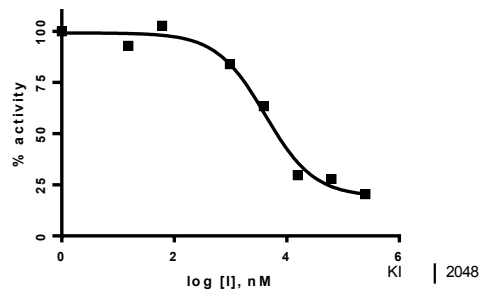

Avg  $K_i = 2136 \pm 393$  nM

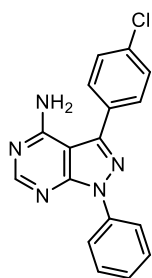

9

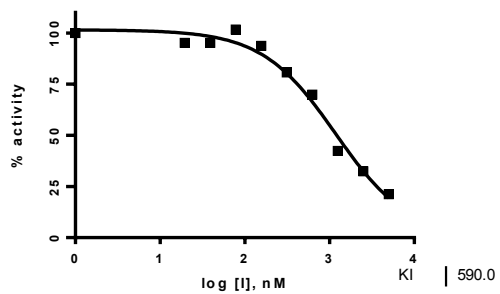

Avg  $K_i = 605 \pm 90$  nM



## HDAC1 Assay Data:

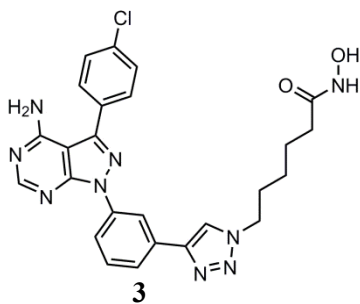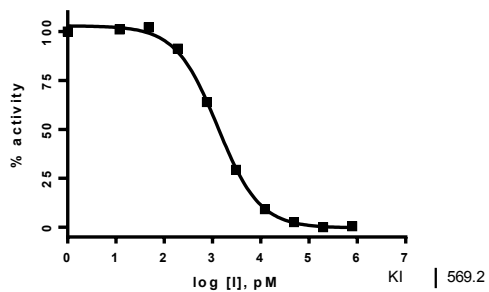

Avg  $K_i = 621 \pm 46$  pM

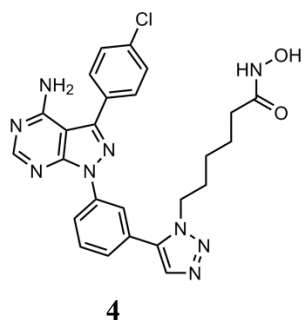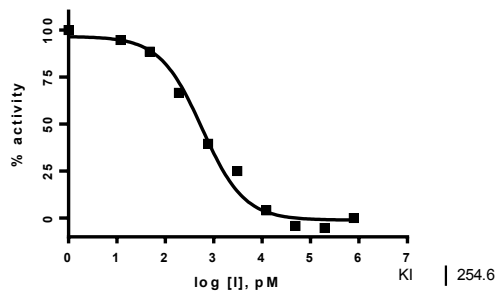

Avg  $K_i = 256 \pm 22$  pM

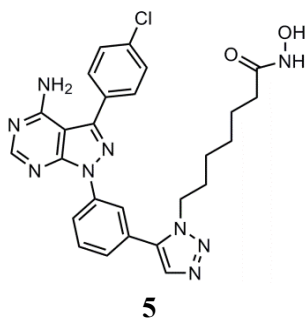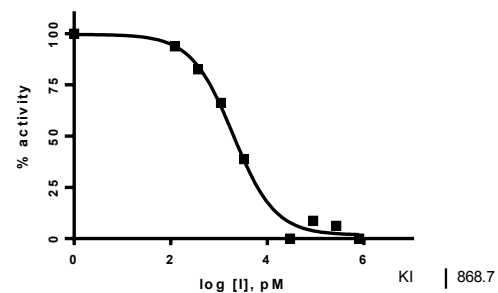

Avg  $K_i = 820 \pm 285$  pM

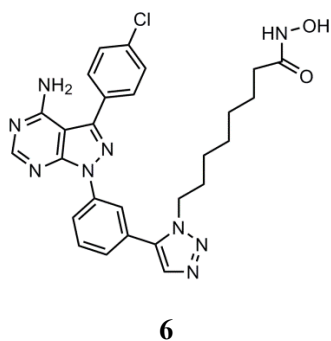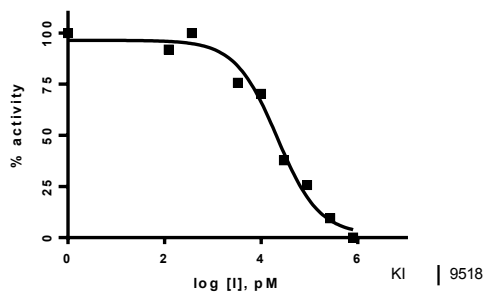

Avg  $K_i = 9800 \pm 804$  pM



7

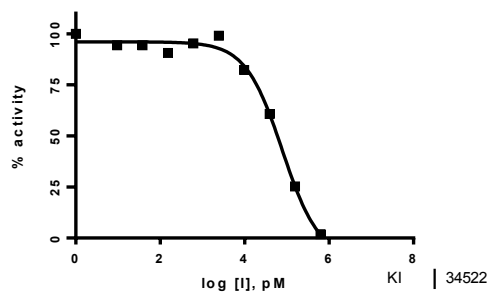

Avg  $K_i = 35 \pm 0.6$  nM



8

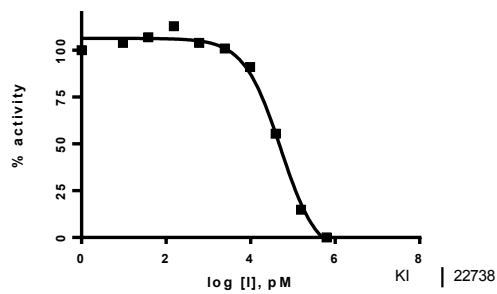

Avg  $K_i = 23 \pm 1.5$  nM

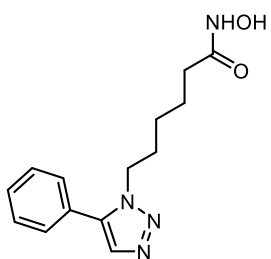

10

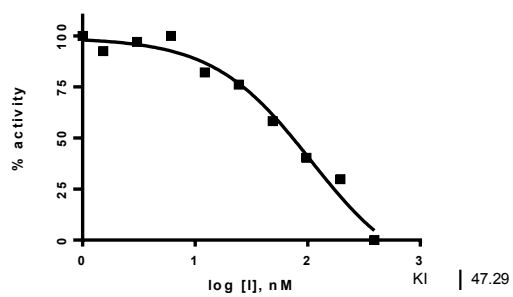

Avg  $K_i = 45 \pm 1.6$  nM

**c-Abl Assay Data:**

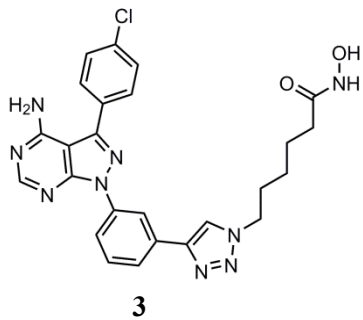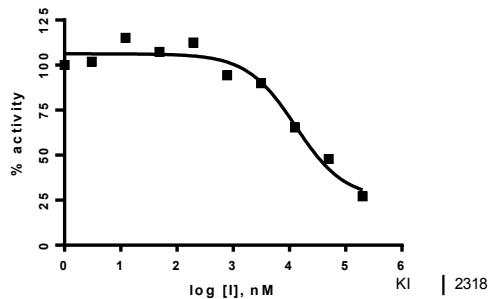

Avg K<sub>i</sub> = 2929 ± 1190 nM

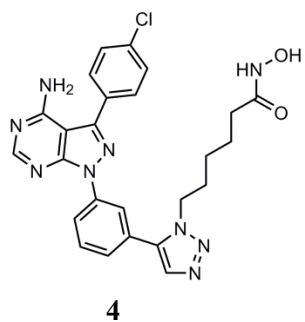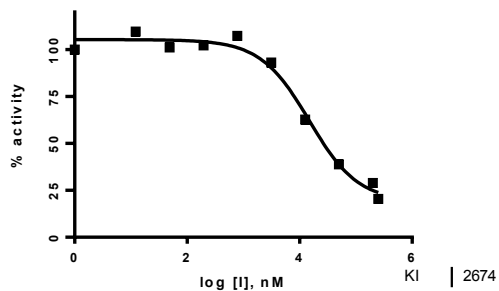

Avg K<sub>i</sub> = 2347 ± 249 nM

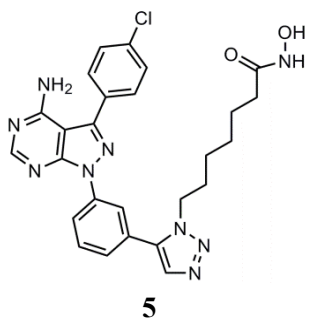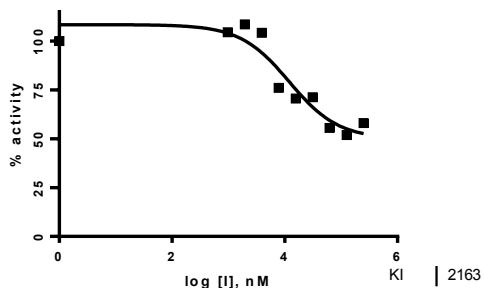

Avg K<sub>i</sub> = 1866 ± 147 nM

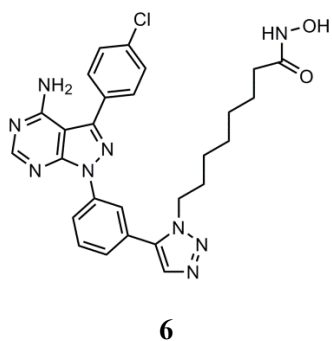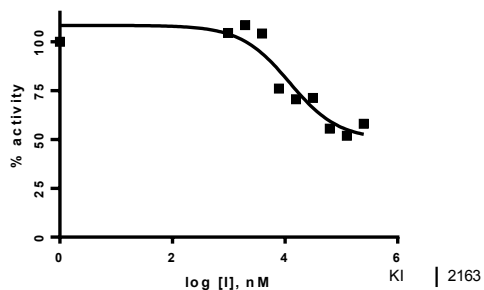

Avg K<sub>i</sub> = 1659 ± 336 nM

### c-Hck Assay Data:

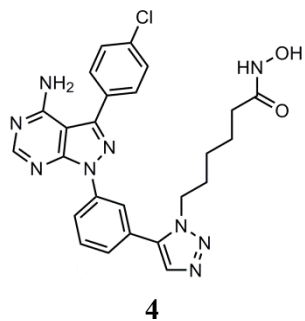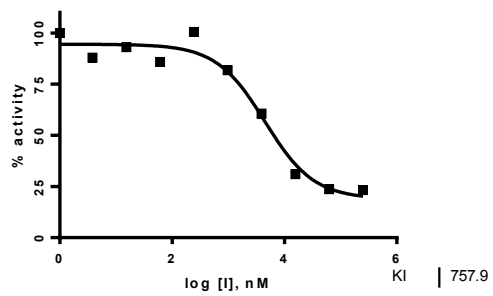

1Avg  $K_i = 504 \pm 172$  nM

## V. Analytical HPLC trace for Compounds 3-10

Compounds were dissolved in 100% DMSO to 1 mM final concentration. An aliquot (10  $\mu$ L) was injected into a Waters© Xbridge C18 column (2.1 x 100 mm) and eluted using both a linear gradient of CH<sub>3</sub>CN (5-95%) in H<sub>2</sub>O over 15 min or CH<sub>3</sub>OH (5-95%) in H<sub>2</sub>O over 15 min at a flow rate of 0.5 mL/min and monitored at 254 nm unless otherwise stated. The peak eluted before 2 min. is the DMSO injection peak.

Compound 3 5-95% CH<sub>3</sub>CN/H<sub>2</sub>O gradient:

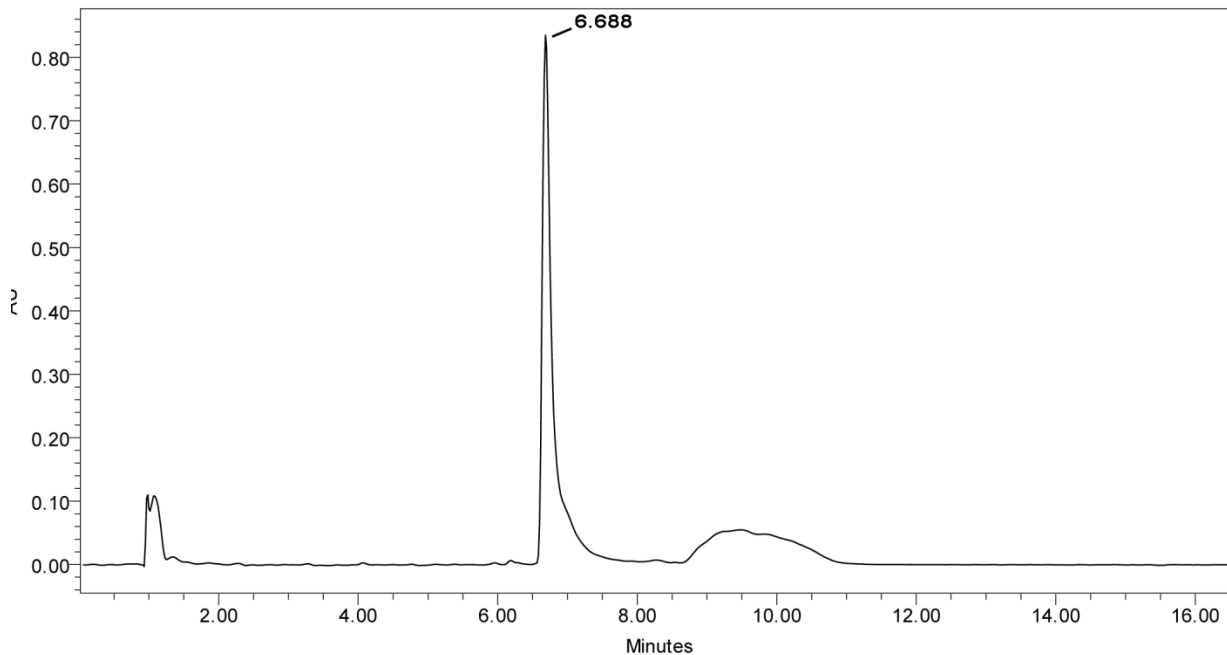

Compound 3 5-95% CH<sub>3</sub>OH/H<sub>2</sub>O gradient:

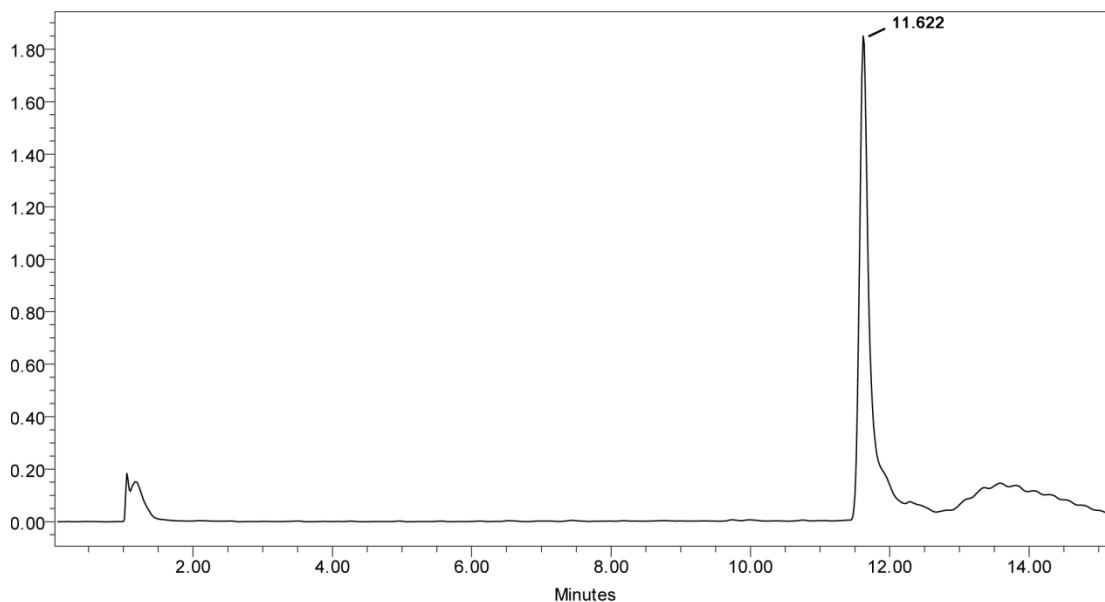

Compound 4 5-95% CH<sub>3</sub>CN/H<sub>2</sub>O gradient:

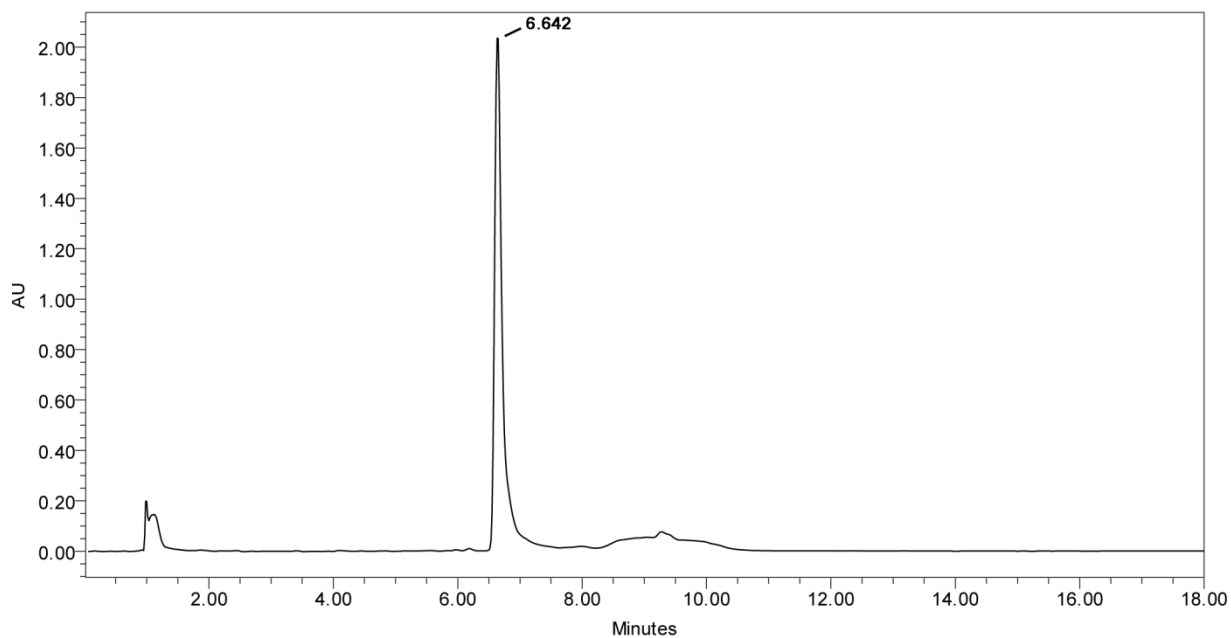

Compound 4 5-95% CH<sub>3</sub>OH/H<sub>2</sub>O gradient

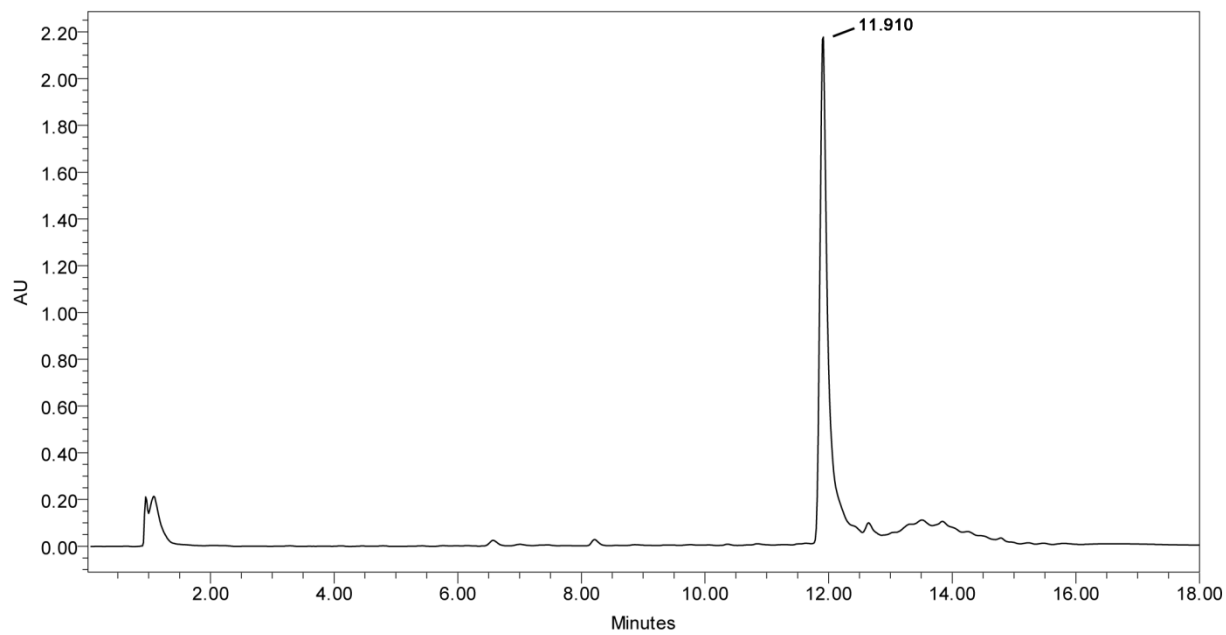

Compound **5** 5-95% CH<sub>3</sub>CN/H<sub>2</sub>O gradient:

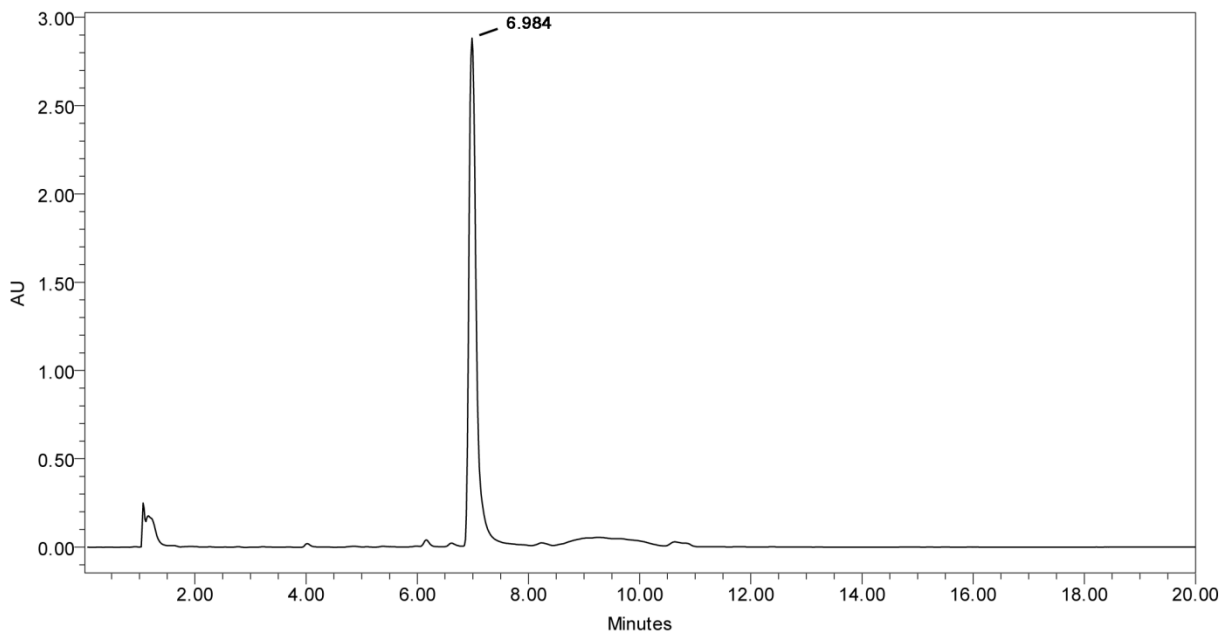

Compound **5** 5-95% CH<sub>3</sub>OH/H<sub>2</sub>O gradient:

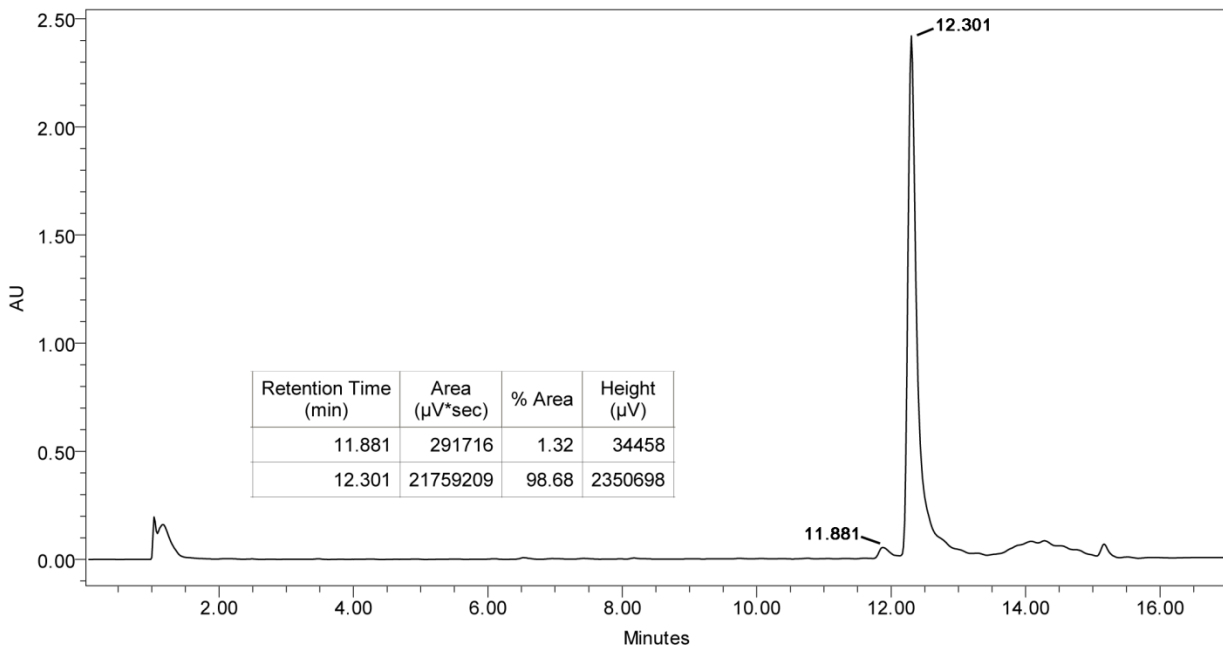

Compound 6 5-95% CH<sub>3</sub>CN/H<sub>2</sub>O gradient:

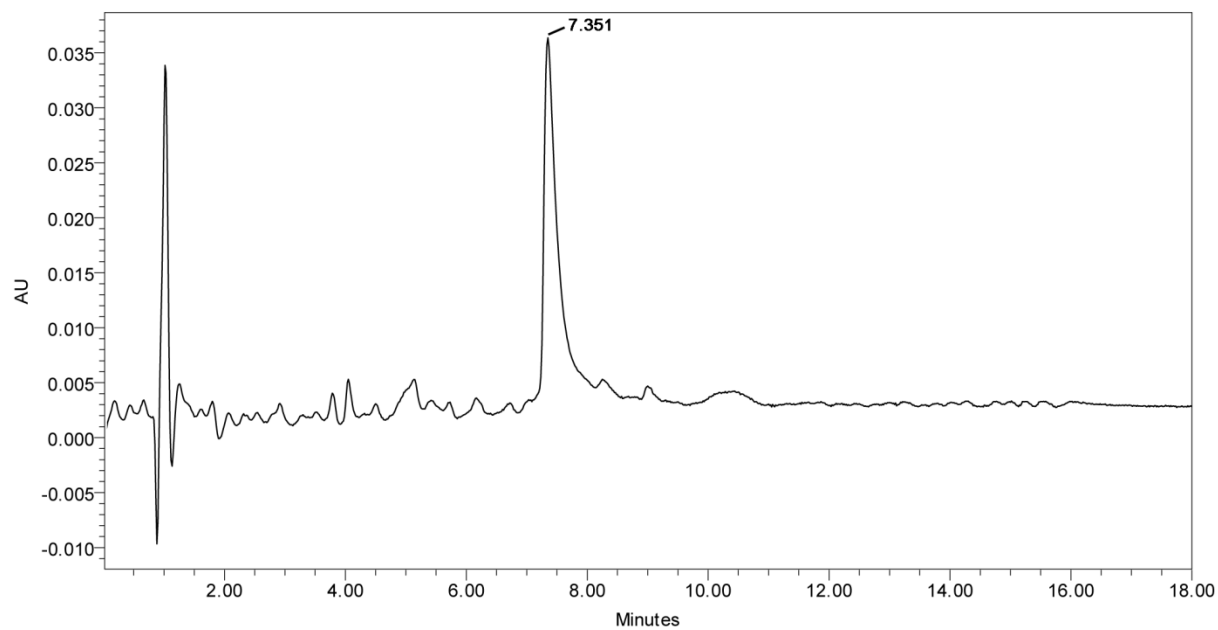

Compound 6 5-95% CH<sub>3</sub>OH/H<sub>2</sub>O gradient:

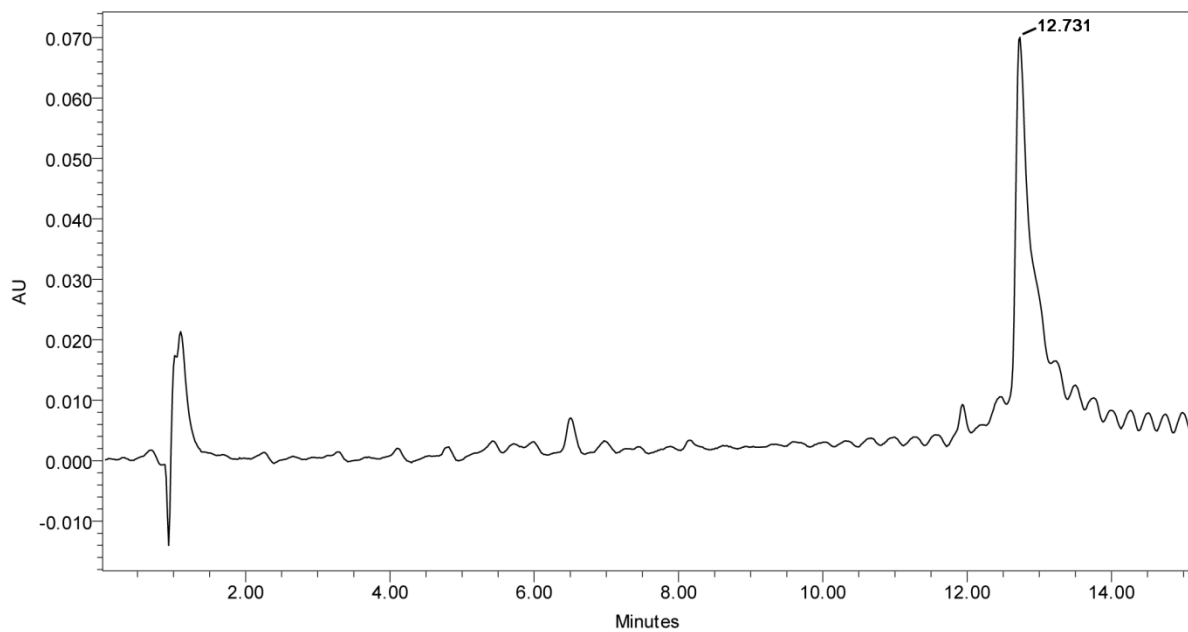



Compound 7 5-95% CH<sub>3</sub>OH/H<sub>2</sub>O gradient:

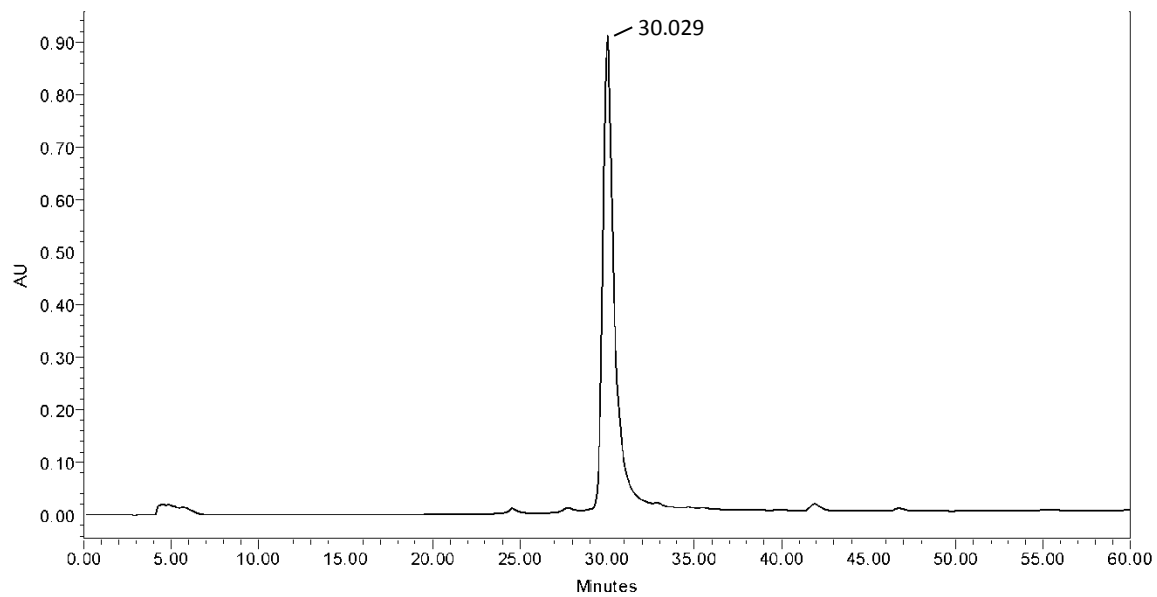

Compound 8 5-95% CH<sub>3</sub>CN/H<sub>2</sub>O gradient:

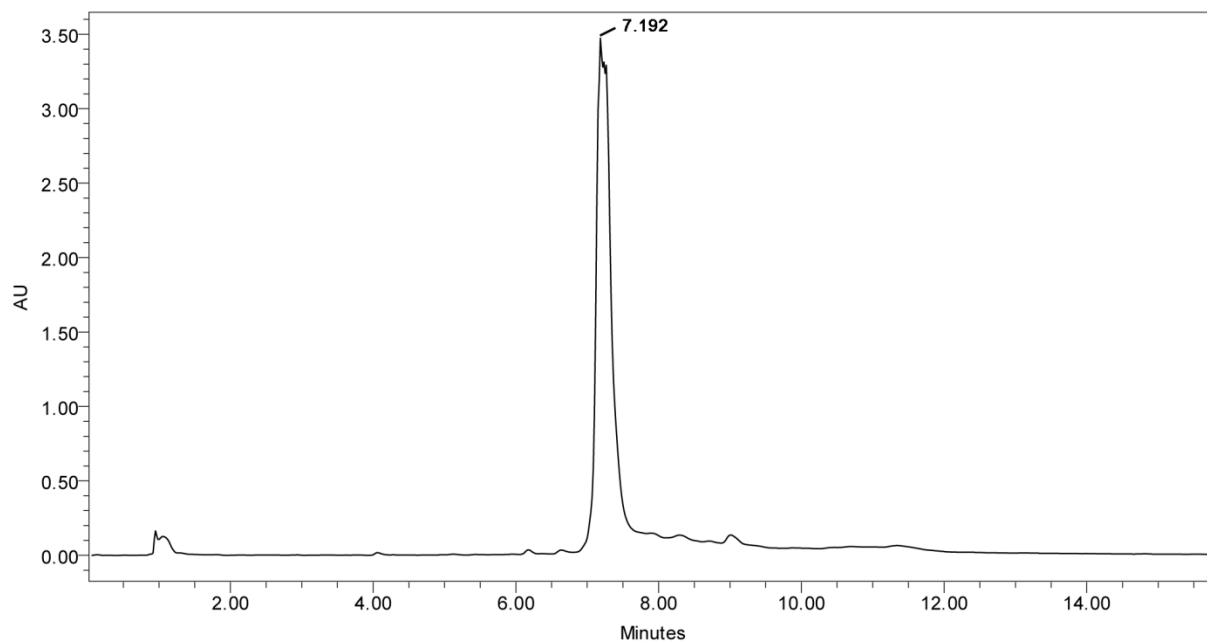

Compound **8** 5-95% CH<sub>3</sub>OH/H<sub>2</sub>O gradient:

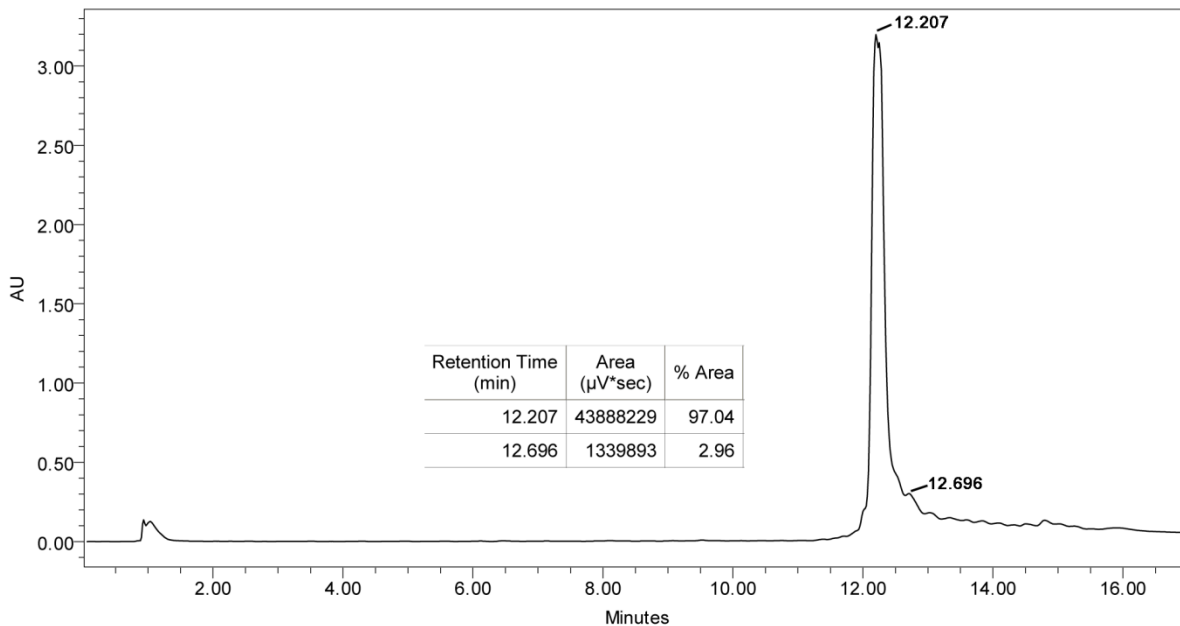

Compound **9** 5-95% CH<sub>3</sub>CN/H<sub>2</sub>O gradient:

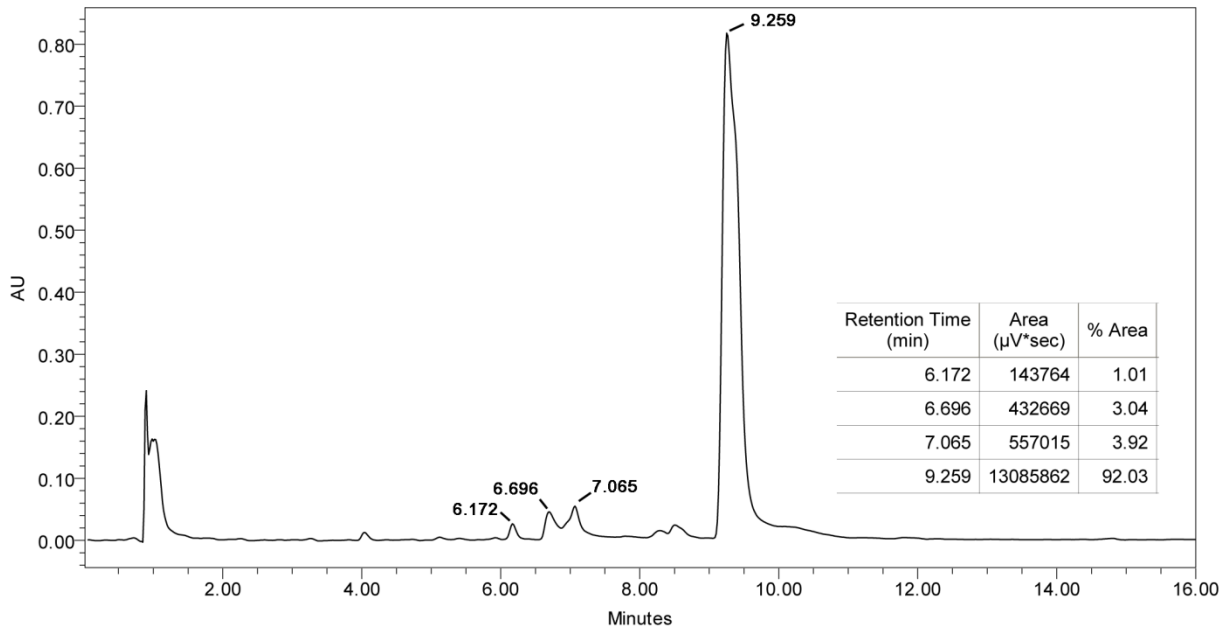

Compound **9** 5-95% CH<sub>3</sub>OH/H<sub>2</sub>O gradient:

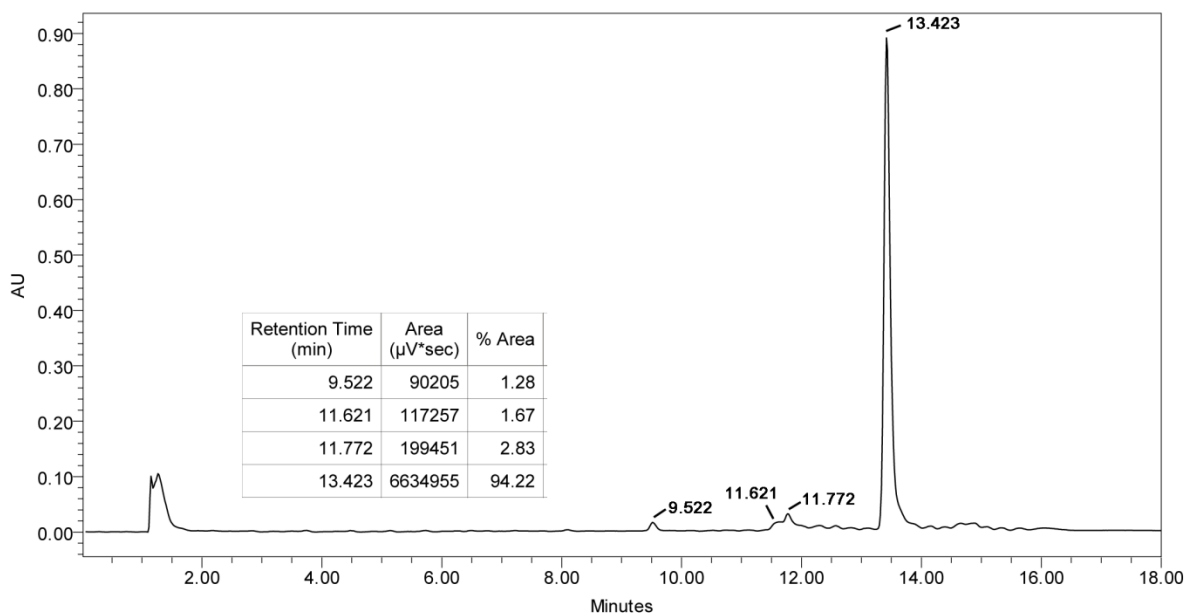

Compound **10** 5-95% CH<sub>3</sub>CN/H<sub>2</sub>O gradient:

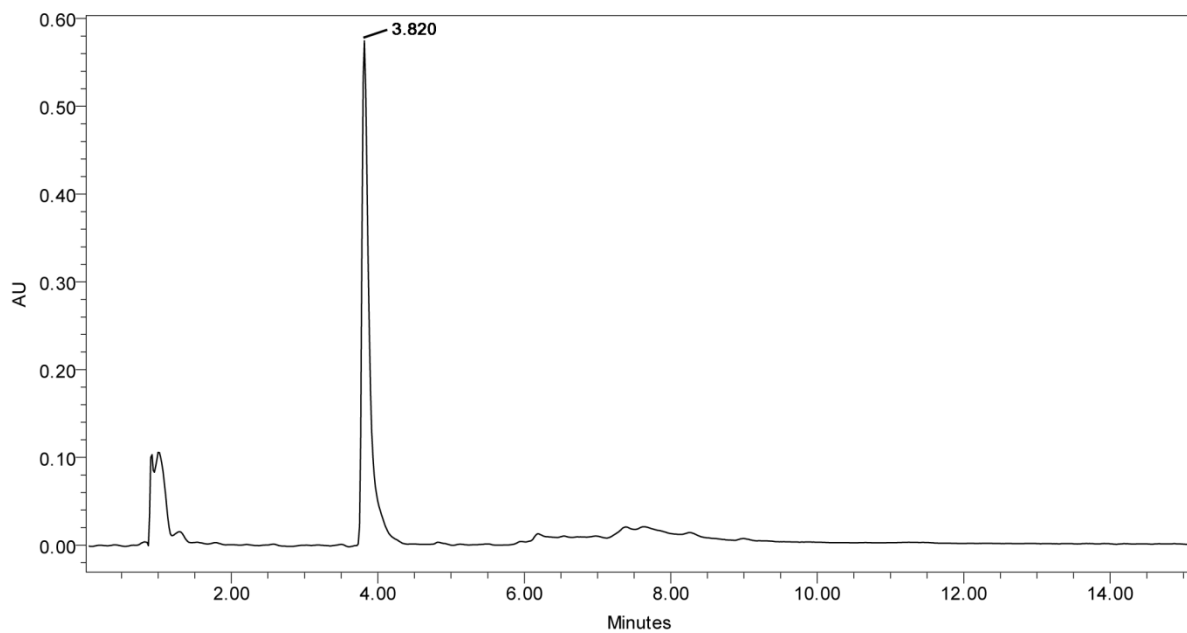

Compound **10** 5-95% CH<sub>3</sub>CN/H<sub>2</sub>O gradient:

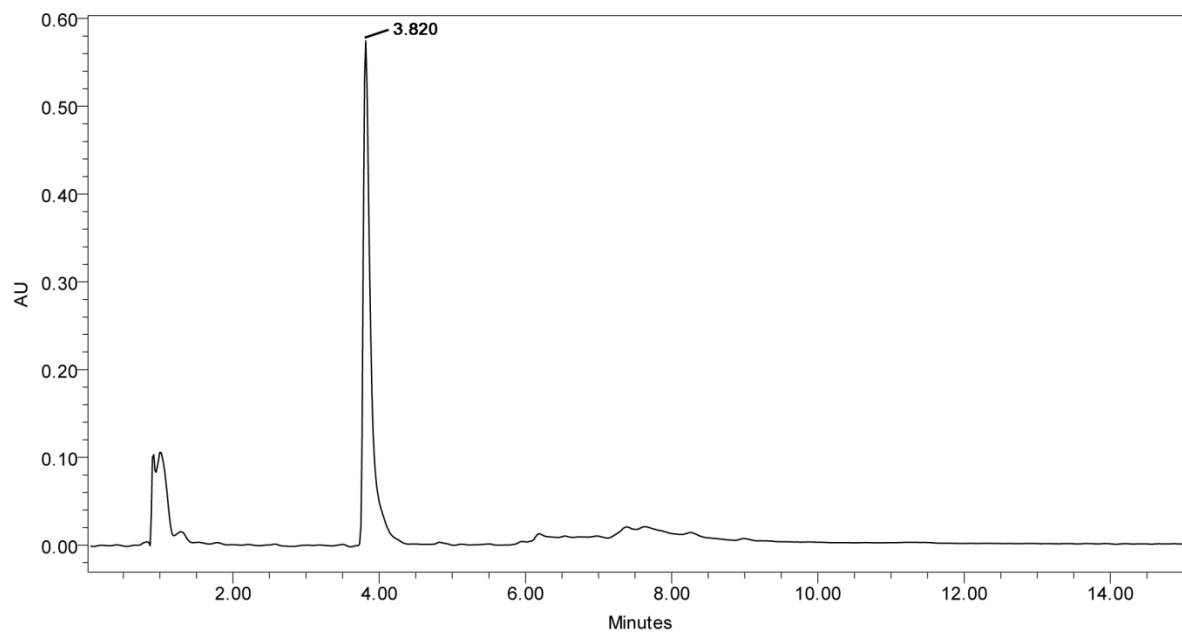

Compound **10** 5-95% CH<sub>3</sub>OH/H<sub>2</sub>O gradient:

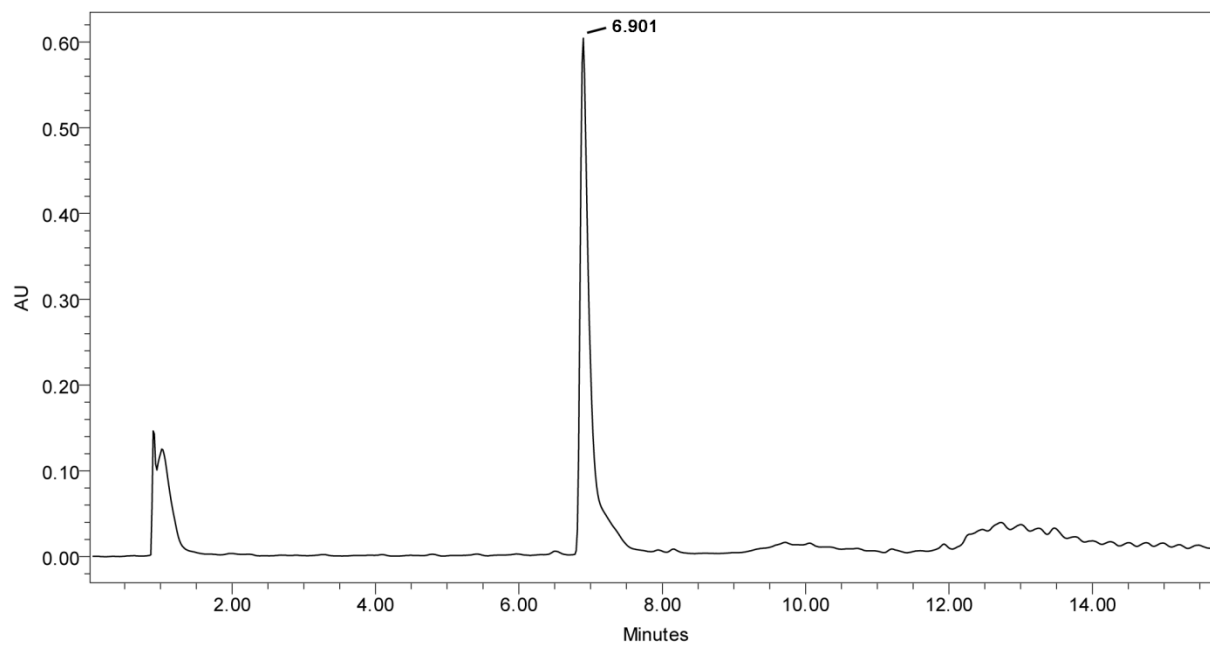

## VI. Analytical HPLC trace of compound 4 stability in cell lysate

Compound 4 was incubated with SK-BR-3 cell lysate at 500  $\mu\text{M}$  for 24 hours at 37  $^{\circ}\text{C}$ . An aliquot (10  $\mu\text{L}$ ) was injected at 0 min and 24 h into a Waters $^{\circ}$  Xbridge C18 column (2.1 x 100 mm) and eluted using a linear gradient of  $\text{CH}_3\text{CN}$  (5-95%) in  $\text{H}_2\text{O}$  over 15 min. at a flow rate of 0.5 mL/min.

Time = 0 min

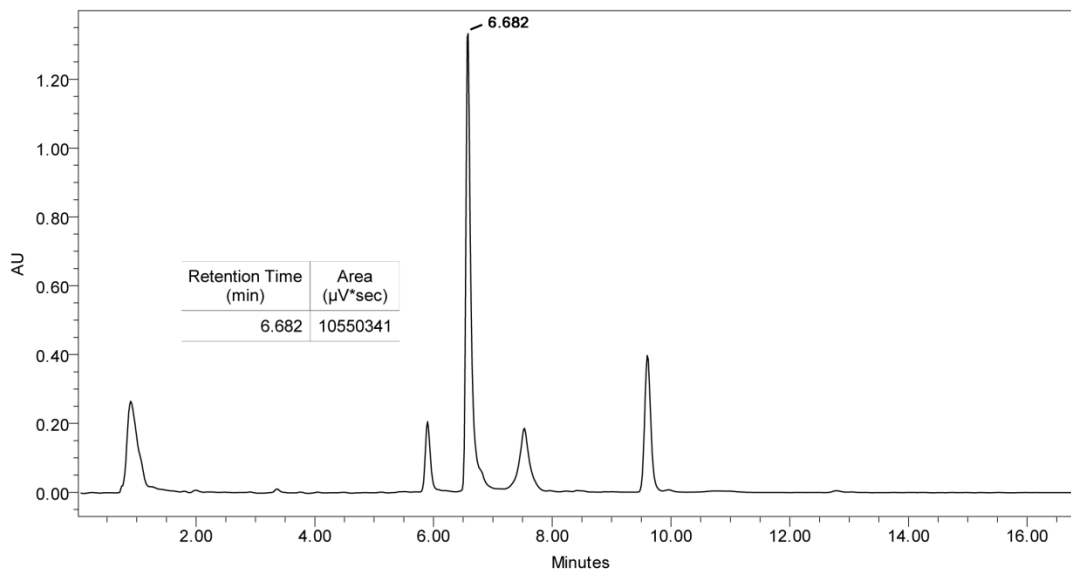

Time = 24 hours

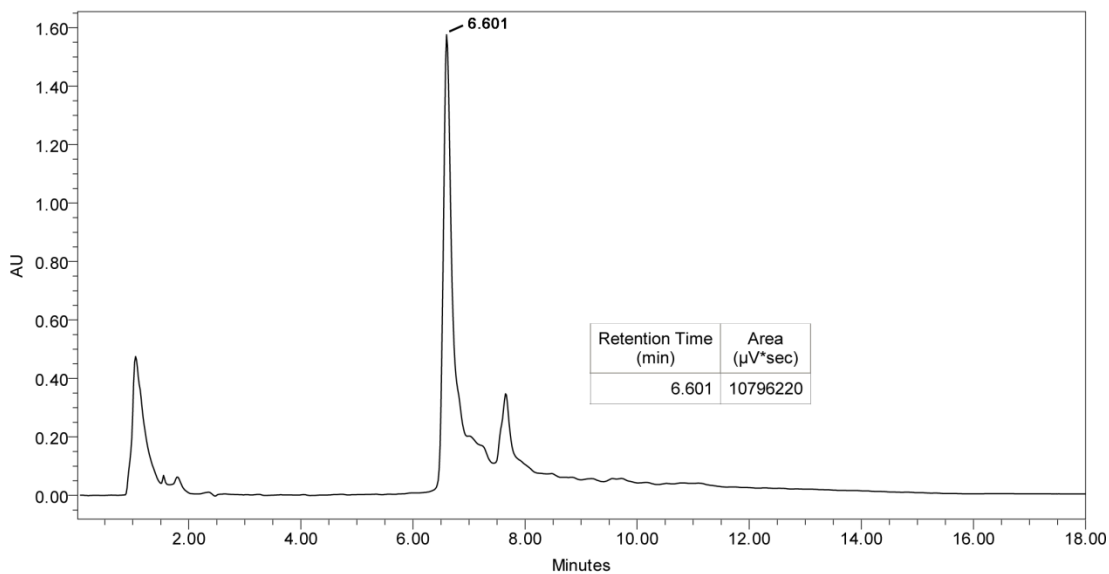

## VII. ATP $K_M$ Curves

**General procedure for ATP  $K_M$  determination.** The previously described fluorescence assay<sup>4</sup> was used to determine  $K_M$  values. Reaction volumes of 100  $\mu\text{L}$  were used in 96-well plates. 85  $\mu\text{L}$  of enzyme in buffer was added to each well. 2.5  $\mu\text{L}$  of DMSO was then added followed by 2.5  $\mu\text{L}$  of a substrate peptide (“compound 3” as described in Wang et al)<sup>4</sup> solution (1.8 mM in DMSO). The reaction was initiated with 10  $\mu\text{L}$  of the appropriate ATP dilution (typically 1000, 500, 250, 125, 62.5, 31.3, 15.6, 7.8, 3.9, 2.0  $\mu\text{M}$  in  $\text{H}_2\text{O}$ ) and reaction progress was immediately monitored at 405 nm (ex. 340 nm) for 10 minutes. Reactions had final concentrations of 30 nM enzyme, 45  $\mu\text{M}$  peptide substrate, 100  $\mu\text{M}$   $\text{Na}_3\text{VO}_4$ , 100 mM Tris buffer (pH 8), 10 mM  $\text{MgCl}_2$ , 0.01% Triton X-100. The initial rate data collected was used for determination of  $K_M$  values. For  $K_m$  determination, the kinetic values were obtained directly from nonlinear regression of substrate-velocity curves in the presence of varying concentrations of ATP. The equation  $Y = (V_{\text{max}} * X)/(K_m + X)$ ,  $X$  = substrate concentration ( $\mu\text{M}$ ) and  $Y$  = enzyme velocity (RFU/s); was used in the nonlinear regression. Each ATP  $K_M$  value was determined using at least three independent experiments.  $K_M$  values were used to determine  $K_i$  values using the Cheng-Prusoff equation for competitive inhibition.<sup>6</sup> A representative  $K_M$  curve is shown. The  $K_M$  for c-Src that was used here is 98  $\mu\text{M}$  and was previously determined by our group.<sup>7</sup>

### A. ATP $K_M$ Curve with KD c-Hck enzyme:

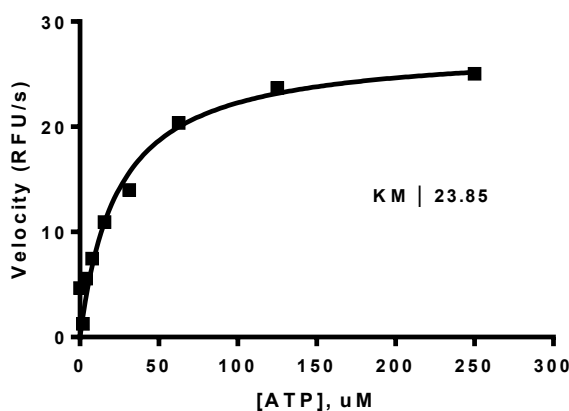

$$K_M = 20 \pm 1.6 \mu\text{M}$$
$$V_{\text{max}} = 23 \pm 2.9 \mu\text{M (RFU/s)}$$

### B. ATP $K_M$ Curve with KD c-Abl enzyme:

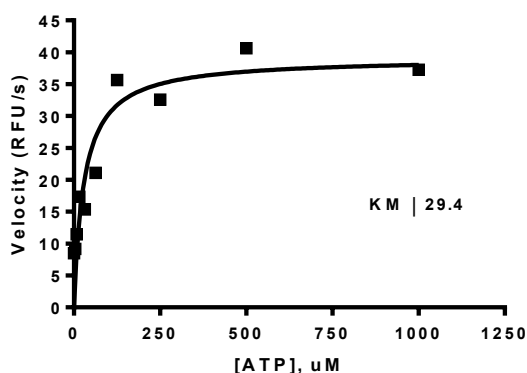

$$K_M = 22 \pm 7.0 \mu\text{M}$$
$$V_{\text{max}} = 45 \pm 4.2 \mu\text{M (RFU/s)}$$

### VIII. $K_M$ Curve for peptide substrate of HDAC1

The  $K_M$  value for Ac(Lys) substrated used in our Fluor de Lys-based assay was determined to enable conversion of  $IC_{50}$  values to  $K_i$  values.

Acetyl-Leu-Gly-Lys(Acetyl)-AMCA

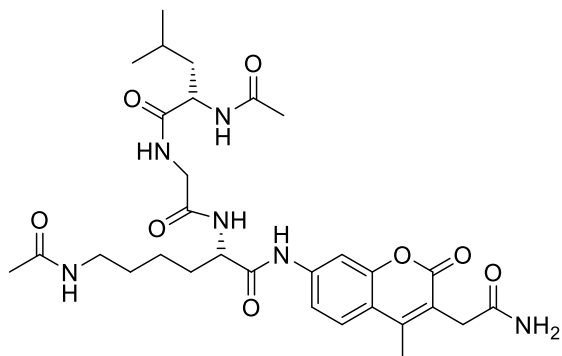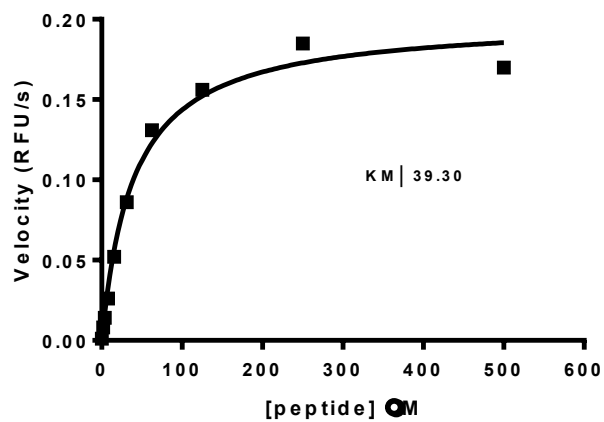

$$K_m = 39.6 \pm 0.78 \mu\text{M}$$
$$V_{\text{max}} = 0.2 \pm 0.002 \mu\text{M (RFU/s)}$$

## IX. HDAC PROFILING

HDAC profiling was performed by Reaction Biology (Malvern, PA). Compound 4 was tested in 10-dose response format in duplicate with 5-fold serial dilution starting at 10  $\mu\text{M}$  against HDAC-1, -2, -3, -6, -8, and -10 and -11. Compound 4 was tested in 10-dose  $\text{IC}_{50}$  mode in duplicate with 5-fold serial dilution starting at 100  $\mu\text{M}$  against HDAC-4, -5, -7 and -9. General substrate used for HDAC-1, -2, -3, -6, -10, and -11 is a fluorogenic peptide from p53 residues 379-382 (RHKK(Ac)). Substrate for HDAC-8 used is a fluorogenic peptide from p53 residues 379-382 (RHK(Ac)K(Ac)). Fluorogenic HDAC Class IIa Substrate (Boc-Lys(trifluoroacetyl)-AMC) was used for HDAC-4,-5,-7, and -9.

### Class I HDAC

Compound 4  $\text{IC}_{50}$  Data for HDAC-1

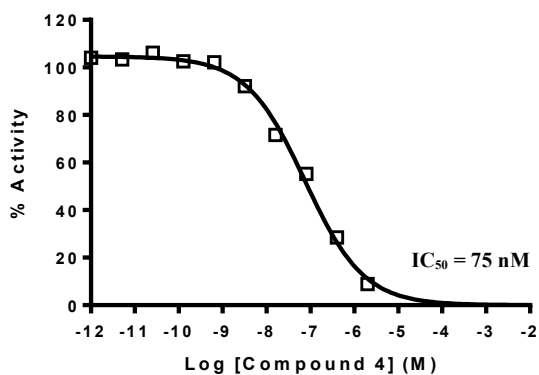

Avg  $\text{IC}_{50} = 86 \pm 11.0$  nM

Compound 4  $\text{IC}_{50}$  Data for HDAC-2

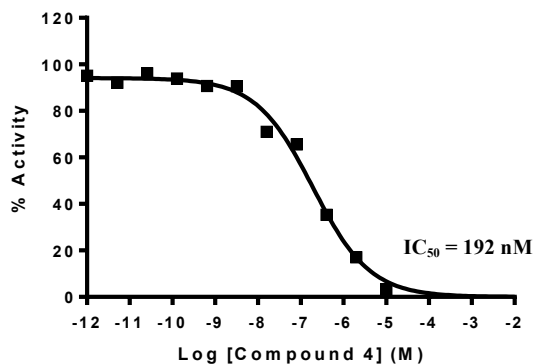

Avg  $\text{IC}_{50} = 231 \pm 39$  nM

Compound 4  $\text{IC}_{50}$  Data for HDAC-3

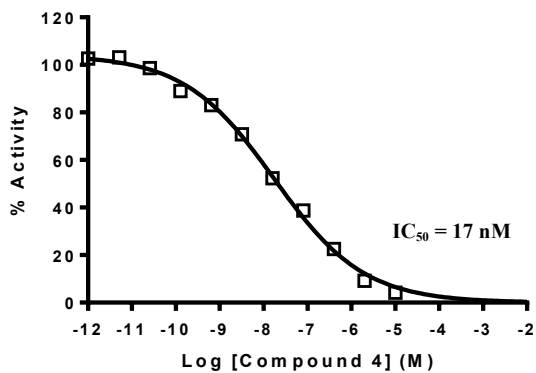

Avg  $\text{IC}_{50} = 19 \pm 1.4$  nM

Compound 4  $\text{IC}_{50}$  Data for HDAC-8

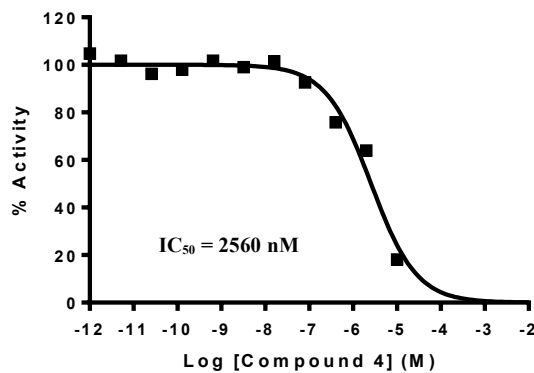

Avg  $\text{IC}_{50} = 2311 \pm 251$  nM



## Class IIa

Compound 4 IC<sub>50</sub> Data for HDAC-4

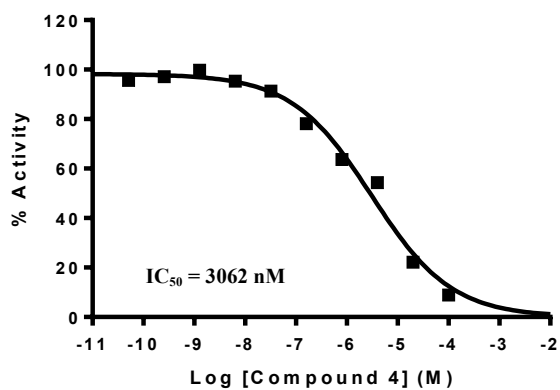

Avg IC<sub>50</sub> = 3982 ± 920 nM

Compound 4 IC<sub>50</sub> Data for HDAC-5

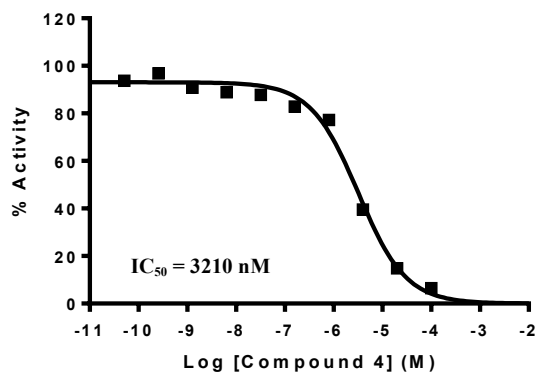

Avg IC<sub>50</sub> = 3891 ± 681 nM

Compound 4 IC<sub>50</sub> Data for HDAC-7

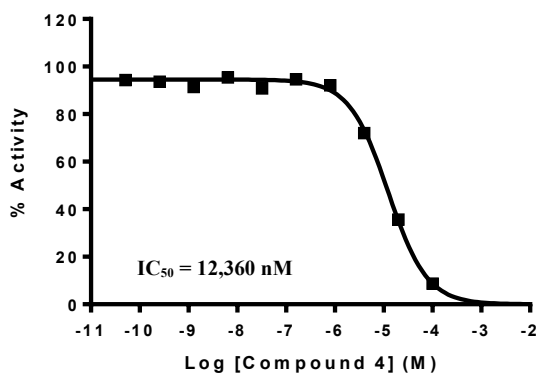

Avg IC<sub>50</sub> = 13,220 ± 860 nM

Compound 4 IC<sub>50</sub> Data for HDAC-9

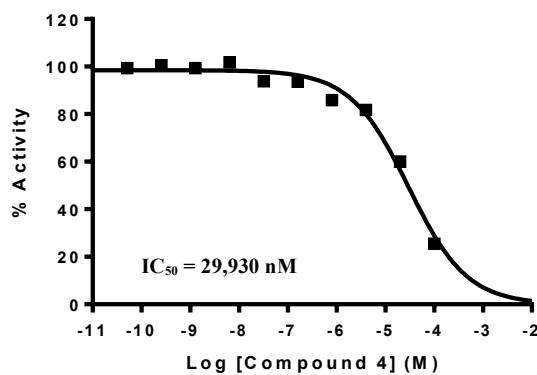

Avg IC<sub>50</sub> = 28,020 ± 1910 nM

## Class IIb

Compound 4 IC<sub>50</sub> Data for HDAC-6

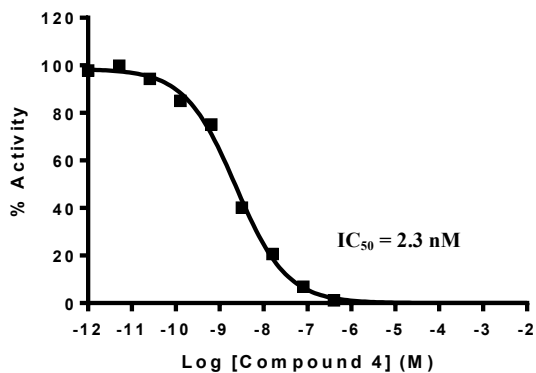

Avg IC<sub>50</sub> = 2.7 ± 0.5 nM

Compound 4 IC<sub>50</sub> Data for HDAC-10

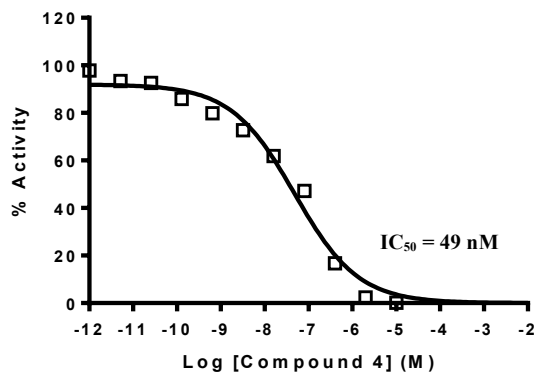

Avg IC<sub>50</sub> = 51 ± 3.2 nM

## Class IV

Compound 4 IC<sub>50</sub> Data for HDAC-11

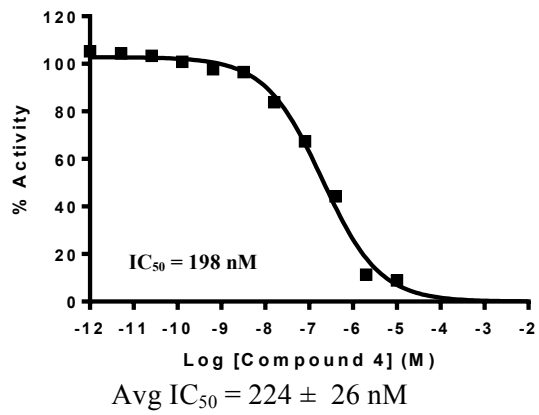

## X. CELLULAR CHARACTERIZATION

### A. Cell growth inhibition assays.

WST-1 reagent was obtained from Roche Applied Science. The cell proliferation colorimetric assay using WST-1 was performed according to manufacturer's procedure ([https://cssportal.roche.com/LFR\\_PublicDocs/ras/11644807001\\_en\\_11.pdf](https://cssportal.roche.com/LFR_PublicDocs/ras/11644807001_en_11.pdf)).

**Cell Culture and Seeding Procedure:** Cells were dispersed from flasks and collected by centrifugation (200xg for 5 minutes at room temperature). An aliquot of the resuspended cells was mixed with trypan blue solution and the cell number was quantified using a hemacytometer. In general, depending on the growth rate of the untreated cells, the cells were plated at  $5.0 - 7.5 \times 10^3$  cells per well. The cells were plated into sterile, clear bottom 96 well plates and cultured under normal growth conditions overnight prior to dosing with compound.

**Dosing:** 100% DMSO compound stocks were prepared to 100X the final concentration desired in the assay. 3  $\mu$ L of the DMSO stock solution was then added to 297  $\mu$ L of the cell growth media to give a DMSO concentration of 1%. The cell media was removed by aspiration for adherent cells and replaced with 100  $\mu$ L per well of the cell growth media containing the compound. In general, each compound concentration was dosed in triplicate wells. Assay: After the dosing period (72 hours) was complete, the plates were removed from the incubator and 10  $\mu$ L per well of WST-1 reagent was added. The plates were returned to the incubator and incubated for 1 h, followed by shaking on a plate shaker for 60 seconds prior to the absorbance read (450 nm) on a BioTek Synergy 4 multimode plate reader.

**Data Analysis:** The reference absorbance reading was subtracted from the formazan absorbance at 690 nm (background control well no compound added, 1% DMSO) and the data was plotted as a percentage of the vehicle (1% DMSO alone). Data analysis and curve fitting was performed using Graphpad Prism. For each cell line, there were  $n = 3$  data points for each concentration. Each dose response curve was performed at least twice, providing  $n \geq 6$  for each data point.

### A. SK-BR-3 with Vorinostat:

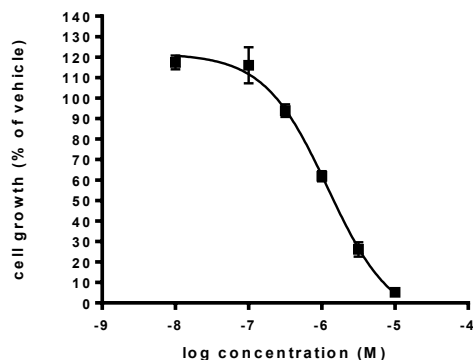

$$GI_{50} = 1.21 \pm 0.09 \mu\text{M}$$

### B. SK-BR-3 with Compound 1:

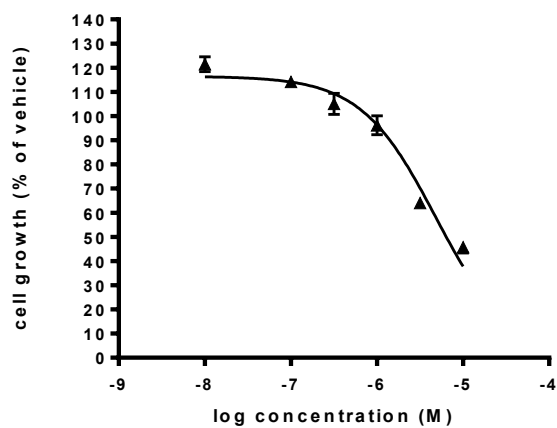

$$GI_{50} = 4.80 \pm 0.22 \mu\text{M}$$

### C. SK-BR-3 with Compound 4:

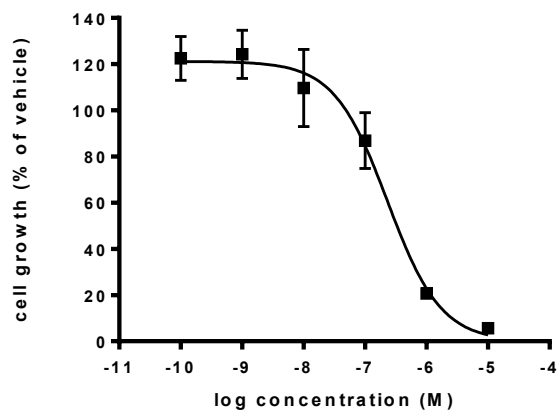

$$GI_{50} = 0.23 \pm 0.03 \mu\text{M}$$

**D. SK-BR-3 with 1:1 combination of Vorinostat + Compound 1:**

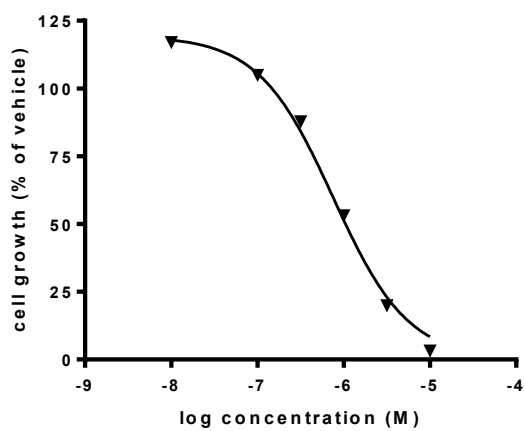

$$GI_{50} = 0.75 \pm 0.03 \mu\text{M}$$

**E. HMEC with Vorinostat:**

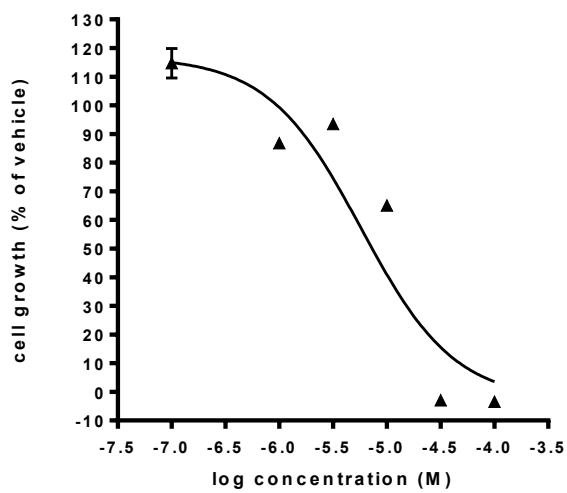

$$GI_{50} = 5.79 \pm 0.24 \mu\text{M}$$

### F. HMEC with Compound 1:

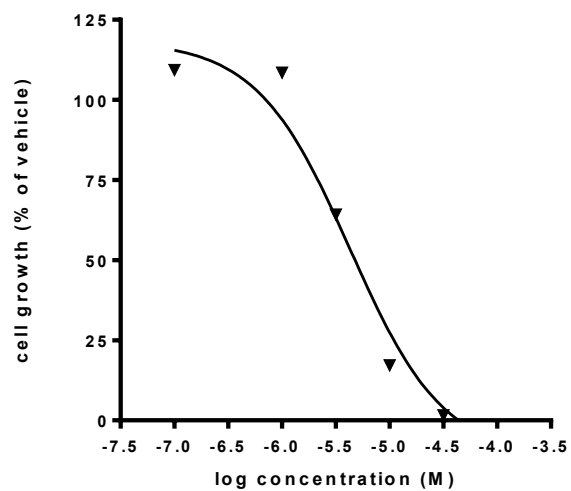

$$GI_{50} = 4.29 \pm 0.40 \mu\text{M}$$

### G. HMEC with Compound 4:

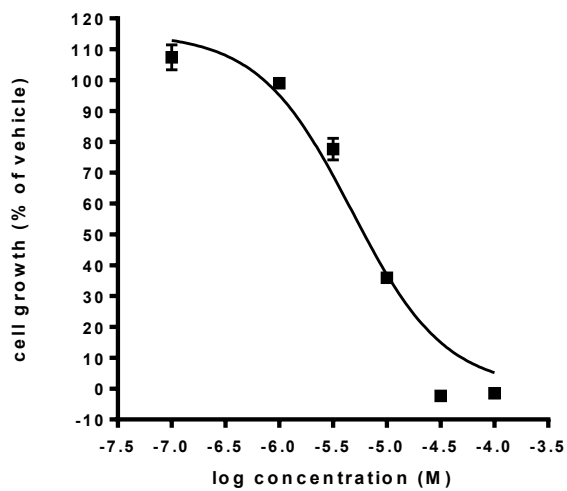

$$GI_{50} = 4.73 \pm 0.33 \mu\text{M}$$

## H. HMEC with 1:1 combination of Vorinostat + Compound 1 :

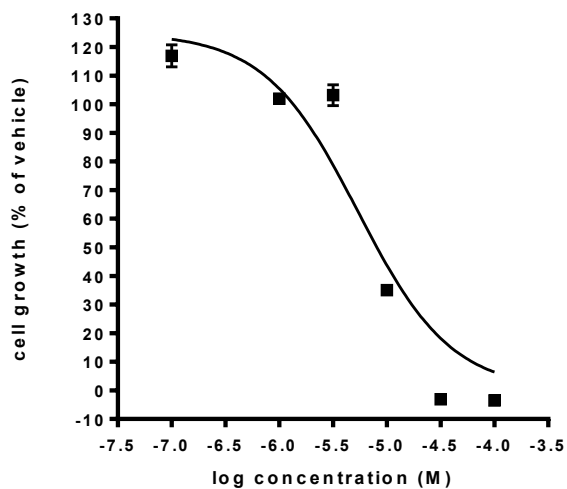

$$GI_{50} = 5.40 \pm 0.19 \mu\text{M}$$

## I. HMEC with Dasatinib

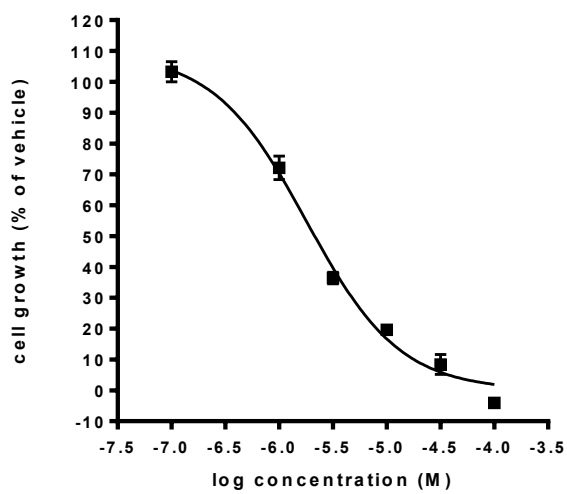

$$GI_{50} = 1.80 \pm 0.33 \mu\text{M}$$

## XI. NCI Cancer Cell Profiling for Compound 4

The protocol for NCI-60 profiling is provided by the NCI Developmental Therapeutics Program<sup>8</sup> and is as follows:

The human tumor cell lines of the cancer screening panel are grown in RPMI 1640 medium containing 5% fetal bovine serum and 2 mM L-glutamine. For a typical screening experiment, cells are inoculated into 96 well microtiter plates in 100  $\mu$ L at plating densities ranging from 5,000 to 40,000 cells/well depending on the doubling time of individual cell lines. After cell inoculation, the microtiter plates are incubated at 37° C, 5 % CO<sub>2</sub>, 95 % air and 100 % relative humidity for 24 h prior to addition of experimental drugs.

After 24 h, two plates of each cell line are fixed *in situ* with TCA, to represent a measurement of the cell population for each cell line at the time of drug addition (Tz). Experimental drugs are solubilized in dimethyl sulfoxide at 400-fold the desired final maximum test concentration and stored frozen prior to use. At the time of drug addition, an aliquot of frozen concentrate is thawed and diluted to twice the desired final maximum test concentration with complete medium containing 50  $\mu$ g/ml gentamicin. Additional four, 10-fold or 1/2 log serial dilutions are made to provide a total of five drug concentrations plus control. Aliquots of 100  $\mu$ l of these different drug dilutions are added to the appropriate microtiter wells already containing 100  $\mu$ l of medium, resulting in the required final drug concentrations.

Following drug addition, the plates are incubated for an additional 48 h at 37°C, 5 % CO<sub>2</sub>, 95 % air, and 100 % relative humidity. For adherent cells, the assay is terminated by the addition of cold TCA. Cells are fixed *in situ* by the gentle addition of 50  $\mu$ l of cold 50 % (w/v) TCA (final concentration, 10 % TCA) and incubated for 60 minutes at 4°C. The supernatant is discarded, and the plates are washed five times with tap water and air dried. Sulforhodamine B (SRB) solution (100  $\mu$ l) at 0.4 % (w/v) in 1 % acetic acid is added to each well, and plates are incubated for 10 minutes at room temperature. After staining, unbound dye is removed by washing five times with 1 % acetic acid and the plates are air dried. Bound stain is subsequently solubilized with 10 mM trizma base, and the absorbance is read on an automated plate reader at a wavelength of 515 nm. For suspension cells, the methodology is the same except that the assay is terminated by fixing settled cells at the bottom of the wells by gently adding 50  $\mu$ l of 80 % TCA (final concentration, 16 % TCA). Using the seven absorbance measurements [time zero, (Tz), control growth, (C), and test growth in the presence of drug at the five concentration levels (Ti)], the percentage growth is calculated at each of the drug concentrations levels. Percentage growth inhibition is calculated as:

$[(Ti-Tz)/(C-Tz)] \times 100$  for concentrations for which  $Ti \geq Tz$

$[(Ti-Tz)/Tz] \times 100$  for concentrations for which  $Ti < Tz$ .

Three dose response parameters are calculated for each experimental agent. Growth inhibition of 50 % (GI50) is calculated from  $[(Ti-Tz)/(C-Tz)] \times 100 = 50$ , which is the drug concentration resulting in a 50% reduction in the net protein increase (as measured by SRB staining) in control cells during the drug incubation. The drug concentration resulting in total growth inhibition (TGI) is calculated from  $Ti = Tz$ . The LC50 (concentration of drug resulting in a 50% reduction in the measured protein at the end of the drug treatment as compared to that at the beginning)



indicating a net loss of cells following treatment is calculated from  $[(T_i - T_z)/T_z] \times 100 = -50$ . Values are calculated for each of these three parameters if the level of activity is reached; however, if the effect is not reached or is exceeded, the value for that parameter is expressed as greater or less than the maximum or minimum concentration tested.

NCI-60 profile for compound 4:

| National Cancer Institute Developmental Therapeutics Program<br>In-Vitro Testing Results |           |       |                                       |       |       |       |                |      |                |               |      |      |         |           |           |
|------------------------------------------------------------------------------------------|-----------|-------|---------------------------------------|-------|-------|-------|----------------|------|----------------|---------------|------|------|---------|-----------|-----------|
| NSC : D - 763846 / 1                                                                     |           |       | Experiment ID : 1203NS37              |       |       |       | Test Type : 08 |      |                | Units : Molar |      |      |         |           |           |
| Report Date : May 14, 2012                                                               |           |       | Test Date : March 26, 2012            |       |       |       | QNS :          |      |                | MC :          |      |      |         |           |           |
| COMI : KK-137 (115692)                                                                   |           |       | Stain Reagent : SRB Dual-Pass Related |       |       |       | SSPL : 0XSK    |      |                |               |      |      |         |           |           |
| Panel/Cell Line                                                                          | Time Zero | Ctrl  | Log10 Concentration                   |       |       |       |                |      | Percent Growth |               |      |      | GI50    | TGI       | LC50      |
|                                                                                          |           |       | -8.0                                  | -7.0  | -6.0  | -5.0  | -4.0           | -8.0 | -7.0           | -6.0          | -5.0 | -4.0 |         |           |           |
| <b>Leukemia</b>                                                                          |           |       |                                       |       |       |       |                |      |                |               |      |      |         |           |           |
| CCRF-CEM                                                                                 | 0.709     | 2.464 | 2.480                                 | 2.098 | 0.729 | 0.423 | 0.621          | 101  | 79             | 1             | -40  | -12  | 2.36E-7 | 1.05E-6   | > 1.00E-4 |
| HL-60(TB)                                                                                | 0.902     | 2.582 | 2.672                                 | 2.669 | 1.104 | 0.484 | 0.637          | 105  | 105            | 12            | -46  | -29  | 3.91E-7 | 1.61E-6   | > 1.00E-4 |
| K-562                                                                                    | 0.273     | 1.696 | 1.680                                 | 1.466 | 0.408 | 0.316 | 0.389          | 99   | 84             | 9             | 3    | 8    | 2.85E-7 | > 1.00E-4 | > 1.00E-4 |
| MOLT-4                                                                                   | 0.728     | 2.328 | 2.261                                 | 1.912 | 0.551 | 0.396 | 0.639          | 96   | 74             | -24           | -46  | -12  | 1.75E-7 | 5.66E-7   | > 1.00E-4 |
| RFMI-8226                                                                                | 0.911     | 2.351 | 2.418                                 | 2.452 | 1.045 | 0.613 | 0.755          | 105  | 107            | 9             | -33  | -17  | 3.83E-7 | 1.66E-6   | > 1.00E-4 |
| SR                                                                                       | 0.453     | 1.459 | 1.421                                 | 0.999 | 0.543 | 0.336 | 0.524          | 96   | 54             | 9             | -26  | 7    | 1.24E-7 | .         | > 1.00E-4 |
| <b>Non-Small Cell Lung Cancer</b>                                                        |           |       |                                       |       |       |       |                |      |                |               |      |      |         |           |           |
| A49(ATCC)                                                                                | 0.256     | 1.124 | 1.115                                 | 1.119 | 0.722 | 0.161 | 0.159          | 99   | 99             | 54            | -37  | -38  | 1.10E-6 | 3.90E-6   | > 1.00E-4 |
| HOP-62                                                                                   | 0.332     | 0.975 | 0.983                                 | 0.926 | 0.596 | 0.319 | 0.144          | 101  | 92             | 41            | -4   | -57  | 6.68E-7 | 8.12E-6   | 7.44E-6   |
| HOP-92                                                                                   | 1.339     | 1.669 | 1.635                                 | 1.553 | 1.027 | 0.369 | 0.438          | 89   | 65             | -23           | -72  | -67  | 1.47E-7 | 5.43E-7   | 3.49E-6   |
| NCI-H226                                                                                 | 0.563     | 1.107 | 1.097                                 | 1.078 | 1.031 | 0.530 | 0.253          | 98   | 95             | 86            | -6   | -55  | 2.46E-6 | 8.62E-6   | 7.89E-6   |
| NCI-H23                                                                                  | 0.598     | 1.786 | 1.755                                 | 1.680 | 1.080 | 0.305 | 0.252          | 97   | 91             | 41            | -49  | -58  | 6.51E-7 | 2.84E-6   | 1.30E-6   |
| NCI-H322M                                                                                | 0.849     | 1.539 | 1.502                                 | 1.471 | 1.054 | 0.572 | 0.389          | 95   | 90             | 30            | -33  | -54  | 4.61E-7 | 2.99E-6   | 6.39E-6   |
| NCI-H460                                                                                 | 0.255     | 1.993 | 2.053                                 | 2.007 | 0.802 | 0.232 | 0.101          | 103  | 101            | 31            | -9   | -60  | 5.40E-7 | 5.93E-6   | 6.27E-6   |
| <b>Colon Cancer</b>                                                                      |           |       |                                       |       |       |       |                |      |                |               |      |      |         |           |           |
| COLO 205                                                                                 | 0.321     | 1.125 | 1.197                                 | 1.101 | 0.509 | 0.085 | 0.124          | 109  | 97             | 23            | -74  | -62  | 4.35E-7 | 1.74E-6   | 5.70E-6   |
| HCC-2998                                                                                 | 0.364     | 1.120 | 1.121                                 | 0.994 | 0.588 | 0.047 | 0.098          | 100  | 83             | 30            | -87  | -73  | 4.17E-7 | 1.79E-6   | 4.81E-6   |
| HCT-116                                                                                  | 0.227     | 1.625 | 1.594                                 | 1.283 | 0.241 | 0.039 | 0.043          | 98   | 76             | 1             | -83  | -81  | 2.20E-7 | 1.03E-6   | 4.06E-6   |
| HCT-15                                                                                   | 0.311     | 1.825 | 1.717                                 | 1.704 | 1.445 | 0.604 | 0.538          | 93   | 92             | 75            | 19   | 15   | 2.80E-6 | > 1.00E-4 | > 1.00E-4 |
| HT29                                                                                     | 0.223     | 1.183 | 1.106                                 | 1.000 | 0.323 | 0.128 | 0.095          | 92   | 81             | 10            | -43  | -58  | 2.74E-7 | 1.57E-6   | 3.05E-6   |
| KM12                                                                                     | 0.443     | 1.959 | 1.934                                 | 1.793 | 0.914 | 0.080 | 0.087          | 98   | 89             | 31            | -82  | -80  | 4.71E-7 | 1.88E-6   | 5.21E-6   |
| SW-620                                                                                   | 0.288     | 1.659 | 1.684                                 | 1.425 | 0.295 | 0.223 | 0.214          | 102  | 83             | 1             | -23  | -26  | 2.51E-7 | 1.05E-6   | > 1.00E-4 |
| <b>CNS Cancer</b>                                                                        |           |       |                                       |       |       |       |                |      |                |               |      |      |         |           |           |
| SF-268                                                                                   | 0.695     | 1.761 | 1.693                                 | 1.552 | 0.827 | 0.184 | 0.102          | 94   | 82             | 19            | -70  | -83  | 3.22E-7 | 1.64E-6   | 6.01E-6   |
| SF-295                                                                                   | 0.963     | 2.290 | 2.230                                 | 2.252 | 1.598 | 0.642 | 0.633          | 96   | 97             | 48            | -33  | -34  | 9.04E-7 | 3.88E-6   | > 1.00E-4 |
| SF-639                                                                                   | 0.954     | 2.372 | 2.289                                 | 2.135 | 1.362 | 0.797 | 0.633          | 94   | 83             | 29            | -17  | -34  | 4.08E-7 | 4.32E-6   | > 1.00E-4 |
| SNB-75                                                                                   | 0.687     | 1.396 | 1.276                                 | 1.094 | 0.834 | 0.616 | 0.502          | 83   | 57             | 21            | -10  | -27  | 1.58E-7 | 4.62E-6   | > 1.00E-4 |
| U251                                                                                     | 0.326     | 1.385 | 1.326                                 | 1.195 | 0.417 | 0.106 | 0.140          | 94   | 82             | 9             | -67  | -57  | 2.73E-7 | 1.30E-6   | 5.89E-6   |
| <b>Melanoma</b>                                                                          |           |       |                                       |       |       |       |                |      |                |               |      |      |         |           |           |
| LOX IMVI                                                                                 | 0.300     | 1.906 | 1.838                                 | 1.578 | 0.381 | 0.029 | 0.096          | 96   | 80             | 5             | -91  | -68  | 2.49E-7 | 1.13E-6   | 3.77E-6   |
| MALME-3M                                                                                 | 0.686     | 1.167 | 1.094                                 | 0.894 | 0.632 | 0.565 | 0.351          | 85   | 43             | -8            | -18  | -49  | 6.84E-8 | 7.01E-7   | > 1.00E-4 |
| M14                                                                                      | 0.454     | 1.436 | 1.422                                 | 1.229 | 0.617 | 0.200 | 0.072          | 99   | 79             | 17            | -56  | -84  | 2.91E-7 | 1.69E-6   | 8.25E-6   |
| MDA-MB-435                                                                               | 0.461     | 1.788 | 1.716                                 | 1.516 | 0.467 | 0.242 | 0.244          | 95   | 79             | .             | -48  | -47  | 2.36E-7 | 1.02E-6   | > 1.00E-4 |
| SK-MEL-28                                                                                | 0.371     | 0.950 | 0.991                                 | 0.845 | 0.507 | 0.374 | 0.241          | 107  | 82             | 23            | 1    | -35  | 3.51E-7 | 1.03E-6   | > 1.00E-4 |
| SK-MEL-5                                                                                 | 0.681     | 2.262 | 2.202                                 | 2.040 | 0.852 | 0.050 | 0.044          | 96   | 86             | 11            | -93  | -94  | 3.01E-7 | 1.27E-6   | 3.87E-6   |
| UACC-257                                                                                 | 0.558     | 1.205 | 1.167                                 | 0.967 | 0.618 | 0.313 | 0.308          | 94   | 63             | 9             | -44  | -45  | 1.76E-7 | 1.48E-6   | > 1.00E-4 |
| UACC-62                                                                                  | 0.917     | 2.102 | 2.114                                 | 1.788 | 0.939 | 0.262 | 0.422          | 101  | 73             | 2             | -71  | -54  | 2.13E-7 | 1.06E-6   | 5.10E-6   |
| <b>Ovarian Cancer</b>                                                                    |           |       |                                       |       |       |       |                |      |                |               |      |      |         |           |           |
| IGROV1                                                                                   | 0.652     | 1.692 | 1.669                                 | 1.697 | 0.901 | 0.262 | 0.274          | 98   | 100            | 24            | -60  | -58  | 4.56E-7 | 1.93E-6   | 7.62E-6   |
| OVCAR-3                                                                                  | 0.521     | 1.470 | 1.451                                 | 1.289 | 0.659 | 0.142 | 0.130          | 98   | 81             | 14            | -73  | -75  | 2.92E-7 | 1.47E-6   | 5.49E-6   |
| OVCAR-4                                                                                  | 0.418     | 0.816 | 0.790                                 | 0.782 | 0.612 | 0.442 | 0.207          | 93   | 91             | 49            | 6    | -51  | 9.28E-7 | 1.28E-6   | 9.76E-6   |
| OVCAR-5                                                                                  | 0.453     | 1.278 | 1.213                                 | 1.191 | 0.703 | 0.368 | 0.358          | 92   | 89             | 30            | -19  | -21  | 4.64E-7 | 4.14E-6   | > 1.00E-4 |
| OVCAR-8                                                                                  | 0.282     | 1.144 | 1.124                                 | 0.947 | 0.359 | 0.214 | 0.206          | 98   | 77             | 9             | -24  | -27  | 2.50E-7 | 1.86E-6   | > 1.00E-4 |
| NCI/ADR-RES                                                                              | 0.393     | 1.428 | 1.428                                 | 1.369 | 1.105 | 0.610 | 0.544          | 100  | 94             | 69            | 21   | 15   | 2.47E-6 | > 1.00E-4 | > 1.00E-4 |
| SK-OV-3                                                                                  | 0.531     | 1.096 | 1.125                                 | 1.028 | 0.770 | 0.177 | 0.118          | 105  | 88             | 42            | -67  | -78  | 6.77E-7 | 2.44E-6   | 7.03E-6   |
| <b>Renal Cancer</b>                                                                      |           |       |                                       |       |       |       |                |      |                |               |      |      |         |           |           |
| 786-O                                                                                    | 0.774     | 2.313 | 2.285                                 | 2.138 | 1.547 | 0.144 | 0.090          | 98   | 89             | 50            | -81  | -88  | 1.00E-6 | 2.41E-6   | 5.77E-6   |
| A498                                                                                     | 1.111     | 1.671 | 1.589                                 | 1.524 | 1.158 | 0.090 | 0.105          | 85   | 74             | 8             | -92  | -91  | 2.30E-7 | 1.21E-6   | 3.82E-6   |
| ACHN                                                                                     | 0.344     | 1.448 | 1.381                                 | 1.340 | 0.833 | 0.255 | 0.216          | 94   | 90             | 44            | -26  | -37  | 7.50E-7 | 4.28E-6   | > 1.00E-4 |
| CAK8-1                                                                                   | 0.809     | 2.162 | 2.130                                 | 2.121 | 1.731 | 0.411 | 0.432          | 98   | 97             | 68            | -49  | -47  | 1.43E-6 | 3.81E-6   | > 1.00E-4 |
| RFX 393                                                                                  | 0.682     | 1.085 | 1.037                                 | 0.979 | 0.667 | 0.099 | 0.051          | 88   | 74             | -2            | -85  | -93  | 2.06E-7 | 9.36E-7   | 3.75E-6   |
| SN 12C                                                                                   | 0.545     | 1.762 | 1.707                                 | 1.545 | 0.984 | 0.489 | 0.473          | 95   | 82             | 36            | -10  | -13  | 4.98E-7 | 5.98E-6   | > 1.00E-4 |
| UO-31                                                                                    | 0.897     | 1.955 | 1.822                                 | 1.757 | 1.330 | 0.479 | 0.501          | 87   | 81             | 41            | -47  | -44  | 5.96E-7 | 2.93E-6   | > 1.00E-4 |
| <b>Prostate Cancer</b>                                                                   |           |       |                                       |       |       |       |                |      |                |               |      |      |         |           |           |
| PC-3                                                                                     | 0.466     | 1.720 | 1.689                                 | 1.500 | 0.781 | 0.522 | 0.389          | 97   | 82             | 25            | 4    | -17  | 3.68E-7 | 1.62E-6   | > 1.00E-4 |
| DU-145                                                                                   | 0.365     | 1.324 | 1.309                                 | 1.229 | 0.579 | 0.251 | 0.232          | 98   | 90             | 22            | -31  | -37  | 3.90E-7 | 2.60E-6   | > 1.00E-4 |
| <b>Breast Cancer</b>                                                                     |           |       |                                       |       |       |       |                |      |                |               |      |      |         |           |           |
| MCF7                                                                                     | 0.330     | 1.665 | 1.535                                 | 1.501 | 0.592 | 0.205 | 0.204          | 90   | 88             | 20            | -38  | -38  | 3.57E-7 | 2.19E-6   | > 1.00E-4 |
| MDA-MB-231(ATCC)                                                                         | 0.599     | 1.147 | 1.173                                 | 1.098 | 0.720 | 0.290 | 0.320          | 105  | 91             | 22            | -52  | -47  | 3.92E-7 | 1.99E-6   | .         |
| HS 578T                                                                                  | 0.853     | 1.499 | 1.453                                 | 1.292 | 0.805 | 0.649 | 0.704          | 93   | 68             | -6            | -24  | -17  | 1.75E-7 | 8.37E-7   | > 1.00E-4 |
| BT-549                                                                                   | 0.908     | 1.722 | 1.703                                 | 1.671 | 1.302 | 0.444 | 0.405          | 98   | 94             | 48            | -51  | -55  | 9.18E-7 | 3.06E-6   | 9.75E-6   |
| T-47D                                                                                    | 0.558     | 1.262 | 1.230                                 | 1.064 | 0.639 | 0.596 | 0.484          | 95   | 72             | 11            | 5    | -11  | 2.30E-7 | 2.09E-6   | > 1.00E-4 |
| MDA-MB-468                                                                               | 0.551     | 1.211 | 1.125                                 | 1.016 | 0.665 | 0.190 | 0.108          | 87   | 70             | 17            | -66  | -81  | 2.42E-7 | 1.62E-6   | 6.49E-6   |

Mean growth graphs for compound 4:

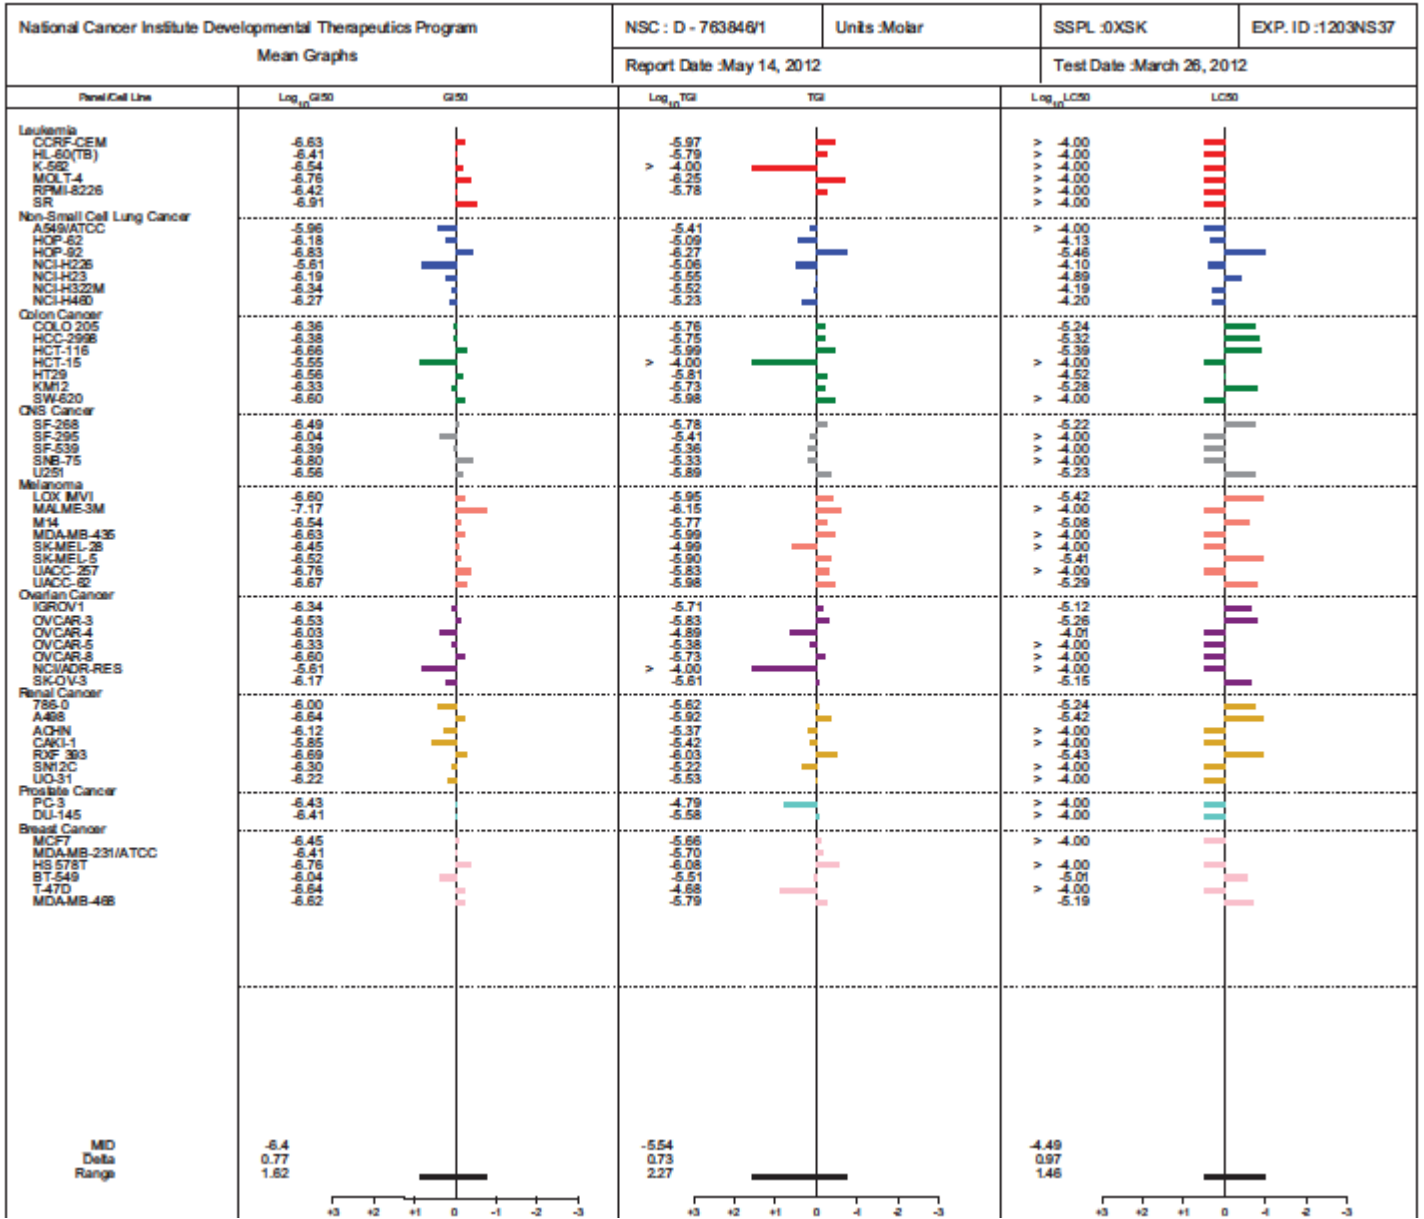

## NCI Cancer Cell Profiling for Vorinostat (Zolinza), NSC 701852

Data provided by the DTP NCI/NIH website, NCI 60 cell line screen dose response data from 08/2012.<sup>8</sup>

| Concentration Unit | CellPanelName          | CellLineName | logValue, GI50 | logValue, TGI50 | logValue, LC50 |
|--------------------|------------------------|--------------|----------------|-----------------|----------------|
| log10(M)           | Leukemia               | CCRF-CEM     | -6.133         | -5.082          | -4             |
| log10(M)           | Leukemia               | HL-60(TB)    | -5.901         | -4.855          | -4             |
| log10(M)           | Leukemia               | K-562        | -6.318         | -4.926          | -4.17          |
| log10(M)           | Leukemia               | MOLT-4       | -6.433         | -4.957          | -4             |
| log10(M)           | Leukemia               | RPMI-8226    | -6.515         | -5.427          | -4.151         |
| log10(M)           | Leukemia               | SR           | -6.403         | -4.471          | -4             |
| log10(M)           | Non-Small Cell Lung    | A549/ATCC    | -5.766         | -4.655          | -4.081         |
| log10(M)           | Non-Small Cell Lung    | EKVX         | -5.848         | -4.277          | -4             |
| log10(M)           | Non-Small Cell Lung    | HOP-62       | -5.805         | -4.112          | -4             |
| log10(M)           | Non-Small Cell Lung    | HOP-92       | -5.534         | -4.488          | -4             |
| log10(M)           | Non-Small Cell Lung    | NCI-H226     | -5.375         | -4.192          | -4             |
| log10(M)           | Non-Small Cell Lung    | NCI-H23      | -5.953         | -5.009          | -4.233         |
| log10(M)           | Non-Small Cell Lung    | NCI-H322M    | -6.072         | -4.886          | -4.159         |
| log10(M)           | Non-Small Cell Lung    | NCI-H460     | -6.111         | -4.146          | -4             |
| log10(M)           | Non-Small Cell Lung    | NCI-H522     | -6.331         | -5.161          | -4.051         |
| log10(M)           | Colon                  | COLO 205     | -6.051         | -5.581          | -5.084         |
| log10(M)           | Colon                  | HCC-2998     | -5.733         | -4.819          | -4.154         |
| log10(M)           | Colon                  | HCT-116      | -6.411         | -5.231          | -4.633         |
| log10(M)           | Colon                  | HCT-15       | -5.562         | -4.071          | -4             |
| log10(M)           | Colon                  | HT29         | -6.127         | -4.807          | -4.054         |
| log10(M)           | Colon                  | KM12         | -5.732         | -4.64           | -4.058         |
| log10(M)           | Colon                  | SW-620       | -6.205         | -5.051          | -4.165         |
| log10(M)           | Central Nervous System | SF-268       | -5.775         | -4.477          | -4.044         |
| log10(M)           | Central Nervous System | SF-295       | -5.88          | -5.046          | -4.166         |
| log10(M)           | Central Nervous System | SF-539       | -5.723         | -4.316          | -4             |
| log10(M)           | Central Nervous System | SNB-19       | -5.681         | -4.748          | -4.037         |
| log10(M)           | Central Nervous System | SNB-75       | -6.1           | -4.258          | -4             |
| log10(M)           | Central Nervous System | U251         | -5.805         | -4.766          | -4.328         |
| log10(M)           | Melanoma               | LOX IMVI     | -5.939         | -4.99           | -4.474         |
| log10(M)           | Melanoma               | MALME-3M     | -6.576         | -5.417          | -4             |
| log10(M)           | Melanoma               | M14          | -5.886         | -4.695          | -4.067         |
| log10(M)           | Melanoma               | MDA-MB-435   | -6.294         | -5.228          | -4.043         |
| log10(M)           | Melanoma               | MDA-N        | -6.271         | -5.495          | -4.458         |
| log10(M)           | Melanoma               | SK-MEL-2     | -5.889         | -4.767          | -4.033         |

|          |          |                 |        |        |        |
|----------|----------|-----------------|--------|--------|--------|
| log10(M) | Melanoma | SK-MEL-28       | -5.926 | -5.07  | -4.227 |
| log10(M) | Melanoma | SK-MEL-5        | -6.183 | -5.574 | -5.056 |
| log10(M) | Melanoma | UACC-257        | -6.308 | -5.028 | -4.049 |
| log10(M) | Melanoma | UACC-62         | -6.351 | -5.561 | -4.826 |
| log10(M) | Ovarian  | IGROV1          | -5.963 | -5.089 | -4.372 |
| log10(M) | Ovarian  | OVCAR-3         | -5.867 | -5.01  | -4.226 |
| log10(M) | Ovarian  | OVCAR-4         | -5.38  | -4.011 | -4     |
| log10(M) | Ovarian  | OVCAR-5         | -6.091 | -4.944 | -4.111 |
| log10(M) | Ovarian  | OVCAR-8         | -6.286 | -4.649 | -4     |
| log10(M) | Ovarian  | NCI/ADR-RES     | -6.806 | -5.568 | -4.375 |
| log10(M) | Ovarian  | SK-OV-3         | -5.955 | -4.881 | -4.134 |
| log10(M) | Renal    | 786-0           | -5.52  | -4.258 | -4.03  |
| log10(M) | Renal    | A498            | -5.865 | -5.174 | -4.628 |
| log10(M) | Renal    | ACHN            | -5.855 | -5.124 | -4.305 |
| log10(M) | Renal    | CAKI-1          | -5.921 | -5.403 | -4.721 |
| log10(M) | Renal    | RXF 393         | -5.9   | -5.266 | -4.334 |
| log10(M) | Renal    | SN12C           | -5.645 | -4.515 | -4.238 |
| log10(M) | Renal    | TK-10           | -6.194 | -5.095 | -4.188 |
| log10(M) | Renal    | UO-31           | -6.262 | -5.199 | -4.159 |
| log10(M) | Prostate | PC-3            | -5.683 | -4.174 | -4     |
| log10(M) | Prostate | DU-145          | -5.89  | -4.747 | -4     |
| log10(M) | Breast   | MCF7            | -5.644 | -4.385 | -4     |
| log10(M) | Breast   | MDA-MB-231/ATCC | -5.607 | -4     | -4     |
| log10(M) | Breast   | HS 578T         | -5.449 | -4.155 | -4     |
| log10(M) | Breast   | BT-549          | -5.77  | -4.629 | -4.016 |
| log10(M) | Breast   | T-47D           | -6.278 | -5.36  | -4     |
| log10(M) | Breast   | MDA-MB-468      | -6.046 | -4.965 | -4.067 |

## NCI Cancer Cell Profiling for Dasatinib (Sprycel), NSC 723517

Data provided by the DTP NCI/NIH website, NCI 60 cell line screen dose response data from 08/2012.<sup>8</sup>

| Concentration Unit | Cell Panel Name        | Cell Line Name | logValue, GI50 | logValue, TGI | logValue, LC50 |
|--------------------|------------------------|----------------|----------------|---------------|----------------|
| log10(M)           | Leukemia               | CCRF-CEM       | -5.135         | -4.699        | -4.699         |
| log10(M)           | Leukemia               | HL-60(TB)      | -5.111         | -4.699        | -4.699         |
| log10(M)           | Leukemia               | K-562          | -8.699         | -4.699        | -4.699         |
| log10(M)           | Leukemia               | MOLT-4         | -5.271         | -4.699        | -4.699         |
| log10(M)           | Leukemia               | RPMI-8226      | -5.132         | -4.699        | -4.699         |
| log10(M)           | Leukemia               | SR             | -5.199         | -4.699        | -4.699         |
| log10(M)           | Non-Small Cell Lung    | A549/ATCC      | -7.378         | -5.484        | -4.699         |
| log10(M)           | Non-Small Cell Lung    | EKVX           | -5.374         | -4.699        | -4.699         |
| log10(M)           | Non-Small Cell Lung    | HOP-62         | -7.439         | -4.699        | -4.699         |
| log10(M)           | Non-Small Cell Lung    | NCI-H226       | -7.334         | -4.699        | -4.699         |
| log10(M)           | Non-Small Cell Lung    | NCI-H23        | -5.282         | -4.699        | -4.699         |
| log10(M)           | Non-Small Cell Lung    | NCI-H322M      | -6.757         | -4.699        | -4.699         |
| log10(M)           | Non-Small Cell Lung    | NCI-H460       | -5.054         | -4.699        | -4.699         |
| log10(M)           | Non-Small Cell Lung    | NCI-H522       | -6.939         | -4.825        | -4.699         |
| log10(M)           | Colon                  | COLO 205       | -7.431         | -4.699        | -4.699         |
| log10(M)           | Colon                  | HCC-2998       | -4.887         | -4.699        | -4.699         |
| log10(M)           | Colon                  | HCT-116        | -5.431         | -4.699        | -4.699         |
| log10(M)           | Colon                  | HCT-15         | -6.101         | -4.699        | -4.699         |
| log10(M)           | Colon                  | HT29           | -7.883         | -4.699        | -4.699         |
| log10(M)           | Colon                  | KM12           | -5.128         | -4.699        | -4.699         |
| log10(M)           | Colon                  | SW-620         | -5.074         | -4.699        | -4.699         |
| log10(M)           | Central Nervous System | SF-268         | -6.95          | -4.782        | -4.699         |
| log10(M)           | Central Nervous System | SF-295         | -5.479         | -4.865        | -4.699         |
| log10(M)           | Central Nervous System | SF-539         | -7.273         | -4.699        | -4.699         |
| log10(M)           | Central Nervous System | SNB-19         | -5.264         | -7.25         | -4.699         |
| log10(M)           | Central Nervous System | SNB-75         | -8.329         | -4.699        | -4.699         |
| log10(M)           | Central Nervous System | U251           | -5.551         | -6.435        | -4.699         |
| log10(M)           | Melanoma               | LOX IMVI       | -8.017         | -4.699        | -5.226         |
| log10(M)           | Melanoma               | MALME-3M       | -5.18          | -4.699        | -4.699         |
| log10(M)           | Melanoma               | M14            | -5.309         | -4.699        | -4.699         |
| log10(M)           | Melanoma               | MDA-MB-435     | -5.221         | -4.699        | -4.699         |
| log10(M)           | Melanoma               | SK-MEL-2       | -5.11          | -4.699        | -4.699         |
| log10(M)           | Melanoma               | SK-MEL-28      | -5.038         | -4.699        | -4.699         |
| log10(M)           | Melanoma               | SK-MEL-5       | -5.171         | -4.76         | -4.699         |
| log10(M)           | Melanoma               | UACC-257       | -5.571         | -4.699        | -4.699         |

|          |          |                 |        |        |        |
|----------|----------|-----------------|--------|--------|--------|
| log10(M) | Melanoma | UACC-62         | -5.245 | -4.699 | -4.699 |
| log10(M) | Ovarian  | IGROV1          | -7.599 | -4.699 | -4.699 |
| log10(M) | Ovarian  | OVCAR-3         | -6.761 | -4.699 | -4.699 |
| log10(M) | Ovarian  | OVCAR-4         | -5.151 | -4.699 | -4.699 |
| log10(M) | Ovarian  | OVCAR-5         | -7.302 | -6.294 | -4.699 |
| log10(M) | Ovarian  | OVCAR-8         | -7.307 | -4.699 | -4.699 |
| log10(M) | Ovarian  | NCI/ADR-RES     | -5.363 | -5.476 | -4.699 |
| log10(M) | Ovarian  | SK-OV-3         | -6.649 | -4.699 | -4.699 |
| log10(M) | Renal    | 786-0           | -6.909 | -6.728 | -4.699 |
| log10(M) | Renal    | A498            | -7.65  | -4.699 | -4.983 |
| log10(M) | Renal    | ACHN            | -7.736 | -6.059 | -4.699 |
| log10(M) | Renal    | CAKI-1          | -7.725 | -7.014 | -4.699 |
| log10(M) | Renal    | RXF 393         | -8.045 | -4.699 | -5.003 |
| log10(M) | Renal    | SN12C           | -7.545 | -7.14  | -4.699 |
| log10(M) | Renal    | TK-10           | -8.074 | -4.769 | -4.699 |
| log10(M) | Renal    | UO-31           | -7.705 | -4.699 | -4.699 |
| log10(M) | Prostate | PC-3            | -5.646 | -4.699 | -4.699 |
| log10(M) | Prostate | DU-145          | -6.801 | -4.699 | -4.699 |
| log10(M) | Breast   | MCF7            | -5.08  | -5.42  | -4.699 |
| log10(M) | Breast   | MDA-MB-231/ATCC | -7.809 | -4.699 | -4.729 |
| log10(M) | Breast   | HS 578T         | -7.601 | -4.699 | -4.699 |
| log10(M) | Breast   | BT-549          | -5.117 | -4.699 | -4.699 |
| log10(M) | Breast   | T-47D           | -6.387 | -5.902 | -4.699 |
| log10(M) | Breast   | MDA-MB-468      | -7.065 |        | -4.699 |

## XII. CELLMINER PROFILE DATA

CellMiner<sup>10</sup> (<http://discover.nci.nih.gov/cellminer/>) was used to generate sensitivity plots for vorinostat, chimera 4, and dasatinib. Visualization the CellMiner<sup>10</sup> output further demonstrates that chimera 4 has a unique cellular activity profile relative to vorinostat and dasatinib.

vorinostat:

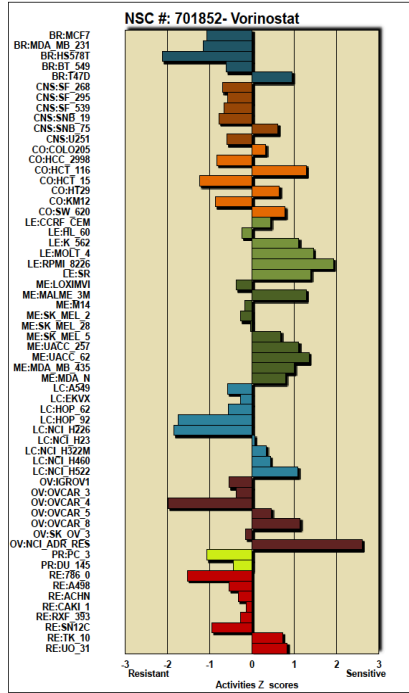

chimera 4:

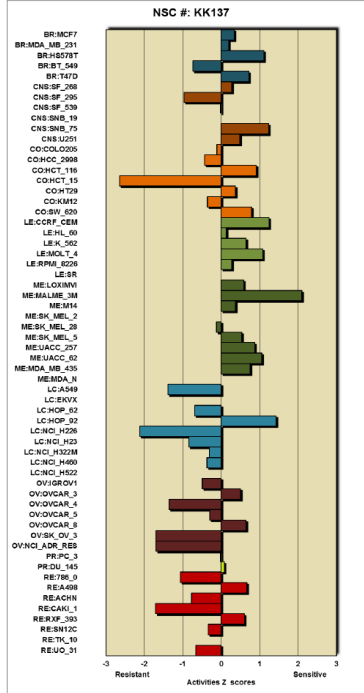

dasatinib:

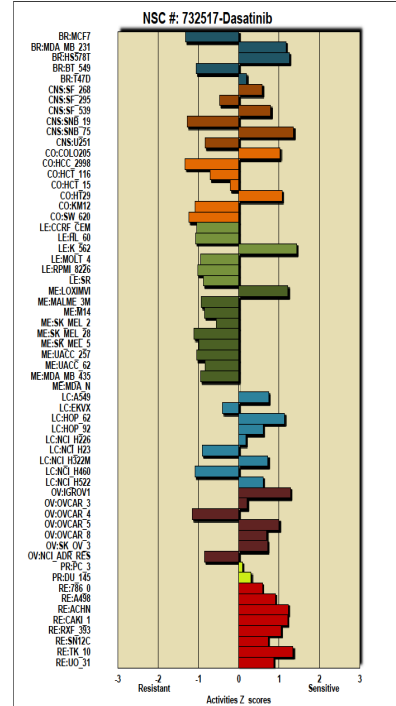



### XIII. References

- (1) Chen, P.; Patil, V.; Guarrant, W.; Green, P.; Oyelere, A. *Bioorg. Med. Chem.* **2008**, *16*, 4839.
- (2) Brandvold, K. R.; Steffey, M. E.; Fox, C. C.; Soellner, M. B. *ACS Chem. Biol.* **2012**, *7*, 1393.
- (3) Fretz, H. *Tetrahedron Letters* **1996**, *37*, 8475.
- (4) Wang, Q.; Cahill, S. M.; Blumenstein, M.; Lawrence, D. S. *J. Am. Chem. Soc.* **2006**, *128*, 1808.
- (5) Shultz, B. E.; Misialek, S.; Wu, J.; Tang, J.; Conn, M. T., R.; Wong, L. *Biochemistry* **2004**, *43*, 11083.
- (6) Cheng, Y.-C.; and Prusoff, W.H. *Biochemical Pharmacology.* **1973**, *22*, 3099.
- (7) Kwarcinski, F. E.; Fox, C. C.; Steffey, M. E.; Soellner, M. B. *ACS Chemical Biology* **2012**, *7*, 1910.
- (8) Developmental Therapeutics Program National Cancer Institute/National Institute of Health. <http://dtp.nci.nih.gov/index.html>.
- (9) Seeliger, M.A.; Young, M.; Henderson, M. N.; Pellicena, P.; King, D.S.; Falick, A. M.; Kuriyan, J.; *Protein Sci.* **2005**, *14*, 3135.
- (10) Reinhold, W. C.; Sunshine, M.; Liu, H.; Varma, S.; Kohn, K. W.; Morris, J.; Doroshow, J.; Pommier, Y. CellMiner: A Web-Based Suite of Genomic and Pharmacologic Tools to Explore Transcript and Drug Patterns in the NCI-60 Cell Line Set. *Cancer Res.* **2012**, *72*, 3499.
